# Supplementary material for: Determinants of well-being and their interconnections in Australian general practitioners: a qualitative study
Source: PubMed Central journal article supplement — BMJ Open. 2022 Jul 5;12(7):e058616. doi: 10.1136/bmjopen-2021-058616 (PMC9258487; doi:10.1136/bmjopen-2021-058616), 2022-07-05
Supplement: bmjopen-2021-058616.draft_revisions.pdf [file bmjopen-2021-058616.draft_revisions.pdf]

# BMJ Open

BMJ Open is committed to open peer review. As part of this commitment we make the peer review history of every article we publish publicly available.

When an article is published we post the peer reviewers' comments and the authors' responses online. We also post the versions of the paper that were used during peer review. These are the versions that the peer review comments apply to.

The versions of the paper that follow are the versions that were submitted during the peer review process. They are not the versions of record or the final published versions. They should not be cited or distributed as the published version of this manuscript.

BMJ Open is an open access journal and the full, final, typeset and author-corrected version of record of the manuscript is available on our site with no access controls, subscription charges or pay-per-view fees (<http://bmjopen.bmj.com>).

If you have any questions on BMJ Open's open peer review process please email [info.bmjopen@bmj.com](mailto:info.bmjopen@bmj.com)

# BMJ Open

## Walking a tight rope. Determinants of GP wellbeing - a qualitative study

|                               |                                                                                                                                                                                                                                                                                                                                                                                                                                                                                                                                                                                                                                                                                                          |
|-------------------------------|----------------------------------------------------------------------------------------------------------------------------------------------------------------------------------------------------------------------------------------------------------------------------------------------------------------------------------------------------------------------------------------------------------------------------------------------------------------------------------------------------------------------------------------------------------------------------------------------------------------------------------------------------------------------------------------------------------|
| Journal:                      | <i>BMJ Open</i>                                                                                                                                                                                                                                                                                                                                                                                                                                                                                                                                                                                                                                                                                          |
| Manuscript ID                 | bmjopen-2021-058616                                                                                                                                                                                                                                                                                                                                                                                                                                                                                                                                                                                                                                                                                      |
| Article Type:                 | Original research                                                                                                                                                                                                                                                                                                                                                                                                                                                                                                                                                                                                                                                                                        |
| Date Submitted by the Author: | 24-Oct-2021                                                                                                                                                                                                                                                                                                                                                                                                                                                                                                                                                                                                                                                                                              |
| Complete List of Authors:     | Naehrig, Diana; The University of Sydney Faculty of Medicine and Health, Central Clinical School; The University of Sydney Faculty of Medicine and Health, Brain and Mind Centre<br>Glozier, Nick; The University of Sydney Faculty of Medicine and Health, Central Clinical School<br>Klinner, Christiane; The University of Sydney Faculty of Medicine and Health<br>Acland, Louise; Healius Limited<br>Goodger, Brendan; Central and Eastern Sydney PHN<br>Hickie, Ian; The University of Sydney Faculty of Medicine and Health, Brain and Mind Centre<br>Milton, Alyssa ; The University of Sydney Faculty of Medicine and Health, Brain and Mind Centre; University of Sydney, School of Psychology |
| Keywords:                     | GENERAL MEDICINE (see Internal Medicine), MENTAL HEALTH, OCCUPATIONAL & INDUSTRIAL MEDICINE, PRIMARY CARE, PUBLIC HEALTH                                                                                                                                                                                                                                                                                                                                                                                                                                                                                                                                                                                 |
|                               |                                                                                                                                                                                                                                                                                                                                                                                                                                                                                                                                                                                                                                                                                                          |

SCHOLARONE™  
Manuscripts

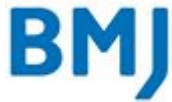

I, the Submitting Author has the right to grant and does grant on behalf of all authors of the Work (as defined in the below author licence), an exclusive licence and/or a non-exclusive licence for contributions from authors who are: i) UK Crown employees; ii) where BMJ has agreed a CC-BY licence shall apply, and/or iii) in accordance with the terms applicable for US Federal Government officers or employees acting as part of their official duties; on a worldwide, perpetual, irrevocable, royalty-free basis to BMJ Publishing Group Ltd ("BMJ") its licensees and where the relevant Journal is co-owned by BMJ to the co-owners of the Journal, to publish the Work in this journal and any other BMJ products and to exploit all rights, as set out in our [licence](#).

The Submitting Author accepts and understands that any supply made under these terms is made by BMJ to the Submitting Author unless you are acting as an employee on behalf of your employer or a postgraduate student of an affiliated institution which is paying any applicable article publishing charge ("APC") for Open Access articles. Where the Submitting Author wishes to make the Work available on an Open Access basis (and intends to pay the relevant APC), the terms of reuse of such Open Access shall be governed by a Creative Commons licence – details of these licences and which [Creative Commons](#) licence will apply to this Work are set out in our licence referred to above.

Other than as permitted in any relevant BMJ Author's Self Archiving Policies, I confirm this Work has not been accepted for publication elsewhere, is not being considered for publication elsewhere and does not duplicate material already published. I confirm all authors consent to publication of this Work and authorise the granting of this licence.

## TITLE PAGE

|                       |                                                                                                                                                                                                                                                                                                                                                                                                                                                                                                                                                                                                                                                                                                                                                                                                                                                                                                                                                                                                                                                                                                                                                                                                                                                                                                                                                                                                                                                                                                                                                                                                                                                                                                                                                                                                                                                                                                                                                                                                                                                                                                                                                                                                                                                                                                                                                                                                              |
|-----------------------|--------------------------------------------------------------------------------------------------------------------------------------------------------------------------------------------------------------------------------------------------------------------------------------------------------------------------------------------------------------------------------------------------------------------------------------------------------------------------------------------------------------------------------------------------------------------------------------------------------------------------------------------------------------------------------------------------------------------------------------------------------------------------------------------------------------------------------------------------------------------------------------------------------------------------------------------------------------------------------------------------------------------------------------------------------------------------------------------------------------------------------------------------------------------------------------------------------------------------------------------------------------------------------------------------------------------------------------------------------------------------------------------------------------------------------------------------------------------------------------------------------------------------------------------------------------------------------------------------------------------------------------------------------------------------------------------------------------------------------------------------------------------------------------------------------------------------------------------------------------------------------------------------------------------------------------------------------------------------------------------------------------------------------------------------------------------------------------------------------------------------------------------------------------------------------------------------------------------------------------------------------------------------------------------------------------------------------------------------------------------------------------------------------------|
| Title                 | <b>Walking a tight rope. Determinants of GP wellbeing - a qualitative study</b>                                                                                                                                                                                                                                                                                                                                                                                                                                                                                                                                                                                                                                                                                                                                                                                                                                                                                                                                                                                                                                                                                                                                                                                                                                                                                                                                                                                                                                                                                                                                                                                                                                                                                                                                                                                                                                                                                                                                                                                                                                                                                                                                                                                                                                                                                                                              |
| Authors               | <p>Diana Naehrig, ORCID (0000-0002-1162-4092),<br/>Dr.med., FMH Radioonkologie, MSc Coach Psych,<br/>PhD candidate, The University of Sydney, Faculty of Medicine and Health,<br/>Level 5, Professor Marie Bashir Centre, Missenden Road, Camperdown,<br/>NSW 2050, Australia, <a href="mailto:dnae2050@uni.sydney.edu.au">dnae2050@uni.sydney.edu.au</a>;</p> <p>Nick Glozier, ORCID (0000-0002-0476-9146),<br/>Professor of Psychological Medicine, The University of Sydney, Faculty of<br/>Medicine and Health, Central Clinical School, Level 5, Professor Marie<br/>Bashir Centre, Missenden Road, Camperdown, NSW 2050, Australia,<br/><a href="mailto:nick.glozier@sydney.edu.au">nick.glozier@sydney.edu.au</a></p> <p>Christiane Klinner, ORCID (0000-0001-9313-6799),<br/>Qualitative researcher, The University of Sydney, Faculty of Medicine and<br/>Health, Level 5, Professor Marie Bashir Centre, Missenden Road,<br/>Camperdown, NSW 2050, Australia, <a href="mailto:Christiane.Klinner@sydney.edu.au">Christiane.Klinner@sydney.edu.au</a>;</p> <p>Louise Acland, ORCID (0000-0003-0417-6989), BA BMed MHM MPH<br/>FRACGP<br/>Head of Clinical Governance, Healius Medical and Dental Centres, Level<br/>1, 30-38 Short St, Leichhardt, NSW 2040, Australia,<br/><a href="mailto:Louise.Acland@healius.com.au">Louise.Acland@healius.com.au</a>;</p> <p>Brendan Goodger, Dr,<br/>General Manager Primary Care Improvement, Central and Eastern Sydney<br/>PHN, Tower A, Level 5, 201 Coward St, Mascot NSW 2020, Australia,<br/><a href="mailto:b.goodger@cesphn.com.au">b.goodger@cesphn.com.au</a>;</p> <p>Ian Hickie, ORCID (0000-0001-8832-9895), AM MD FRANZCP FASSA<br/>FAHM<br/>Co-Director, Health and Policy and Professor of Psychiatry, NHMRC<br/>Senior Principal Research Fellow, The University of Sydney, Faculty of<br/>Medicine and Health, Brain and Mind Centre, Level 4, Building F, 94<br/>Mallett Street, Camperdown, NSW 2050, Australia, <a href="mailto:ian.hickie@sydney.edu.au">ian.hickie@sydney.edu.au</a>;</p> <p>Alyssa Milton, ORCID (0000-0002-4326-0123), BSc, MAppSc, PhD<br/>Post-doctorate researcher, The University of Sydney, Faculty of Medicine<br/>and Health, Level 5, Professor Marie Bashir Centre, Missenden Road,<br/>Camperdown, NSW 2050, Australia, <a href="mailto:Alyssa.Milton@sydney.edu.au">Alyssa.Milton@sydney.edu.au</a>;</p> |
| Corresponding author  | Diana Naehrig, The University of Sydney, Faculty of Medicine and Health,<br>Level 5, Professor Marie Bashir Centre, Missenden Road, Camperdown,<br>NSW 2050, Australia, <a href="mailto:dnae2050@uni.sydney.edu.au">dnae2050@uni.sydney.edu.au</a>                                                                                                                                                                                                                                                                                                                                                                                                                                                                                                                                                                                                                                                                                                                                                                                                                                                                                                                                                                                                                                                                                                                                                                                                                                                                                                                                                                                                                                                                                                                                                                                                                                                                                                                                                                                                                                                                                                                                                                                                                                                                                                                                                           |
| Word count manuscript | 4098/4000                                                                                                                                                                                                                                                                                                                                                                                                                                                                                                                                                                                                                                                                                                                                                                                                                                                                                                                                                                                                                                                                                                                                                                                                                                                                                                                                                                                                                                                                                                                                                                                                                                                                                                                                                                                                                                                                                                                                                                                                                                                                                                                                                                                                                                                                                                                                                                                                    |

## ABSTRACT

### Objectives

The wellbeing of doctors is recognised as a major priority in health care, yet there is little research on how General Practitioners (GPs) keep well. This is of particular importance considering the role that GPs play in population health, with an increasing demand for primary healthcare services from an aging population. We aimed to explore the determinants of GPs' wellbeing.

### Design

Semi-structured qualitative interviews.

From March to September 2021, we interviewed GPs working in numerous settings, using snowball and purposive sampling to expand recruitment across Australia. 20 GPs participated individually via Zoom. A semi-structured interview-guide provided a framework to explore wellbeing from a personal, organisational, and systemic perspective, including the recent challenges presented by COVID-19. Recordings were transcribed verbatim, and inductive thematic analysis was performed.

### Results

Eleven female and nine male GPs with diverse experience, from urban and rural settings were interviewed (mean 32 minutes). Determinants of wellbeing were underpinned by GPs' sense of identity. This was strongly influenced by GPs seeing themselves as a distinct but often undervalued profession working in small organisations within a broader health system. Financial aspects emerged as important moderators of the inter-connections between these themes. A complex balancing act between all determinants of wellbeing was evidenced.

### Conclusions

Conceptualising determinants and understanding their inter-connections can inform future strategies, and interventions. Finances need to be a major consideration to prioritise, promote, and support GP wellbeing, and a sustainable primary care workforce.

### Keywords

Wellbeing, determinants, general practitioner, family practitioner, primary health care, qualitative research.

### *Ethics approval statement*

This study was approved by the University of Sydney Human Research and Ethics Committee (2020/822).

### *Funding source*

Dr Diana Naehrig is funded through the Raymond Seidler PhD scholarship.

## STRENGTHS AND LIMITATIONS OF THIS STUDY

### Strengths

- A well and thriving generalist workforce is crucial to sustained population health. A qualitative exploration adds rich and nuanced information to better understand the determinants of GPs' wellbeing, and their complex interactions.
- It is necessary to understand drivers and barriers of wellbeing in view of developing strategies to better support and enable GP wellbeing.
- Our sample of twenty interviewees includes GPs working in a wide range of clinical settings in Australia. In addition, half of these GPs have worked and trained overseas including the UK, NZ, Africa, the Indian subcontinent, and the Middle East.

### Limitations

- Our results reflect the lived experience of twenty GPs, and these findings may not be generalisable to all GPs, particularly those working outside of the Australian context.
- Selection bias needs to be considered in any voluntary research participation.

## INTRODUCTION

Wellbeing of health care professionals has been recognised as a priority, and key component of the wider goals for health care in the USA, and Canada (1-4). General practice crucially provides cost-effective care to an aging population with chronic and complex health needs, and demand for generalist services outweighs supply in many countries, particularly in the UK, and USA (5-8).

In Australia, the 'National medical workforce strategy' aims to develop and coordinate a joint vision to provide effective, universally accessible, and sustainable health care across the entire population (9). Doctor wellbeing, and insufficient generalist capacity, have been identified as top concerns that need to be addressed besides maldistribution, and imbalance of specialities within the medical workforce (9, 10). Despite growing numbers of GPs nationally (11, 12), and GPs per capita (12), the availability of GPs in Australian major cities outstrips that of non-metropolitan areas (11). Together with a longstanding dearth of GPs in rural and remote areas (11, 13), this leaves parts of the population chronically underserved. Global

1  
2  
3 factors including an aging GP workforce, a trend for reducing work hours, a shift towards  
4 more women entering GP training also afflict Australia (14-16). A decline in Royal  
5 Australian College of General Practice (RACGP) applications and filled training places (14),  
6 and a waning interest in general practice from surveyed medical students (17), may well  
7 exacerbate the issue.  
8  
9

10  
11 The additional strain of the current pandemic (18) highlights the need for a thriving GP  
12 workforce, and GPs' wellbeing is more important than ever. Professional organisations  
13 endeavour to address wellbeing (i.e., RACGP programmes and resources (19, 20)), yet there  
14 is remarkably little evidence on how to increase GP wellbeing (21). Our recent systematic  
15 review of both trials and policy changes showed interventions are typically aimed at the  
16 individual GP, involve mindfulness practice, and show low to moderate effectiveness. Very  
17 few interventions target organisations, or health systems (21).  
18  
19  
20  
21  
22  
23  
24

## 25 **OBJECTIVES**

26  
27 A robust and sustainable generalist workforce is important. To improve GP wellbeing, we  
28 must first know how GPs conceptualise wellbeing and what determines it, to then establish  
29 how to bolster this. We aimed to explore GPs' perspectives of wellbeing and key, potentially  
30 modifiable, factors that determine it.  
31  
32  
33  
34  
35

## 36 **METHODS**

### 37 *Qualitative approach and research design*

38 We applied a six-step qualitative thematic analysis (22-25), providing a flexible and  
39 accessible way of analysing qualitative data, enabling iterative exploration of patterns and  
40 relationships between different themes whilst ensuring research rigour.  
41  
42

43 The six steps included: 1) familiarising with data; 2) generating initial codes; 3) searching for  
44 themes and subthemes; 4) reviewing themes; 5) refining, defining and naming themes; and 6)  
45 writing the report (25).  
46  
47

48 We used an inductive data-driven (bottom-up), and a critical realist epistemological approach  
49 to our analysis (26). A COREQ (27) reporting checklist is provided.  
50  
51  
52  
53

### 54 *Researcher characteristics and reflexivity*

55 Our research team (four females and three males) consisted of a PhD candidate with  
56 background in medicine and coaching psychology (DN); two GPs, one (BG) a representative  
57 of a Primary Health Network (PHN), a GP led organisation responsible for the primary care  
58  
59  
60

1  
2  
3 of a large geographical location typically serving a few hundred thousand people, and a  
4 representative (LA) of a national private GP organisation; two psychiatrists (NG, IH); a  
5 psychologist/researcher (AM), and a researcher (CK) both with extensive qualitative  
6 expertise. Collaborating with GPs within our research team enabled reflexivity across  
7 personal, professional, organisational and systemic experiences (28).  
8  
9  
10  
11  
12

### 13 *Context & sampling strategy*

14 Recruitment was aimed at GPs, and GP registrars working clinically in Australia. We chose a  
15 maximum variation sampling approach (29, 30), and purposely engaged PHNs and a private  
16 GP organisation to announce our study in e-newsletters and communications. Furthermore,  
17 we utilised flyers, social media, and snowballing.  
18  
19  
20  
21  
22

### 23 *Patient and Public involvement*

24 Patients and public were not involved in the design or conduct of this research project.  
25  
26  
27  
28

### 29 *Ethical issues*

30 Participation was voluntary. All participants received a participant information sheet and  
31 provided consent prior to being interviewed. The University of Sydney HREC approved this  
32 study (2020/822).  
33  
34  
35  
36  
37

### 38 *Data collection & management*

39 DN interviewed GPs one-on-one online in password protected Zoom conferencing rooms. A  
40 semi-structured topic guide (Supplement 1) - developed by the entire team - provided a  
41 framework, whilst allowing for further explorative questions. Interview topics included  
42 demographic information about participants, GPs' conceptualisation of wellbeing, factors  
43 promoting their wellbeing on a personal, organisational and systems level, the impact of  
44 culture in health care on wellbeing, accessing information and support to assist with their  
45 wellbeing, and the impacts of COVID-19 on their wellbeing. We planned 20 interviews with  
46 the potential for further interviews. After independent analysis of half the transcripts (DN,  
47 CK) no new codes or themes were identified (31). Interviews were continued to capture GPs  
48 from various geographical locations and experience levels. No additional themes emerged,  
49 meeting the criteria for thematic data saturation (32). We concluded at 20 participants as  
50 intended.  
51  
52  
53  
54  
55  
56  
57  
58  
59  
60



1  
2  
3 Interviews were audio-recorded, and securely managed on University of Sydney research  
4 servers. Verbatim transcripts were checked for accuracy against original recordings and de-  
5 identified by DN before analysis.  
6  
7  
8  
9

### 10 *Data analysis*

11 Inductive thematic analysis (25) was facilitated by Nvivo12 software (33). DN, CK, AM, NG  
12 engaged in steps 1) to 3) as described above, based on three different, randomly selected  
13 transcripts that were allocated to each researcher. DN developed a preliminary codebook in  
14 consultation with the research team with themes and subthemes (step 4), and coded all  
15 transcripts using NVivo (33). CK independently reviewed all transcripts and double coded  
16 half of them. Inter-coder variability (34) ranged from  $k = 0.48$  to  $k = 0.99$  depending on the  
17 theme, providing the basis for further dialogue, reflexivity, and theme development (step 4  
18 and 5). The codebook was iteratively refined throughout the process (DN, CK), and by  
19 triangulation with AM and NG (step 5); detailed descriptions of all codes were developed.  
20 For step 6, reporting of results, see below.  
21  
22  
23  
24  
25  
26  
27  
28  
29

## 30 **RESULTS**

31  
32  
33  
34 From March to September 2021, we interviewed 20 GPs (mean duration of 32 minutes; range  
35 20 - 43 minutes) with diverse experience levels, backgrounds, geographical, and work  
36 arrangements (Table 1).  
37

38  
39 We identified three major themes: participants' conceptualisation of wellbeing; determinants  
40 of wellbeing; and strategies for wellbeing. Running through each was a current focus on  
41 COVID-19 influences and impacts on GPs' wellbeing. Determinants of wellbeing discussed  
42 in the interviews were charted (Figure 1), and important interconnections were analysed.  
43  
44  
45  
46  
47

### 48 *Identity*

49 Determinants of wellbeing were related to GPs' identity as a person, and as a professional  
50 with many seeing themselves as 'wellbeing experts' especially for physical and mental  
51 aspects of wellbeing (Table 2a). Personal determinants included exercise, sleep, nutrition,  
52 social and community connection, leisure activities, spiritual practice, and a 'sense of  
53 balance' overall (Table 2b) determined by participants beliefs, intentions, and behaviours.  
54  
55 However, several participants stated not (always) heeding the wellbeing advice they gave  
56 their patients.  
57  
58  
59  
60

1  
2  
3 *'...I've come to realise, actually, that what I'm imparting is good advice, but I need to*  
4 *follow it myself as well, because it does make sense, and it does improve my wellbeing*  
5 *as well. So, yeah, I think as GPs, I'm not sure we always do what's right for ourselves,*  
6 *you know, compared to what we impart to our patients.'* (GP15)  
7  
8  
9

10  
11 A strong professional identity - defined by a sense of duty, responsibility, and high self-  
12 expectations - was ubiquitous. GPs also saw themselves as high achieving, able and resilient  
13 (Table 2c).  
14

15  
16 *'From an identity point of view, ... being a doctor sometimes subsumes my identity,*  
17 *and it's an important part of my identity. And therefore, my contentment at work and*  
18 *my recognition as a doctor, and the satisfaction I get at work impact on my identity as*  
19 *a doctor...'* (GP14)  
20  
21  
22  
23

24  
25 *'You know, you've just got to be professional. Doesn't matter how you're feeling,*  
26 *doesn't matter what's happening. Work is work. And, if you don't, bad things happen.'*  
27 (GP5)  
28  
29  
30

31  
32 Variation in the type of work carried out was another personal determinant of keeping well,  
33 both through avoiding monotony and isolation, and by temporarily relinquishing the burden  
34 of patient responsibility (i.e., having academic days, pursuing teaching and management, or  
35 assisting surgeons in theatre) (Table 2d).  
36

37  
38 Having a mentor or supervisor who modelled how to maintain personal wellbeing was seen  
39 as important to learning how to prioritise personal wellbeing, particularly for GP registrars.  
40

41  
42 *'...I think we need to be modelling. Because I think if people are going through the*  
43 *training and not experiencing any different, we shouldn't be surprised that they then*  
44 *become like 30, 40, 50-year-old GPs who are totally burnt out, and have no sense of*  
45 *what's actually important for their self-care.'* (GP12)  
46  
47  
48  
49

50  
51 Determinants of professional wellbeing were offset by a sense of being perceived as 'less  
52 than' a specialist by the public, other doctors and often internalised by the GPs (Table 2e).  
53  
54

### 55 56 *Organisation*

57  
58 On the organisational/practice level, the most important factor determining personal  
59 wellbeing was team and peer support. This included mostly informal debriefs with colleagues  
60

1  
2  
3 about challenging patients, medical management, staff, or personal issues, and was facilitated  
4 by organisational practices encompassing physical (e.g., having a common tea-room), social  
5 (e.g., protected breaks, and collegial social activities), and work domains (e.g., efficient  
6 practice management, routine workflow, and infrastructure).  
7  
8  
9

10 *'Ahh, having a good bunch of people to work with, people who are working together*  
11 *in an environment that is safe, there is timetabling of patients, that we are able to*  
12 *have a tea break, toilet break, lunch break, and be able to respond to patients' needs*  
13 *as they arise, at the same time. That is important in a clinical setting.'* (GP3)  
14  
15  
16  
17

18 GPs perceived working in competitive or negative team climates as highly detrimental to  
19 their wellbeing (Table 2f). This was more often expressed by participants in metropolitan  
20 practices, where practices reportedly skimp on tea-rooms, and doctors routinely work through  
21 lunch breaks due to financial strains related to significantly higher living expenses than in  
22 regional/rural areas (Table 2g).  
23  
24  
25

26 Again, the effect of mentorship and role modelling was important. Effective practice  
27 leadership was helpful, whereas a lack of management understanding was detrimental.  
28  
29  
30

31 High workload and the pressure to see patients, sometimes coupled with insufficient staffing  
32 were frequently cited as barriers to wellbeing.  
33  
34  
35

36 *'...I feel that there is a real sausage factory sort of approach to it in Sydney. It's just*  
37 *bang, bang, bang, go, go, go.'* (GP12)  
38  
39  
40

41 Additionally, unrealistic patient expectations, including to receive services for free, was  
42 frequently mentioned.  
43  
44

45 *'...You see a number of patients that basically see you as the local Coles*  
46 *[supermarket]. "OK, doctor, I need my prescription, and I need my referral..." And*  
47 *you know, you are just a dispensing machine, an ATM. And it doesn't cost them*  
48 *anything because you are bulk billing.'* (GP14)  
49  
50  
51

52  
53 *'Patients think that they can come in, and see you, and have a great amount of things*  
54 *dealt with. And if you deal with three of the sixteen things, they walk away feeling*  
55 *unhappy, even though they've booked 15 minutes [consultation].'* (GP20)  
56  
57  
58  
59  
60

### *Profession*

This included determinants of wellbeing originating from within the GP community, and their representative bodies. Many interviewees were dissatisfied with their professional college because they felt ill-represented, or even that the college was actively working against them. Consequently, several participants withdrew their college membership. GPs were either only vaguely aware of college support resources for wellbeing, or, frankly, weren't interested.

*'And I do find that the college completely useless at sticking up for GPs. I refuse to join them. I find them very frustrating. They don't, in my opinion, act as a good voice for us. So, mostly I work around them.'* (GP6)

The college representing rural practitioners, GP training organisations, and Primary Health Networks (PHNs) were seen to offer more tangible support, although this had suffered during COVID-19.

### *Health Care System*

The theme most frequently emphasised by GPs during the interviews was a sense of not being valued, and a lack of appreciation, respect, and support. Whilst this mostly related to the systems level, it was found throughout, and attributed to almost every section of society.

*'And I think the government just think we are a disorganised bunch, and who we can just brush aside, and they will go the extra mile for their patients... Unless GPs get organised, and more militant, then we're just going to be ground.'* (GP9)

Participants expressed, that others' lack understanding of what a GP does on a daily basis, and the importance GPs play in the provision of population health (Table 2h).

*'I think if more people had a concept of what general practice actually can do, and what it does, there would be a lot more respect.'* (GP17)

This lack of understanding was exemplified by limited GP consultation by the government concerning the Covid-19 response, and vaccination rollout.

*'...With the vaccination programme...we weren't regarded as frontline workers, and we did Covid testing. We treat people with respiratory illness. And so, that was kind of - I think that was a diminishing thing, really, apart from you know, not feeling protected.'* (GP16)

1  
2  
3  
4  
5 This was compounded by the fear of billing audits by Medicare (definition, Supplement 2),  
6 formal patient complaints (Table 2i), litigation threats, and bad media press.

7  
8 *'Well, I think the Medicare audits – although I've been lucky enough not to receive an*  
9 *audit letter yet – I think that has sent ... a whole load of fear through a lot of GPs*  
10 *who've tried to do the right thing'. (GP11)*

11  
12  
13  
14  
15 *'The other thing that can affect you, is probably if you get a few patient complaints to*  
16 *HCCC and AHPRA, or to the board. That actually brings your morale down quite a*  
17 *lot. It's one of the easiest things to complain against a doctor. You know, we're all*  
18 *soft targets.'* (GP13).

19  
20  
21  
22  
23  
24 Over-specialisation (Table 2e) and GP shortages, as well as working in silos, rather than hand  
25 in hand (i.e., with other healthcare providers, between federal and state agencies) were  
26 mentioned by a small proportion of GPs.

### 27 28 29 30 31 *Finances*

32 Financial aspects were interlinked with all themes, and directly and indirectly determined  
33 wellbeing (Figure 2). Two drivers were external, one was internal: Firstly, Medicare rebate  
34 structure that determined fee for services (Supplement 2) was closely tied to a sense of being  
35 valued, and personal wellbeing. Secondly, fee structure drove patient behaviour, which  
36 impacted on GPs overall and financial wellbeing. And thirdly, remuneration influenced GPs'  
37 behaviour. In our sample, several GPs responded to low rebate structure and high patient  
38 expectations with increasing patient throughput and foregoing work breaks, with implications  
39 for their wellbeing.

40  
41  
42  
43  
44  
45  
46  
47  
48 Remuneration was perceived as a direct reflection of the value of a profession, a service, and  
49 a proxy for the outright value of a GP individually.

50  
51 *"...To me, so, I'm really sort of fed up [with the Medicare rebate] - disillusioned with*  
52 *- where we're at this stage, you know. And that, doesn't help our wellbeing because*  
53 *we don't - we feel undervalued. And the government has done nothing to really, you*  
54 *know, show any positive change in that respect. So definitely, and I don't really know*  
55 *the way out of that, because, you know, even if they were to increase the rebate a*  
56 *small amount, it still doesn't really reflect, you know, the amount of effort that we put*  
57  
58  
59  
60

1  
2  
3 *in to our patients, and the preventative side of things, I mean the amount of work*  
4 *we're doing to prevent hospitalisations and, all of that sort of thing.'* (GP15)  
5  
6  
7

8 GPs voiced frustration with the cutbacks of billable Medicare items (Supplement 2) crucial to  
9 general practice, and the impact that had on their wellbeing.

10  
11 *'But the wellbeing that GPs achieve, is by their own measures, and they are to*  
12 *counteract the negative pressures that come from outside this [consult] room. So ...*  
13 *the forces that are negative, are Medicare, and the way GPs are treated. Like the*  
14 *telehealth items are just going to be cut... ECGs [electro-cardiograms], that item was*  
15 *just cut. Joint injections, they were just cut.'* (GP9)  
16  
17  
18  
19  
20  
21

22 GPs described two factors that influenced their income: the volume of patients seen; and  
23 how, and what they billed. High patient throughput was sometimes driven by practice  
24 owners, but more often by personal financial pressures. Particularly, when the GP was the  
25 main breadwinner, lived in a metropolitan area, and/or the practice bulk billed only, there was  
26 significant pressure to see as many patients as possible. For example, one participant saw  
27 over one thousand bulk billed patients per month. Some GPs charged patient gap payments  
28 above the Medicare rebate, to reflect the value they attributed to their expertise and services  
29 (Table 2j). Whilst others reported a reluctance to privately bill their patients, or unwillingness  
30 to argue with patients over charging the gap between private and bulk billing (Table 2k).  
31 'Time is money' was a frequently reported concept, which directly impacted on some GPs'  
32 willingness to work less, and spend time on activities that they knew improved wellbeing,  
33 such as taking breaks, engaging in reflective practice, or attending peer review groups.  
34  
35  
36  
37  
38  
39  
40  
41  
42

43 *'Fundamentally, I think the issue is ... the way that we're paid. And because we only*  
44 *generate billings when we're seeing patients it just sort of warps your whole view of,*  
45 *you know, what's worthwhile doing.'* (GP12)  
46  
47  
48  
49

50 According to one participant, GPs were ill-informed about Medicare's billing structure  
51 available to general practice (Table 2l). Indeed, several interviewees stated not being well  
52 versed or interested in financial management, so some deliberately engaged an accountant.  
53 For GP registrars the financial pressures were compounded, as they are salaried, and  
54 remuneration is typically lower than for a fully qualified GP. Unpaid maternity leave was a  
55 relevant consideration (Table 2m), however, high autonomy and flexible working  
56  
57  
58  
59  
60

1  
2  
3 arrangements were specifically stated by women as key benefits of going into general  
4 practice (Table 2n).  
5  
6  
7

8 Overall, what was most striking, was the tension and complex balancing act required between  
9 all determinants, at the centre of which stood the individual GP. We didn't observe a  
10 simplistic 'work-life balance', i.e., predicted on reducing hours and demands at 'work' to  
11 enable more 'life'. In this cohort much of GPs' sense of self - and wellbeing - lay in how they  
12 viewed themselves professionally, including their working life. Seen through this lens, it  
13 becomes clear that simple interventions, i.e., to offer resilience and wellbeing seminars will  
14 not suffice (Table 2o).  
15  
16  
17  
18  
19  
20  
21  
22

## 23 **DISCUSSION**

### 24 *Summary*

25  
26  
27  
28 GPs reported determinants of wellbeing (Figure 1), and provided numerous examples of the  
29 tension they navigate between competing interests: their own, as well as those imposed by  
30 others. If the balance is off kilter, wellbeing suffers.  
31  
32

33  
34 Facilitators included positive self-perception and outlook; taking an interest in, and  
35 prioritising wellbeing; variation, flexibility, and autonomy in choosing how to work; peer  
36 support and collegiality; and a well organised practice workflow. Barriers included financial  
37 pressure offset by increased patient throughput and minimising break and recreation time;  
38 patient expectations and inability to set boundaries; fear of complaints and audits; lack of  
39 representation/advocacy from professional bodies; and overwhelmingly, insufficient system  
40 support reflected through funding cuts, and lack of GP consultation in policy decision-  
41 making (including COVID-19 response strategy).  
42  
43  
44  
45  
46  
47

48 GP wellbeing - or lack thereof - is a complex interplay between different determinants and  
49 stakeholders. The main, underlying determinant of wellbeing - correlated with, and  
50 represented by remuneration - seems to be inadequate professional value and recognition. If  
51 GPs and their services are undervalued, personally and professionally, it depletes their  
52 wellbeing. GPs largely counter-balance this personally as best they can, and crucially,  
53 through informal peer support. When these mechanisms are exhausted or impossible,  
54 wellbeing quickly deteriorates. Furthermore, several GPs compensate low remuneration,  
55  
56  
57  
58  
59  
60

1  
2  
3 inadequate professional recognition, and high patient demand with means detrimental to their  
4 wellbeing (i.e., by working harder, Figure 2).

5  
6 GPs' inherent resilience, ability, and sense of duty are in large parts responsible for good  
7 health outcomes. However, for many it may be a delicate balance, one that expends much  
8 energy, and hence likely isn't sustainable indefinitely. Above mechanisms may also explain  
9 why resilience and mindfulness interventions are not overly effective (21), nor welcomed by  
10 practitioners. GPs are the backbone of primary healthcare, and yet this service appears to rely  
11 on GPs' good-will, and professional dedication. Primary care is the most (cost-) effective  
12 avenue to manage population health (35), hence policy makers must do their utmost to value  
13 and enable GPs, particularly given the added strain, and GPs role, during the pandemic.  
14  
15  
16  
17  
18  
19  
20  
21

### 22 *Comparison with existing literature*

23  
24 There appears to be little qualitative research explicitly about GPs' satisfaction, and none to  
25 our knowledge on wellbeing. The European General Practice Research Network interviewed  
26 183 GPs across eight countries. Factors that promote job satisfaction were freedom to  
27 organise and choose their practice environment; professional education; and establishing  
28 strong patient-doctor relationships (36). Interestingly, patient-doctor relationships and  
29 professional education were not mentioned in our cohort. It was more a case of patient  
30 expectations being detrimental to wellbeing, and role modelling for registrars being useful.  
31 Female rural family doctors in the USA were interviewed regarding practice attributes that  
32 promote satisfaction, whereby supportive professional relationships were crucial (37). Our  
33 interviewees described the importance of professional peer support, and particularly women  
34 appreciated the autonomy and flexibility to choose when, and where to work.  
35

36 In the UK, a qualitative study examined why GPs leave direct patient care. Reasons were  
37 complex, but in alignment with our cohort, included personal and professional identity issues,  
38 the value perception of general practice within the health system, and risk (i.e., medical  
39 litigation) (38). In our interviews, stress of formal patient complaints and audits surfaced  
40 repeatedly.  
41

42 A systematic review thematically analysed studies broadly focusing on positive factors  
43 related to general practice. They discerned general medical workforce themes, general  
44 practice specific themes, and professional/personal issues impacting on GP satisfaction in  
45 clinical practice (39). Subthemes included balance between income and workload; flexibility,  
46 variety, and freedom to choose work; responsibility, competency, recognition; positive self-  
47 image, personality, and values; and relationships with community, patients, carers, and other  
48  
49  
50  
51  
52  
53  
54  
55  
56  
57  
58  
59  
60



1  
2  
3 professionals (39). So overall, previous qualitative research in different contexts demonstrate  
4 preliminary alignment with our results.  
5  
6  
7

8 Our data also shows similarities with quantitative data on life and job satisfaction,  
9 particularly regarding remuneration, value, and the strain of maintaining balance. The  
10 'Medicine in Australia – Balancing Employment and Life' (MABEL) surveys, were  
11 conducted annually from 2008 to 2018 with yearly participant numbers of >3000 GPs (11,  
12 40-47), and the RACGP regularly commissions surveys, and reports (14, 48). GPs are most  
13 satisfied with variety and choosing how to work, least satisfied with remuneration and  
14 recognition, and about half of surveyed GPs report that maintaining work-life balance is a  
15 challenge (14, 46, 48, 49). Over several years, >40% of GPs have identified Medicare rebates  
16 as a top priority for policy action (14). Positive associations for job satisfaction in all doctor  
17 types include doctor characteristics (age close to retirement, Australian trained, good health);  
18 social characteristics (living with a partner, social interaction); and job characteristics (part-  
19 time work, opportunities for professional development, support networks, realistic patient  
20 expectations) (42, 43).  
21  
22  
23  
24  
25  
26  
27  
28  
29

30 Whilst surveys highlight correlations, they do not demonstrate causation. Our nuanced,  
31 qualitative exploration sheds light on multiple determinants of GPs' wellbeing and, most  
32 importantly, how they are interrelated.  
33  
34  
35  
36  
37

### 38 *Strengths and limitations*

39 Strengths include the diversity of participants and their combined wealth of experience  
40 (Table 1). GPs rich and nuanced recounts enabled in-depth analysis of determinants of their  
41 personal wellbeing.  
42  
43

44 Limitations include selection bias often inherent in qualitative research with voluntary  
45 participation. We purposely only included GPs working in Australia for practicability  
46 reasons, and local relevance. These results may not equally apply to GPs working elsewhere,  
47 different factors may be present for GPs in other countries, particularly around funding  
48 structures and policy.  
49  
50  
51  
52  
53  
54

### 55 *Implications for research and/or practice*

56 To prioritise GP wellbeing, we need to understand determinants and how they interplay. GPs  
57 expend effort to navigate internal and external forces that impact on their wellbeing.  
58  
59  
60

1  
2  
3 Our data suggests it does not suffice to address the individual GP by offering wellbeing  
4 workshops to them. Instead, organisational, and professional structures need to be targeted  
5 and this will require policy advocacy. The determinants that need to change in order to  
6 fundamentally shift the perceived value of general practice, and avoid band-aid solutions  
7 must be prioritised. Strategies to advance these issues were raised in the interviews, and are  
8 detailed in our subsequent publication.  
9

10  
11 Regarding research implications, we recommend a focus on organisational, professional, and  
12 systemic interventions. This is more complex and costly than interventions on the individual  
13 (GP) level, but presumably more useful and sustainable. Research into interventions for  
14 health care professionals necessitates the same dedication and funding as research aimed at  
15 improving patient outcomes because a general practitioner who is well and satisfied, is better  
16 equipped to provide quality care to others.  
17  
18  
19  
20  
21  
22  
23  
24

## 25 **CONCLUSION**

26  
27 GPs are walking a tight rope that requires careful balance between complex and  
28 interconnected determinants of wellbeing, whereby value, remuneration, and peer support are  
29 crucial.  
30

31  
32 Organisations, professional bodies, and policy makers have an untapped opportunity to  
33 enable and support GPs' wellbeing, with benefits to practitioners, their families, their  
34 patients, the sustainability of the general practice workforce, and population health.  
35  
36  
37  
38

## 39 **ACKNOWLEDGMENTS**

### 40 *Acknowledgements*

41  
42 First and foremost, we would like to thank all participants for sharing their time and insights.  
43 We would like to acknowledge the support extended by the Central and Eastern Sydney  
44 Primary Health Network, New South Wales; the Murray Primary Health Network, Victoria;  
45 and Healius Pty Ltd, Australia.  
46  
47  
48  
49

### 50 *Registration*

51  
52 Not applicable.  
53

### 54 *Ethics approval statement*

1  
2  
3 This study was approved by the University of Sydney Human Research and Ethics  
4 Committee (2020/822).  
5  
6  
7

#### 8 *Funding statement*

9  
10 Dr Diana Naehrig was supported through the Raymond Seidler PhD scholarship. The funding  
11 source had no influence on the study design, collection, analysis or interpretation of data, the  
12 writing of the manuscript nor the decision to submit the article for publication. Award/Grant  
13 number is not applicable.  
14  
15  
16  
17

#### 18 *Competing interest statement*

19  
20 Beyond the Raymond Seidler PhD scholarship for Diana Naehrig there was no support from  
21 any organisation for the submitted work. Ian Hickie has competing interests to declare. All  
22 other authors have no competing interests to declare.  
23  
24  
25  
26

#### 27 *Authors' Contributions*

28  
29 DNA is the guarantor and corresponding author and attests that all listed authors meet  
30 authorship criteria and that no others meeting the criteria have been omitted. All authors  
31 contributed to the study conception and design, dissemination, and revision of the final  
32 manuscript. DN collected the data. DN, CK, AM, NG analysed the data, and drafted the  
33 manuscript. All authors critically revised and approved the final version of the manuscript to  
34 be published.  
35  
36  
37  
38  
39  
40  
41

#### 42 *Transparency declaration*

43  
44 Dr Diana Naehrig (the manuscript's guarantor) affirms that the manuscript is an honest,  
45 accurate, and transparent account of the study being reported.  
46  
47  
48

#### 49 *Data sharing statement*

50  
51 We will consider sharing de-identified data upon reasonable request.  
52  
53

#### 54 *Copyright*

55  
56 Dr Diana Naehrig (corresponding author) has the right to grant on behalf of all authors and  
57 does grant on behalf of all authors, an exclusive licence on a worldwide basis to the BMJ  
58 Publishing Group Ltd to permit this article to be published in BMJ editions and any other  
59  
60

1  
2  
3 BMJPGGL products and sublicences such use and exploit all subsidiary rights, as set out in our  
4 licence.  
5  
6  
7  
8  
9

10 Figure 1. Determinants of wellbeing in General Practitioners and their interaction.  
11  
12

13 Figure 2. Mechanisms of the negative impact of finances on the wellbeing of General  
14 Practitioners.  
15  
16  
17  
18  
19  
20  
21  
22  
23  
24  
25  
26  
27  
28  
29  
30  
31  
32  
33  
34  
35  
36  
37  
38  
39  
40  
41  
42  
43  
44  
45  
46  
47  
48  
49  
50  
51  
52  
53  
54  
55  
56  
57  
58  
59  
60

For peer review only

## REFERENCES

1. Wallace JE, Lemaire JB, Ghali WA. Physician wellness: a missing quality indicator. *The Lancet*. 2009;374(9702):1714-21.
2. Dunn PM, Arnetz BB, Christensen JF, Homer L. Meeting the imperative to improve physician well-being: Assessment of an innovative program. *J Gen Intern Med*. 2007;22(11):1544-52.
3. Luchterhand C, Rakel D, Haq C, Grant L, Byars-Winston A, Tyska S, et al. Creating a Culture of Mindfulness in Medicine. *Wmj*. 2015;114(3):105-9.
4. Spinelli WM. The phantom limb of the triple aim. *Mayo Clin Proc*. 2013;88(12):1356-7.
5. Addicott R, Maguire D, Honeyman M, Jabbal J. Workforce planning NHS Kings Fund. London: The King's Fund; 2015.
6. Nussbaum C, Massou E, Fisher R, Morciano M, Harmer R, Ford J. Inequalities in the distribution of the general practice workforce in England: a practice-level longitudinal analysis. *BJGP Open*. 2021.
7. Abel GA, Gomez-Cano M, Mustafee N, Smart A, Fletcher E, Salisbury C, et al. Workforce predictive risk modelling: development of a model to identify general practices at risk of a supply-demand imbalance. *BMJ Open*. 2020;10(1):e027934.
8. Sandhu D, Blythe A, Nayar V. How can medical schools create the general practice workforce? An international perspective. *MedEdPublish*. 2020;9(1).
9. National Medical Workforce Strategy - Investing in our medical workforce to meet Australia's health needs. The Department of Health, Australian Government; 2021.
10. National Medical Workforce Strategy - Scoping Framework. Canberra: Australian Government. Department of Health.; 2019.
11. Scott A. The evolution of the medical workforce. ANZ Health Sector Report: Melbourne Institute: Applied Economic and Social Research, The University of Melbourne; 2021 03/06/2021.
12. General Practice Workforce providing Primary Care services in Australia. Statistics by calendar year 2014 - 2019. Canberra: Australian Government. Department of Health.; 2020.
13. Scott A, Witt J, Humphreys J, Joyce C, Kalb G, Jeon SH, et al. Getting doctors into the bush: general practitioners' preferences for rural location. *Soc Sci Med*. 2013;96:33-44.
14. RACGP. General Practice: Health of the Nation 2020. East Melbourne, Vic: The Royal Australian College of General Practitioners. ; 2020.
15. Medical Education and Training (MET) - 4th edition. Canberra: Australian Government. Department of Health.; 2019.
16. Beech J, Bottery S, Charlesworth A, Evans H, Gershlick B, Hemmings N, et al. Closing the gap. The Health Foundation. The King's Fund. Nuffield Trust.; 2019.
17. MSOD. National Data Report 2020, 2015-2019, Data from Final Year Medical Students at Australian Medical Schools. Medical Deans Australia and New Zealand. Medical Schools Outcome Database.; 2020.
18. Scott A. The impact of COVID-19 on GPs and non-GP specialists in private practice. The University of Melbourne.: Melbourne Institute of Applied Economic and Social Research.; 2020.
19. RACGP. The Royal Australian College of General Practitioners. Annual report 2019–20. . East Melbourne, Vic: RACGP; 2020.
20. RACGP. GP wellbeing Royal Australian College of General Practitioners Website. 2021 [Available from: <https://www.racgp.org.au/running-a-practice/practice-management/gp-wellbeing>].

21. Naehrig D, Schokman A, Hughes JK, Epstein R, Hickie IB, Glozier N. Effect of interventions for the well-being, satisfaction and flourishing of general practitioners-a systematic review. *BMJ Open*. 2021;11(8):e046599.
22. Braun V, Clarke V. What can "thematic analysis" offer health and wellbeing researchers? *Int J Qual Stud Health Well-being*. 2014;9:26152.
23. Braun V, Clarke V. Using thematic analysis in psychology. *Qualitative Research in Psychology*. 2006;3(2):77-101.
24. Clarke V, Braun V. Thematic analysis. *The Journal of Positive Psychology*. 2016;12(3):297-8.
25. Braun V, Clarke V. Thematic analysis. *APA handbook of research methods in psychology, Vol 2: Research designs: Quantitative, qualitative, neuropsychological, and biological* 2012. p. 57-71.
26. Archer M, Bhaskar R, Collier A, Lawson T, (eds) NA. *Critical realism: Essential readings* 2013.
27. Tong A, Sainsbury P, Craig J. Consolidated criteria for reporting qualitative research (COREQ): a 32-item checklist for interviews and focus groups. *International journal for quality in health care*. 2007;19(6):349-57.
28. Barry C, Britten N, Barber N, Bradley C, F. S. Using reflexivity to optimize teamwork in qualitative research. *Qual Health Res*. 1999(9):26-44.
29. Sandelowski M, Docherty S, Emden C. Focus on qualitative methods. Sample size in qualitative research *Research in Nursing & Health*. 1995;18:179-83.
30. Rice PL, Ezzy D. *Qualitative research methods: A health focus*. Melbourne, Australia. 1999.
31. Fusch PI, Ness LR. Are we there yet? Data saturation in qualitative research. *The Qualitative Report*. 2015;20(9):1408-16.
32. Francis JJ, Johnston M, Robertson C, Glidewell L, Entwistle V, Eccles MP, et al. What is an adequate sample size? Operationalising data saturation for theory-based interview studies. *Psychology and health*. 2010;25(10):1229-45.
33. NVivo 12: QSR International Pty Ltd.; 2020 [Available from: <https://www.qsrinternational.com/nvivo-qualitative-data-analysis-software/home>].
34. O'Connor C, Joffe H. Intercoder Reliability in Qualitative Research: Debates and Practical Guidelines. *International Journal of Qualitative Methods*. 2020;19.
35. Scott A, S. J. *Primary Care*. Oxford: Oxford University Press; 2011.
36. Le Floch B, Bastiaens H, Le Reste JY, Lingner H, Hoffman R, Czachowski S, et al. Which positive factors give general practitioners job satisfaction and make general practice a rewarding career? A European multicentric qualitative research by the European general practice research network. *BMC Fam Pract*. 2019;20(1):96.
37. Hustedde C, Paladine H, Wendling A, Prasad R, Sola O, Bjorkman S, et al. Women in rural family medicine: a qualitative exploration of practice attributes that promote physician satisfaction. *Rural Remote Health*. 2018;18(2):4355.
38. Sansom A, Terry R, Fletcher E, Salisbury C, Long L, Richards SH, et al. Why do GPs leave direct patient care and what might help to retain them? A qualitative study of GPs in South West England. *BMJ Open*. 2018;8(1):e019849.
39. Le Floch B, Bastiaens H, Le Reste JY, Lingner H, Hoffman RD, Czachowski S, et al. Which positive factors determine the GP satisfaction in clinical practice? A systematic literature review. *BMC Fam Pract*. 2016;17(1):133.
40. Scott A. *The impact of COVID-19 on GPs and non-GP specialists in private practice*. Melbourne Institute: Applied Economic & Social Research, The University of Melbourne; 2020.

- 1  
2  
3 41. Scott A. General Practice Trends. The University of Melbourne, Melbourne.:  
4 Melbourne Institute: Applied Economic and Social Research; 2017.  
5  
6 42. Joyce C, Wang WC. Job satisfaction among Australian doctors: the use of latent class  
7 analysis. *Journal of Health Services Research and Policy*. 2015;20(4):224-30.  
8  
9 43. Joyce CM, Schurer S, Scott A, Humphreys J, Kalb G. Australian doctors' satisfaction  
10 with their work: results from the MABEL longitudinal survey of doctors. 2011.  
11  
12 44. Joyce CM, Scott A, Jeon SH, Humphreys J, Kalb G, Witt J, et al. The "medicine in  
13 Australia: balancing employment and life (MABEL)" longitudinal survey--protocol and  
14 baseline data for a prospective cohort study of Australian doctors' workforce participation.  
15 *BMC Health Serv Res*. 2010;10:50.  
16  
17 45. Rodwell J, Gulyas A. A taxonomy of primary health care practices: An avenue for  
18 informing management and policy implementation. *Australian Journal of Primary Health*.  
19 2013;19(3):236-43.  
20  
21 46. Shrestha D, Joyce CM. Aspects of work–life balance of Australian general  
22 practitioners: determinants and possible consequences. *Australian Journal of Primary Health*.  
23 2011;17(1):40-7.  
24  
25 47. *Medicine in Australia: Balancing Employment and Life*,  
26 Australia's national longitudinal survey of doctors: Melbourne Institute, University of  
27 Melbourne; 2021 [Available from: <https://melbourneinstitute.unimelb.edu.au/mabel/home>.  
28  
29 48. RACGP GP Survey. Melbourne: EY Sweeney; 2020.  
30  
31 49. McGrail MR, Humphreys JS, Scott A, Joyce CM, & Kalb G. Professional satisfaction  
32 in general practice: does it vary by size of community? *Medical Journal of Australia*.  
33 2010;193(2):94-8.  
34  
35  
36  
37  
38  
39  
40  
41  
42  
43  
44  
45  
46  
47  
48  
49  
50  
51  
52  
53  
54  
55  
56  
57  
58  
59  
60

**Table 1. Demographics of interviewed General Practitioners (GPs)**

| Demographic                | N=20                       | Sub demographic                                                                                                                                                                                                                                                                           |
|----------------------------|----------------------------|-------------------------------------------------------------------------------------------------------------------------------------------------------------------------------------------------------------------------------------------------------------------------------------------|
| Sex                        | 11<br>9                    | Women<br>Men                                                                                                                                                                                                                                                                              |
| Experience                 | 2<br>2<br>4<br>4<br>4<br>4 | GP registrars (trainees)<br>GPs with 1 - 5 years of experience as a fellow<br>GPs with 6 - 10 years of experience as a fellow<br>GPs with 11 - 20 years of experience as a fellow<br>GPs with 21 - 30 years of experience as a fellow<br>GPs with 31 - 40 years of experience as a fellow |
| Current Location           | 15<br>3<br>1<br>1          | NSW (11 metropolitan, 4 regional)<br>VIC (2 metropolitan, 1 rural)<br>QLD (metropolitan)<br>SA (metropolitan)                                                                                                                                                                             |
| Previous location AUS      | 9                          | GPs had previously worked in Australian locations that included regional, rural, and remote settings across different states (NSW, QLD, VIC, SA, WA, NT).                                                                                                                                 |
| Previous location overseas | 10                         | GPs trained and / or worked overseas (including the United Kingdom, New Zealand, the Middle East, the Indian Subcontinent, and Africa).                                                                                                                                                   |
| Special interests          | 18                         | GPs had special interests including one or several of the following: rural medicine, aboriginal health, mental health, women's health, parental care, paediatrics, skin, eye health, sports medicine, veteran's health, prison health.                                                    |
| Other professional roles   | 10                         | GPs held other professional roles, sometimes including several of the following: academic (research & education), GP training, corporate & management, policy, medico legal, RACGP, ACRRM, practice accreditation, Australian defence force.                                              |
| Work arrangement           | 2<br>3<br>15               | GP registrars were salaried.<br>GPs currently were partners / principals in a practice, and several more had been practice-owners at some point during their career.<br>GPs provided clinical work as contractors, or have mixed arrangements depending on their roles.                   |
| Billing                    | 4<br>1<br>4<br>2<br>9      | Practices bulk billed only.<br>Practice billed privately only.<br>Practices had mixed billing.<br>Practices had other mixed means of funding (i.e., government grants)<br>Interviewees did not discuss practice billing structure.                                                        |

**Table 1.** NSW: New South Wales, VIC: Victoria, QLD: Queensland, SA: South Australia, WA: Western Australia, NT: Northern Territory, AUS: Australia, RACGP: Royal Australian College of General Practice, ACRRM: Australian College of Rural and Remote Medicine, bulk billing: Medicare rebates cover practitioner charges (no out of pocket fees for patients).



**Table 2. Determinants of Wellbeing - Verbatim Quotes**

| Quote    | Subtheme                                                                               | Verbatim Data (participant code)                                                                                                                                                                                                                                                                                                                                                                                                                                                                                                                                                                |
|----------|----------------------------------------------------------------------------------------|-------------------------------------------------------------------------------------------------------------------------------------------------------------------------------------------------------------------------------------------------------------------------------------------------------------------------------------------------------------------------------------------------------------------------------------------------------------------------------------------------------------------------------------------------------------------------------------------------|
| <b>a</b> | <b>Identity</b><br><br>Wellbeing beliefs and intentions                                | <i>'...I think it's probably a case of the medical profession has lost control of wellbeing and it's now the domain of Instagram influencers. ... I think wellbeing as a principle is what we've been trying to do for years.'</i> (GP9)                                                                                                                                                                                                                                                                                                                                                        |
| <b>b</b> | <b>Identity</b><br><br>Balance                                                         | <i>'So that's probably exercise, and eating healthy, and being with friends and family is probably what keeps me well. ... I suppose having your work / life in balance, and still being able to function at work at an optimal level, and still be able to maintain all your responsibilities outside of work, with family and recreation, I suppose. And being happy with both aspects of your life.'</i> (GP18)                                                                                                                                                                              |
| <b>c</b> | <b>Identity</b><br><br>Resilience                                                      | <i>'I expect myself to be more resilient [than others]. And I expect myself to cope with hardships.'</i> (GP8)                                                                                                                                                                                                                                                                                                                                                                                                                                                                                  |
| <b>d</b> | <b>Identity</b><br><br>Variation of work                                               | <i>'If I work five, six, seven days [per week] in a general practice it really starts to affect you mentally. So, mixing it up is a fantastic way of keeping sane.'</i> (GP5)                                                                                                                                                                                                                                                                                                                                                                                                                   |
| <b>e</b> | <b>Identity / System</b><br><br>Specialisation<br><br>Feeling 'less than' a specialist | <i>'The other things around the health system that I find very difficult and concerning, ... is the proliferation of sub-, sub-, super-specialists.... That puts an incredible strain on you as a GP because now suddenly, like a GP is supposed to know everything. ... You know, you're a sub-doctor in everything, or you're less of a doctor in everything because here these super-specialists telling you about the micro-details of how you should manage this one. But it also creates this huge gap. You're the generalist, and the next step is to this super-specialist.'</i> (GP14) |
| <b>f</b> | <b>Organisation</b><br><br>Lack of team & peer support                                 | <i>'I think that's one of the most common causes of stress, depression, and mental illnesses in other practices, not having a good relationship with other GPs. ... Belittling the other GP, and telling the patients that the other GP isn't good enough, or things like that. Or going against the medical advice of the other GP, even though that may have been correct, you know, trying to win over the patient, things like that.'</i> (GP13)                                                                                                                                            |

|   |                                                                                      |                                                                                                                                                                                                                                                                                                                                                                                                                                                                                                                                                                                                                                                                                                                                                                                                                                                                                                                                                                                                                                                                                                                                                                                                                                                                                                                                                                                              |
|---|--------------------------------------------------------------------------------------|----------------------------------------------------------------------------------------------------------------------------------------------------------------------------------------------------------------------------------------------------------------------------------------------------------------------------------------------------------------------------------------------------------------------------------------------------------------------------------------------------------------------------------------------------------------------------------------------------------------------------------------------------------------------------------------------------------------------------------------------------------------------------------------------------------------------------------------------------------------------------------------------------------------------------------------------------------------------------------------------------------------------------------------------------------------------------------------------------------------------------------------------------------------------------------------------------------------------------------------------------------------------------------------------------------------------------------------------------------------------------------------------|
| g | <b>Organisation</b><br><br>Local differences<br><br>Rural, regional vs. metropolitan | <p><i>'And I feel quite strongly that general practice, particularly in [a metro area], is in a really bad state in relation to the lack of collegial relationships that most GPs have. And I really sense that moving from [a regional area], you know I came from - I worked in two separate practices as a registrar, with huge, big tearooms. We'd all sit down for like a one-and-a-half-hour lunch, just chat, connect, all that stuff. And then, I came back to [a metro area], and started going to interviews, and I said to everybody, like, 'Where are your tearooms? Where do you guys have lunch?' And they said, 'Oh, I don't know. Well, we were going to put a tearoom in, but we decided that, you know, we couldn't really afford it. We just had to put another consulting room in'. Or others were like, 'Well, I think the doctors just eat at their own table.' And so, that I found really shocking. And I know that it's, it's just one thing. But I think that that really symbolizes just how much of a commodity that the general practitioner is seen as. You know, in most urban contexts... is you just come in, you sit at your table, you see the patients, and you go home. And I think that there's a huge cost to that. You know that you're, that you're not having those, you know, informal chats over morning or lunch.'</i></p> <p><i>(GP12)</i></p> |
| h | <b>System</b><br><br>Understanding                                                   | <p><i>'Maybe people who go into politics of general practice really have forgotten the basics. Yes, I think 'naïve' is the word. I don't think they have a great idea of the day to day.'</i> (GP10)</p>                                                                                                                                                                                                                                                                                                                                                                                                                                                                                                                                                                                                                                                                                                                                                                                                                                                                                                                                                                                                                                                                                                                                                                                     |
| i | <b>System</b><br><br>Audits & Liability<br><br>Complaint handling                    | <p><i>'This complaint, and all the other ones I've had, and other people I've seen... There should be some sort of triage system [within the HCCC, Health Care Complaints Commission] where the crap is weeded out, to reduce the stress on GPs, and other doctors, and save time. And at the same time not discouraging complainants, but perhaps it could be dealt with at a lower level.'</i> (GP20)</p>                                                                                                                                                                                                                                                                                                                                                                                                                                                                                                                                                                                                                                                                                                                                                                                                                                                                                                                                                                                  |
| j | <b>Finances</b><br><br>Organisation<br><br>Private billing                           | <p><i>So, [we are] private billing ... with discretion, so that there will be some patients that, you know, we'll bulk bill. But generally - And, I always have that mindset that I'm not going to undervalue myself. Otherwise, yeah, you know, yeah... And I think my patients have appreciated, that I do that extra bit for them and, you know, and they appreciate what they get. So, but I still will get occasional patients who will try [to get bulk billing].'</i> (GP15)</p>                                                                                                                                                                                                                                                                                                                                                                                                                                                                                                                                                                                                                                                                                                                                                                                                                                                                                                      |

|   |                                                                          |                                                                                                                                                                                                                                                                                                                                                                                                                                                                                                                                                                                                                                                                                                                                                                  |
|---|--------------------------------------------------------------------------|------------------------------------------------------------------------------------------------------------------------------------------------------------------------------------------------------------------------------------------------------------------------------------------------------------------------------------------------------------------------------------------------------------------------------------------------------------------------------------------------------------------------------------------------------------------------------------------------------------------------------------------------------------------------------------------------------------------------------------------------------------------|
| k | <b>Finances</b><br><br>Organisation<br><br>Bulk billing                  | <i>'One of the things I like about a bulk billing practice, and it's good, I think, for my wellbeing - I have worked at some practices that charge. I hated the stress at the end of every consult where someone would be saying, "Please, can you just bulk bill me"?' or "I just can't pay this week". And honestly, it was a very stressful situation at the end of every consult...' (GP2)</i>                                                                                                                                                                                                                                                                                                                                                               |
| l | <b>Finances</b><br><br>Organisation<br><br>Bulk billing                  | <i>'Ahm, I think GPs themselves hinder themselves. ... I think doctors' knowledge and understanding of Medicare, or GPs', is often appalling. ... They claim wrongly, they act poorly, they spend the public money poorly, and they're scared of things they shouldn't be scared of, or conversely, they're not scared of things they should be scared of. I think it's GPs themselves, not Medicare. ... It is ridiculous, because if you're a bulk billing GP your entire income is based on understanding that system, how can you possibly derive your income without understanding it? ... There is tons of information, Medicare videos, tutorials, loads of stuff on there, regular webinars. GPs do not educate themselves, it's their fault.'</i> (GP4) |
| m | <b>Finances</b><br><br>Personal<br><br>Maternity leave                   | <i>'And obviously, none of us get maternity leave from work. ... So financially, it's a huge source of stress, because - I'm lucky that my wife, who's also a doctor, works in the hospital system. She's put on and off about getting into general practice. Quite frankly, one of the things that puts her off is maternity leave and the thought of being completely unsupported by, you know, national government or any other organisation, if we were to take time off work.'</i> (GP1)                                                                                                                                                                                                                                                                    |
| n | <b>Finances</b><br><br>Personal<br><br>Control, flexibility              | <i>'And I think that in general practice we're lucky that we have somewhat well, we do have quite good control of our hours in that in that sense, particularly as a part time worker balancing a family at home.'</i> (GP19)                                                                                                                                                                                                                                                                                                                                                                                                                                                                                                                                    |
| o | <b>Overall</b><br><br>Balance<br><br>View on interventions for wellbeing | <i>'I mean [the term] 'work-life-balance' does me in. Because working 60 hours a week is fine for me. And being quiet drives me nuts. ...'</i><br><br><i>'...The college or the PHNs think they're fabulous when they put on a wellbeing weekend - and there's always a yoga class, you know, always a yoga class. I mean, what does that mean? That's a token, and the wellbeing industry is - the corporate life is all about talking about people's wellbeing, rather than providing real support.'</i>                                                                                                                                                                                                                                                       |

|  |  |                                                                                                                                              |
|--|--|----------------------------------------------------------------------------------------------------------------------------------------------|
|  |  | <i>Communication, engagement, concern, yeah, the same as we look after our patients.<br/>And we don't get looked after by anyone.' (GP9)</i> |
|--|--|----------------------------------------------------------------------------------------------------------------------------------------------|

**Table 2.** HCCC: Health Care Complaints Commission, Bulk billing: Medicare rebates cover practitioner charges (no out of pocket fees for patients). PHNs: Primary Care Networks.

For peer review only

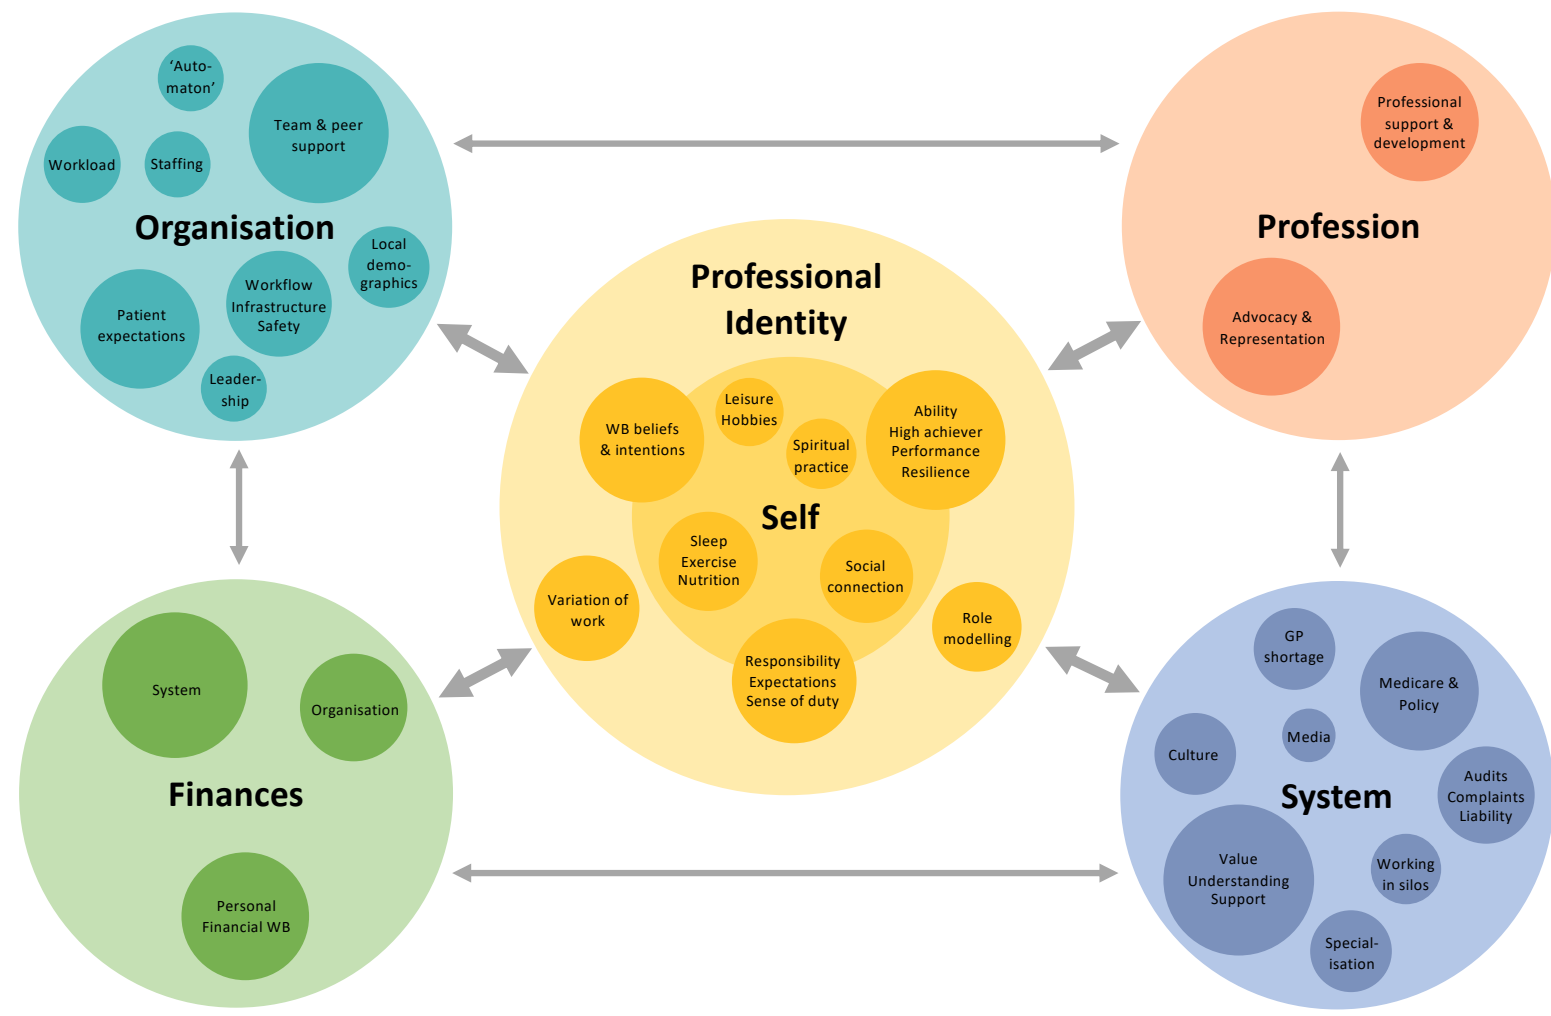

Fig. 1. Determinants of wellbeing in General Practitioners and their interaction. Bubble size reflects attributed importance of determinant.

©Diana Naehrig 2021.

1  
2  
3  
4  
5  
6  
7  
8  
9  
10  
11  
12  
13  
14  
15  
16  
17  
18  
19  
20  
21  
22  
23  
24  
25  
26  
27  
28  
29  
30  
31  
32  
33  
34  
35  
36  
37  
38  
39  
40  
41  
42  
43  
44  
45  
46

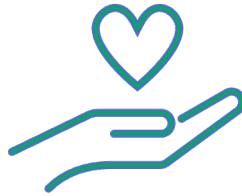

**Remuneration / rebate structure is a proxy for being valued (external driver)**

- ❖ Low remuneration, fees for item of service
- ❖ Exclusion from remuneration for 'specialist' services

This negatively impacts on GPs' perceived value, financial wellbeing and overall wellbeing.

**Fee structure drives patient behaviour (external driver)**

- ❖ Patients' unwillingness for co-payments
- ❖ Patients' expectations & regard for GPs providing free services

This negatively impacts on GPs' overall & financial wellbeing.

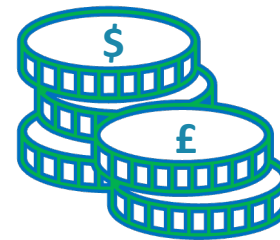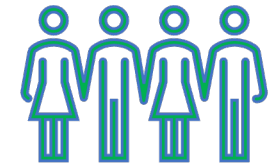

**Remuneration drives GP behaviour (internal driver)**

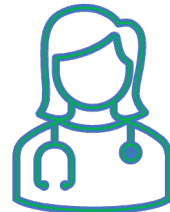

- ❖ High patient throughput
- ❖ Not taking breaks (working as an 'automaton')
- ❖ Working full-time (overall workload)

This creates stress over time, and negatively impacts on GPs' overall wellbeing.

Fig. 2. Mechanisms of the negative impact of finances on the wellbeing of General Practitioners.

©Diana Naehrig 2021 Infographic. PowerPoint Stock Images.

### Supplement 1. Qualitative Interview Guide “Wellbeing of General Practitioners”

Introduction script:

- Hello, and thank you for your willingness to participate in this interview about GP wellbeing.
- This interview will take approximately 30 minutes.
- With your consent, a recording of this interview will be made for transcription and analysis. The video component of the recording is not necessary for transcription or analysis and can be turned off if you prefer. If you do decide to turn the camera off, you will still be able to participate in the interview. **\*\*indicate the video button on the bottom toolbar\*\*** Is that okay? Please note that I will ask you again once the recording starts to confirm that you have consented to recording.
- Then I will start the recording NOW.
- Can I confirm that you have consented to video / audio recording this interview?
- Have you read the Participant Information Statement?
- Do you have any further questions?
- Do you consent to take part in this research project?
- Great thank you. Let’s start.

| Question                                                                                                                                                                                | Prompt                                                                                                                                                                                                                                                                                                                                                                                                          | Rationale                                                                                                                            |
|-----------------------------------------------------------------------------------------------------------------------------------------------------------------------------------------|-----------------------------------------------------------------------------------------------------------------------------------------------------------------------------------------------------------------------------------------------------------------------------------------------------------------------------------------------------------------------------------------------------------------|--------------------------------------------------------------------------------------------------------------------------------------|
| 1. I’ll just start by asking some general information about yourself:<br>a. Where do you work?<br>b. How many years have you worked as a GP?<br>c. Are you employed, contractor, owner? | <ul style="list-style-type: none"> <li>• Where is the GP practice located (metro, rural, remote)?</li> <li>• Have you worked in any other type of practice or location?</li> <li>• Have you specialised or received training in any specific additional areas?</li> </ul>                                                                                                                                       | Understand the different demographic groups of Australian GPs that have volunteered to participate in this study.                    |
| 2. How would you define wellbeing?                                                                                                                                                      | <ul style="list-style-type: none"> <li>• What does the concept ‘wellbeing’ mean to you?</li> <li>• Does wellbeing mean the same thing when you think of your own personal wellbeing compared to the wellbeing of your patients? Do you use the same ‘yardstick’?</li> </ul>                                                                                                                                     | Introduction. Lead into their understanding of the subject of wellbeing.<br><br>Explore their personal meaning of wellbeing.         |
| 3. What promotes wellbeing for you on a personal level?                                                                                                                                 | <ul style="list-style-type: none"> <li>• What do you generally do to keep yourself well?</li> <li>• Are there any resources, people, strategies you use to help maintain your wellbeing?</li> <li>• How important is improving your own wellbeing to you? Why is this so?</li> <li>• Are there any differences in how you maintain your own wellbeing at work, compared to when you are not at work?</li> </ul> | Explore how they stay well, what factors are involved to gain and maintain personal wellbeing.<br><br>How important is this to them. |

|                                                                                                                    |                                                                                                                                                                                                                                                                                                                                                                                                                                                                                  |                                                                                                         |
|--------------------------------------------------------------------------------------------------------------------|----------------------------------------------------------------------------------------------------------------------------------------------------------------------------------------------------------------------------------------------------------------------------------------------------------------------------------------------------------------------------------------------------------------------------------------------------------------------------------|---------------------------------------------------------------------------------------------------------|
| <p>4. What promotes your wellbeing on an organisational (GP practice) level?</p>                                   | <ul style="list-style-type: none"> <li>• How does the environment at work support your wellbeing?</li> <li>• Is there anything in your work environment that hinders or does not support your wellbeing? [If yes] What is that?</li> <li>• What needs to change?</li> <li>• What would need to happen in your immediate work surroundings for your wellbeing to be optimally supported?</li> </ul>                                                                               | <p>Explore what organisational factors need to be in place to gain and maintain personal wellbeing.</p> |
| <p>5. What promotes your wellbeing on a health systems level?</p>                                                  | <ul style="list-style-type: none"> <li>• Looking at the situation from a systemic perspective, what keeps you well?</li> <li>• If you could wave a magic wand, what would need to be in place (ie. how would you change the system for GPs)?</li> <li>• What support could policy makers, RACGP college, PHNs, Medicare, health insurances, etc) provide?</li> </ul>                                                                                                             | <p>Explore what systemic factors need to be in place to gain and maintain personal wellbeing.</p>       |
| <p>6. What is the impact of overall culture in health care on wellbeing?</p>                                       | <ul style="list-style-type: none"> <li>• How does the culture in health care influence the wellbeing of GPs?</li> <li>• How would you change the culture in health care to promote the wellbeing of GPs more generally?</li> </ul>                                                                                                                                                                                                                                               | <p>Explore cultural aspects to wellbeing.</p>                                                           |
| <p>7. Where do you access information and support to assist with your wellbeing?</p>                               | <ul style="list-style-type: none"> <li>• Do you access any information or services to assist in your wellbeing?</li> <li>• If yes, how useful is this?</li> <li>• If no, what would this information or service need to look like to be useful to you?</li> <li>• What sort of interventions (or support) do you think could be implemented to improve GPs wellbeing?             <ul style="list-style-type: none"> <li>○ How should these be delivered?</li> </ul> </li> </ul> | <p>Continuing personal and professional development.</p>                                                |
| <p>8. Is there anything else about wellbeing for GPs or your personal experience that you would like to share?</p> | <ul style="list-style-type: none"> <li>• How has COVID-19 impacted GP wellbeing?</li> <li>• Has COVID-19 influenced any support/interventions focused on GP wellbeing being provided?</li> </ul>                                                                                                                                                                                                                                                                                 | <p>Final question</p>                                                                                   |



## Supplement 2. Medicare terms explained.

All definitions are direct verbatim quotes from the sources in parenthesis. Accessed online on 16/09/2021.

### Medicare

'Medicare is Australia's universal health insurance scheme. It guarantees all Australians (and some overseas visitors) access to a wide range of health and hospital services at low or no cost.' (Australian Government, Department of Health, <https://www.health.gov.au/health-topics/medicare>)

'Medicare was introduced by the Commonwealth Government in 1984 to provide eligible Australian residents with affordable, accessible and high-quality healthcare. Medicare is based on the understanding that all Australians should contribute to the cost of healthcare according to their ability to pay. It is financed through progressive income taxation and an income-related Medicare levy.' (State Government Victoria, Department of Health, <https://www.racgp.org.au/download/Documents/e-health/Summary-of-new-MBS-item-numbers.pdf>)

### Medicare rebates and item numbers

'The Medicare Benefits Schedule (the MBS) is a list of the medical services for which the Australian Government will pay a Medicare rebate, to provide patients with financial assistance towards the costs of their medical services. Medicare rebates do not, and were never intended to, cover the full cost of medical services. The Government sets a Medicare Schedule Fee to determine the amount of the rebate that patients receive from the Government.' (Australian Medical Association, <https://www.ama.com.au/sites/default/files/documents/Guide%20for%20Patients%20on%20How%20the%20Health%20Care%20System%20Funds%20Medical%20Care.pdf>)

### Bulk billing

'Bulk billing means you don't have to pay for your medical service from a health professional. They [health professionals] bill us [Medicare] instead and they accept the Medicare benefit as full payment for the service. ... Not all health professionals bulk bill.' (Australian Government, Services Australia, <https://www.servicesaustralia.gov.au/individuals/subjects/how-claim-medicare-benefit/bulk-billing>)

## COREQ 32-item checklist

Authors: 1. D. Naehrig, 2. N. Glozier, 3. C. Klinner, 4. L. Acland, 5. B. Goodger, 6. I. Hickie, 7. A. Milton

| Number | Item                                       | Description                                                                                                                                                                                                                                                                                                                                                                                                                                                                                                                                                                                                                                                                               | Page No.                |
|--------|--------------------------------------------|-------------------------------------------------------------------------------------------------------------------------------------------------------------------------------------------------------------------------------------------------------------------------------------------------------------------------------------------------------------------------------------------------------------------------------------------------------------------------------------------------------------------------------------------------------------------------------------------------------------------------------------------------------------------------------------------|-------------------------|
| 1.     | Interviewer                                | Author 1 conducted all interviews.                                                                                                                                                                                                                                                                                                                                                                                                                                                                                                                                                                                                                                                        | Title page, and page 5  |
| 2.     | Researcher credentials                     | Author 1: Dr.med., FMH Radioonkologie, MSc Coach Psych.<br>Author 2: Prof of Psychological Medicine.<br>Author 3: Grad Cert QHR (Qualitative Health Research)<br>Author 4: BA BMed MHM MPH FRACGP.<br>Author 5: Dr<br>Author 6: AM MD FRANZCP FASSA FAHM<br>Author 7: BSc, MAppSc, PhD                                                                                                                                                                                                                                                                                                                                                                                                    | Title page.             |
| 3.     | Occupation                                 | Author 1 is a PhD candidate in psychological medicine, with experience in mixed methods research, as a clinician-researcher, coaching psychology, and as medical communication skills facilitator. Author 3 is a research assistant and experienced qualitative researcher. Author 4 is a general practitioner and head of clinical governance. Author 5 is a general practitioner. Authors 2 and 6 are psychiatrists both with extensive expertise in mixed methods research. Author 7 is a post-doctoral researcher in psychology, with extensive experience in qualitative research design, conduct and analysis.                                                                      | Title page, and page 5. |
| 4.     | Gender                                     | Authors 1, 3, 4 and 7 are female. Authors 2, 5 and 6 are male.                                                                                                                                                                                                                                                                                                                                                                                                                                                                                                                                                                                                                            | Page 5                  |
| 5.     | Experience and training                    | Authors are experienced and active researchers with expertise in qualitative, quantitative, and mixed methods approaches. Authors have researched and published in the broad topic area previously.                                                                                                                                                                                                                                                                                                                                                                                                                                                                                       | Page 5                  |
| 6.     | Relationship established                   | Participants only had direct contact with author 1. GPs interested in participating in the research contacted author 1 via phone, text, or email. Prior to interviews, the participants had the opportunity to review the participant information and consent forms, and discuss any questions, before giving consent. After the interview there was one brief follow-up and thank you email sent out. Author 1's interest in, and perceived importance of the topic of GP wellbeing may have assisted in establishing a relationship built on trust and mutual understanding. Similarly, GPs who are particularly interested in the subject of wellbeing may have chosen to participate. | Page 5                  |
| 7.     | Participants' knowledge of the interviewer | Author 1 who conducted all interviews had no previous professional or personal relationship with any of the participants. Co-authors only reviewed de-identified transcripts thus had no personal relationship with, or knowledge of participants. Participants were informed about who the involved researchers are in the Participant Information Statement (PIS).                                                                                                                                                                                                                                                                                                                      | Page 5                  |
| 8.     | Interviewer characteristics                | The interviewer is a PhD candidate, with a background in medicine and psychology. Author 1 chose to pursue the topic of GP wellbeing, because of perceived importance of the subject matter, and a personal belief that this is crucial in providing sustainable primary care to the population. As such she is aware of potential bias particularly in favour of GPs and their experience.                                                                                                                                                                                                                                                                                               | Page 5                  |
| 9.     | Methodological orientation and theory      | Thematic framework analysis with an inductive, data-driven approach was taken.                                                                                                                                                                                                                                                                                                                                                                                                                                                                                                                                                                                                            | Page 4                  |
| 10.    | Sampling                                   | Maximum variation sampling was applied, as we aimed for a diverse mix of participants across Australia.                                                                                                                                                                                                                                                                                                                                                                                                                                                                                                                                                                                   | Page 5                  |

|     |                                |                                                                                                                                                                                                                                                                                                 |                           |
|-----|--------------------------------|-------------------------------------------------------------------------------------------------------------------------------------------------------------------------------------------------------------------------------------------------------------------------------------------------|---------------------------|
| 11. | Method of approach             | We were supported by several organisations, who sent e-newsletters and communications to their members. Flyers, social media, and snowballing were also utilised.                                                                                                                               | Page 5                    |
| 12. | Sample size                    | N=20                                                                                                                                                                                                                                                                                            | Page 7                    |
| 13. | Non-participation              | Three GPs that were initially interested, subsequently did not partake in the interview. One stated lack of time, the others simply didn't respond to follow-up emails. All interviews that were commenced, were also completed.                                                                | NA                        |
| 14. | Setting of data collection     | Interviews were conducted online one-on-one via a University of Sydney password-protected Zoom meeting room.                                                                                                                                                                                    | Page 5                    |
| 15. | Presence of non-participants   | NA                                                                                                                                                                                                                                                                                              | NA                        |
| 16. | Description of sample          | A diverse group of GPs working clinically in Australia.                                                                                                                                                                                                                                         | Page 5                    |
| 17. | Interview guide                | Interviews were semi-structured, and included questions about GPs' own wellbeing.                                                                                                                                                                                                               | Page 6                    |
| 18. | Repeat interviews              | NA                                                                                                                                                                                                                                                                                              | NA                        |
| 19. | Audio/visual recording         | Interviews were recorded via Zoom, either on audio, or audio and video setting, as per the preference of the GP. Only audio-recordings were saved.                                                                                                                                              | Page 6                    |
| 20. | Field notes                    | Notes were made for analysis and were updated during researcher discussions to inform the writing of the manuscript.                                                                                                                                                                            | N/A                       |
| 21. | Duration                       | Interviews ranged from 20 to 43 minutes (mean 32 minutes duration).                                                                                                                                                                                                                             | Page 7                    |
| 22. | Data saturation                | Interviews were continued until data saturation was achieved. Data saturation was discussed and agreed upon in a team of 2 researchers (author 1 and 3), in consultation with author 7.                                                                                                         | Page 6                    |
| 23. | Transcripts returned           | Transcripts were not returned to participants.                                                                                                                                                                                                                                                  | N/A                       |
| 24. | Number of data coders          | Data was coded by authors 1 and 3.                                                                                                                                                                                                                                                              | Page 6                    |
| 25. | Description of the coding tree | Codes, themes, and subthemes were iteratively refined and developed during regular research team meetings between authors 1 and 3, and were triangulated with authors 2 and 7. Descriptions of the themes, subthemes and codes were developed and captured in a codebook (or coding framework). | Page 6                    |
| 26. | Derivation of themes           | Themes and subthemes were derived from the data.                                                                                                                                                                                                                                                | Page 6, 7                 |
| 27. | Software                       | Microsoft Word and NVivo 12.1.0 were used to manage the data.                                                                                                                                                                                                                                   | Page 6                    |
| 28. | Participant checking           | Participant checking was not applied.                                                                                                                                                                                                                                                           | NA                        |
| 29. | Quotations presented           | Participant quotations were used to exemplify (or illustrate) the finding. Quotations are identified with GP participant numbers, only to maintain anonymity.                                                                                                                                   | Pages 7-14, Table 2.      |
| 30. | Data and findings consistent   | Data and findings are consistent throughout.                                                                                                                                                                                                                                                    | Page 7-19                 |
| 31. | Clarity of major themes        | Themes are clearly described and presented in the manuscript and figure 1.                                                                                                                                                                                                                      | Pages 7,8, and figure 1.  |
| 32. | Clarity of minor themes        | Subthemes are clarified in detail, and their interconnectedness described.                                                                                                                                                                                                                      | Pages 7-14, and figure 1. |

1  
2  
3  
4  
5  
6  
7  
8  
9  
10  
11  
12  
13  
14  
15  
16  
17  
18  
19  
20  
21  
22  
23  
24  
25  
26  
27  
28  
29  
30  
31  
32  
33  
34  
35  
36  
37  
38  
39  
40  
41  
42  
43  
44  
45  
46  
47  
48  
49  
50  
51  
52  
53  
54  
55  
56  
57  
58  
59  
60

For peer review only

# BMJ Open

## Walking a tight rope. Determinants of GP wellbeing—a qualitative study

|                                 |                                                                                                                                                                                                                                                                                                                                                                                                                                                                                                                                                                                                                                                          |
|---------------------------------|----------------------------------------------------------------------------------------------------------------------------------------------------------------------------------------------------------------------------------------------------------------------------------------------------------------------------------------------------------------------------------------------------------------------------------------------------------------------------------------------------------------------------------------------------------------------------------------------------------------------------------------------------------|
| Journal:                        | <i>BMJ Open</i>                                                                                                                                                                                                                                                                                                                                                                                                                                                                                                                                                                                                                                          |
| Manuscript ID                   | bmjopen-2021-058616.R1                                                                                                                                                                                                                                                                                                                                                                                                                                                                                                                                                                                                                                   |
| Article Type:                   | Original research                                                                                                                                                                                                                                                                                                                                                                                                                                                                                                                                                                                                                                        |
| Date Submitted by the Author:   | 06-Jan-2022                                                                                                                                                                                                                                                                                                                                                                                                                                                                                                                                                                                                                                              |
| Complete List of Authors:       | Naehrig, Diana; The University of Sydney Faculty of Medicine and Health, Central Clinical School; The University of Sydney Faculty of Medicine and Health, Brain and Mind Centre<br>Glozier, Nick; The University of Sydney Faculty of Medicine and Health, Central Clinical School<br>Klinner, Christiane; The University of Sydney Faculty of Medicine and Health<br>Acland, Louise; ForHealth<br>Goodger, Brendan; Central and Eastern Sydney PHN<br>Hickie, Ian; The University of Sydney Faculty of Medicine and Health, Brain and Mind Centre<br>Milton, Alyssa ; The University of Sydney Faculty of Medicine and Health, Central Clinical School |
| <b>Primary Subject Heading</b>: | General practice / Family practice                                                                                                                                                                                                                                                                                                                                                                                                                                                                                                                                                                                                                       |
| Secondary Subject Heading:      | General practice / Family practice                                                                                                                                                                                                                                                                                                                                                                                                                                                                                                                                                                                                                       |
| Keywords:                       | GENERAL MEDICINE (see Internal Medicine), MENTAL HEALTH, OCCUPATIONAL & INDUSTRIAL MEDICINE, PRIMARY CARE, PUBLIC HEALTH                                                                                                                                                                                                                                                                                                                                                                                                                                                                                                                                 |
|                                 |                                                                                                                                                                                                                                                                                                                                                                                                                                                                                                                                                                                                                                                          |

SCHOLARONE™  
Manuscripts



I, the Submitting Author has the right to grant and does grant on behalf of all authors of the Work (as defined in the below author licence), an exclusive licence and/or a non-exclusive licence for contributions from authors who are: i) UK Crown employees; ii) where BMJ has agreed a CC-BY licence shall apply, and/or iii) in accordance with the terms applicable for US Federal Government officers or employees acting as part of their official duties; on a worldwide, perpetual, irrevocable, royalty-free basis to BMJ Publishing Group Ltd ("BMJ") its licensees and where the relevant Journal is co-owned by BMJ to the co-owners of the Journal, to publish the Work in this journal and any other BMJ products and to exploit all rights, as set out in our [licence](#).

The Submitting Author accepts and understands that any supply made under these terms is made by BMJ to the Submitting Author unless you are acting as an employee on behalf of your employer or a postgraduate student of an affiliated institution which is paying any applicable article publishing charge ("APC") for Open Access articles. Where the Submitting Author wishes to make the Work available on an Open Access basis (and intends to pay the relevant APC), the terms of reuse of such Open Access shall be governed by a Creative Commons licence – details of these licences and which [Creative Commons](#) licence will apply to this Work are set out in our licence referred to above.

Other than as permitted in any relevant BMJ Author's Self Archiving Policies, I confirm this Work has not been accepted for publication elsewhere, is not being considered for publication elsewhere and does not duplicate material already published. I confirm all authors consent to publication of this Work and authorise the granting of this licence.

## TITLE PAGE

|                       |                                                                                                                                                                                                                                                                                                                                                                                                                                                                                                                                                                                                                                                                                                                                                                                                                                                                                                                                                                                                                                                                                                                                                                                                                                                                                                                                                                                                                                                                                                                                                                                                                                                                                                                                                                                                                                                                                                                                                                                                                                                                                                                                                                                                                                                                                              |
|-----------------------|----------------------------------------------------------------------------------------------------------------------------------------------------------------------------------------------------------------------------------------------------------------------------------------------------------------------------------------------------------------------------------------------------------------------------------------------------------------------------------------------------------------------------------------------------------------------------------------------------------------------------------------------------------------------------------------------------------------------------------------------------------------------------------------------------------------------------------------------------------------------------------------------------------------------------------------------------------------------------------------------------------------------------------------------------------------------------------------------------------------------------------------------------------------------------------------------------------------------------------------------------------------------------------------------------------------------------------------------------------------------------------------------------------------------------------------------------------------------------------------------------------------------------------------------------------------------------------------------------------------------------------------------------------------------------------------------------------------------------------------------------------------------------------------------------------------------------------------------------------------------------------------------------------------------------------------------------------------------------------------------------------------------------------------------------------------------------------------------------------------------------------------------------------------------------------------------------------------------------------------------------------------------------------------------|
| Title                 | <b>Walking a tight rope. Determinants of GP wellbeing—a qualitative study</b>                                                                                                                                                                                                                                                                                                                                                                                                                                                                                                                                                                                                                                                                                                                                                                                                                                                                                                                                                                                                                                                                                                                                                                                                                                                                                                                                                                                                                                                                                                                                                                                                                                                                                                                                                                                                                                                                                                                                                                                                                                                                                                                                                                                                                |
| Authors               | <p>Diana Naehrig, ORCID (0000-0002-1162-4092), Dr.med., FMH Radioonkologie, MSc Coach Psych, PhD candidate, The University of Sydney, Faculty of Medicine and Health, Level 5, Professor Marie Bashir Centre, Missenden Road, Camperdown, NSW 2050, Australia, <a href="mailto:dnae2050@uni.sydney.edu.au">dnae2050@uni.sydney.edu.au</a>;</p> <p>Nick Glozier, ORCID (0000-0002-0476-9146), Professor of Psychological Medicine, The University of Sydney, Faculty of Medicine and Health, Central Clinical School, Level 5, Professor Marie Bashir Centre, Missenden Road, Camperdown, NSW 2050, Australia, <a href="mailto:nick.glozier@sydney.edu.au">nick.glozier@sydney.edu.au</a></p> <p>Christiane Klinner, ORCID (0000-0001-9313-6799), Qualitative researcher, The University of Sydney, Faculty of Medicine and Health, Level 5, Professor Marie Bashir Centre, Missenden Road, Camperdown, NSW 2050, Australia, <a href="mailto:Christiane.Klinner@sydney.edu.au">Christiane.Klinner@sydney.edu.au</a>;</p> <p>Louise Acland, ORCID (0000-0003-0417-6989), BA BMed MHM MPH FRACGP, General Practitioner, ForHealth, 316 Charlestown Rd, Charlestown and Chair, RACGP Committee Standards for general practice <a href="mailto:louiseacland@gmail.com">louiseacland@gmail.com</a></p> <p>Brendan Goodger, Dr, General Manager Primary Care Improvement, Central and Eastern Sydney PHN, Tower A, Level 5, 201 Coward St, Mascot NSW 2020, Australia, <a href="mailto:b.goodger@cesphn.com.au">b.goodger@cesphn.com.au</a>;</p> <p>Ian Hickie, ORCID (0000-0001-8832-9895), AM MD FRANZCP FASSA FAHM<br/>Co-Director, Health and Policy and Professor of Psychiatry, NHMRC Senior Principal Research Fellow, The University of Sydney, Faculty of Medicine and Health, Brain and Mind Centre, Level 4, Building F, 94 Mallett Street, Camperdown, NSW 2050, Australia, <a href="mailto:ian.hickie@sydney.edu.au">ian.hickie@sydney.edu.au</a>;</p> <p>Alyssa Milton, ORCID (0000-0002-4326-0123), BSc, MAppSc, PhD Post-doctorate researcher, The University of Sydney, Faculty of Medicine and Health, Level 5, Professor Marie Bashir Centre, Missenden Road, Camperdown, NSW 2050, Australia, <a href="mailto:Alyssa.Milton@sydney.edu.au">Alyssa.Milton@sydney.edu.au</a>;</p> |
| Corresponding author  | Diana Naehrig, The University of Sydney, Faculty of Medicine and Health, Level 5, Professor Marie Bashir Centre, Missenden Road, Camperdown, NSW 2050, Australia, <a href="mailto:dnae2050@uni.sydney.edu.au">dnae2050@uni.sydney.edu.au</a>                                                                                                                                                                                                                                                                                                                                                                                                                                                                                                                                                                                                                                                                                                                                                                                                                                                                                                                                                                                                                                                                                                                                                                                                                                                                                                                                                                                                                                                                                                                                                                                                                                                                                                                                                                                                                                                                                                                                                                                                                                                 |
| Word count manuscript | 4322/4000                                                                                                                                                                                                                                                                                                                                                                                                                                                                                                                                                                                                                                                                                                                                                                                                                                                                                                                                                                                                                                                                                                                                                                                                                                                                                                                                                                                                                                                                                                                                                                                                                                                                                                                                                                                                                                                                                                                                                                                                                                                                                                                                                                                                                                                                                    |

## ABSTRACT

### Objectives

The wellbeing of doctors is recognised as a major priority in health care, yet there is little research on how General Practitioners (GPs) keep well as opposed to mitigating burnout and mental ill health. We aimed to address this gap, apply a positive lens, and explore what determines GPs wellbeing in Australia. This is of particular importance considering the increasing demand for primary healthcare services.

### Design

Semi-structured qualitative interviews.

From March to September 2021, we interviewed GPs working in numerous settings, using snowball and purposive sampling to expand recruitment across Australia. 20 GPs participated individually via Zoom. A semi-structured interview-guide provided a framework to explore wellbeing from a personal, organisational, and systemic perspective. Recordings were transcribed verbatim, and inductive thematic analysis was performed.

### Results

Eleven female and nine male GPs with diverse experience, from urban and rural settings were interviewed (mean 32 minutes). Determinants of wellbeing were underpinned by GPs' sense of identity. This was strongly influenced by GPs seeing themselves as a distinct but often undervalued profession working in small organisations within a broader health system. Both personal finances, and funding structures emerged as important moderators of the inter-connections between these themes. A complex balancing act between all determinants of wellbeing was evidenced.

### Conclusions

Understanding determinants of wellbeing and their complex inter-connections can inform future strategies, and interventions. Finances need to be a major consideration to prioritise, promote, and support GP wellbeing, and a sustainable primary care workforce.

### Keywords

Wellbeing, determinants, general practitioner, family practitioner, primary health care, qualitative research.

#### *Ethics approval statement*

This study was approved by the University of Sydney Human Research and Ethics Committee (2020/822).

#### *Funding source*

Dr Diana Naehrig is funded through the Raymond Seidler PhD scholarship.

This research was supported (partially or fully) by the Australian Government through the Australian Research Council's Centre of Excellence for Children and Families over the Life Course (Project ID CE200100025).



The funding sources did not have any influence on the design or conduct of this research.

## STRENGTHS AND LIMITATIONS OF THIS STUDY

### Strengths

- A positive framework was deliberately selected to examine GPs' wellbeing, which complements literature on mitigating burnout.
- Qualitative inquiry assists in understanding complex interactions between different determinants of wellbeing.
- Our diverse sample includes GPs working in a wide range of clinical settings in Australia.

### Limitations

- Our results may not be generalisable to all GPs, particularly those working outside of the Australian context.
- Selection bias needs to be considered in any voluntary research participation.

## INTRODUCTION

Wellbeing of health care professionals has been recognised as a priority, and key component of the wider goals for health care in the USA, and Canada (1-4). General practice crucially provides cost-effective care to an aging population with chronic and complex health needs, and demand for generalist services outweighs supply in many countries, particularly in the UK, and USA (5-8).

In Australia, the 'National medical workforce strategy' aims to develop and coordinate a joint vision to provide effective, universally accessible, and sustainable health care across the entire population (9). Doctor wellbeing, and insufficient generalist capacity, have been identified as top concerns that need to be addressed besides maldistribution, and imbalance of specialities within the medical workforce (9, 10). Despite growing numbers of GPs nationally (11, 12), and GPs per capita (12), the availability of GPs in Australian major cities outstrips that of non-metropolitan areas (11). Together with a longstanding dearth of GPs in rural and remote areas (11, 13), this leaves parts of the population chronically underserved. Global factors including an aging GP workforce, impending retirements, a shift towards more women entering GP training, with a trend towards reduced work hours also affect Australia (14-16), and will likely further contribute to an imbalance in generalist capacity versus

1  
2  
3 service demand. A decline in Royal Australian College of General Practice (RACGP)  
4 applications and filled training places (14), and a waning interest in general practice from  
5 surveyed medical students (17), may well exacerbate the issue. Concerningly, a recent  
6 Australian report forecasts a 37% increased demand in GP services, with a likely undersupply  
7 of 9,298 full time equivalent GPs by 2030, particularly for urban areas (18).

8  
9  
10  
11 The additional strain of the current pandemic (19) highlights the need for a thriving GP  
12 workforce, and GPs' wellbeing is more important than ever. Professional organisations are  
13 aware of this and are endeavouring to address wellbeing by offering support (i.e., RACGP  
14 programmes and resources (20, 21)), and funding research into GP wellbeing.

15  
16  
17  
18  
19  
20  
21 Doctors' health research is typically informed by the clinical model, and there is a substantial  
22 body of literature aiming to explore and mitigate burnout, distress, and mental ill health (22-  
23 29), and improve doctors' uptake of health services across different settings (30-34). There is  
24 comparatively little research—particularly qualitative—that deliberately applies a positive  
25 lens, and explores how GPs keep well and thrive. Of note, research groups in the UK focused  
26 on psychological wellbeing in GPs (35, 36) whereby one publication was a survey, the other  
27 a systematic review; another group explored GP wellbeing as distinct from burnout (37, 38),  
28 publishing a qualitative exploration and survey results. We aimed to add to this burgeoning  
29 approach, and explore GPs wellbeing in the Australian context.

30  
31  
32  
33  
34  
35  
36 Overall, there is remarkably little evidence on how to effectively increase GP wellbeing (39).  
37 Our recent systematic review of both trials and policy changes showed interventions are  
38 typically aimed at the individual GP, involve mindfulness practice, and show low to moderate  
39 effectiveness. Very few interventions target organisations, or health systems (39).

## 40 41 42 43 44 **OBJECTIVES**

45  
46 A robust and sustainable generalist workforce is important. In order to bolster the wellbeing  
47 of Australian GPs, and ultimately address the gap in the literature regarding effective  
48 wellbeing interventions for GPs as seen through a positive lens, we aimed to:

- 49  
50  
51  
52  
53  
54  
55  
56  
57  
58  
59  
60
- apply a positive framework to explore GPs' wellbeing, and key, potentially modifiable, factors that determine it.
  - qualitatively analyse how these determinants are inter-connected, and what the underlying drivers are.

## **METHODS**

### *Qualitative approach and research design*

We applied a six-step qualitative thematic analysis (40-43), providing a flexible and accessible way of analysing qualitative data, enabling iterative exploration of patterns and relationships between different themes whilst ensuring research rigour.

The six steps included: 1) familiarising with data; 2) generating initial codes; 3) searching for themes and subthemes; 4) reviewing themes; 5) refining, defining and naming themes; and 6) writing the report (43).

We used an inductive data-driven (bottom-up), and a critical realist epistemological approach to our analysis (44). A COREQ (45) reporting checklist is provided.

### *Researcher characteristics and reflexivity*

Our research team (four females and three males) consisted of a PhD candidate with background in medicine and coaching psychology (DN); two GPs, one (BG) a representative of a Primary Health Network (PHN), a GP led organisation responsible for the primary care of a large geographical location typically serving a few hundred thousand people, and a representative (LA) of a national private GP organisation; two psychiatrists (NG, IH); a psychologist/researcher (AM), and a researcher (CK) both with extensive qualitative expertise. Collaborating with GPs within our research team enabled reflexivity across personal, professional, organisational and systemic experiences (46).

### *Context & sampling strategy*

Recruitment was aimed at GPs, and GP registrars working clinically in Australia. We chose a maximum variation sampling approach (47, 48), and purposely engaged PHNs and a private GP organisation to announce our study in e-newsletters and communications. Furthermore, we utilised flyers, social media, and snowballing.

### *Patient and Public involvement*

Patients and public were not involved in the design or conduct of this research project.

### *Ethical issues*

Participation was voluntary. All participants received a participant information sheet and provided consent prior to being interviewed. The University of Sydney HREC approved this study (2020/822).

### *Data collection & management*

DN interviewed GPs one-on-one online in password protected Zoom conferencing rooms. A semi-structured topic guide (Supplement 1)—developed by the entire team—provided a framework, whilst allowing for further explorative questions. Interview topics included demographic information about participants, GPs' conceptualisation of wellbeing, factors promoting their wellbeing on a personal, organisational and systems level, the impact of culture in health care on wellbeing, accessing information and support to assist with their wellbeing, and the impacts of COVID-19 on their wellbeing. We planned 20 interviews with the potential for further interviews. After independent analysis of half the transcripts (DN, CK) no new codes or themes were identified (49). Interviews were continued to capture GPs from various geographical locations and experience levels. No additional themes emerged, meeting the criteria for thematic data saturation (50). We concluded at 20 participants as intended.

Interviews were audio-recorded, and securely managed on University of Sydney research servers. Verbatim transcripts were checked for accuracy against original recordings and de-identified by DN before analysis.

### *Data analysis*

Inductive thematic analysis (43) was facilitated by Nvivo12 software (51). DN, CK, AM, NG engaged in steps 1) to 3) as described above, based on three different, randomly selected transcripts that were allocated to each researcher. DN developed a preliminary codebook in consultation with the research team with themes and subthemes (step 4), and coded all transcripts using NVivo (51). CK independently reviewed all transcripts and double coded half of them. Inter-coder variability (52) ranged from  $k = 0.48$  to  $k = 0.99$  depending on the theme, providing the basis for further dialogue, reflexivity, and theme development (step 4 and 5). The codebook was iteratively refined throughout the process (DN, CK), and by triangulation with AM and NG (step 5); detailed descriptions of all codes were developed. For step 6, reporting of results, see below.

## **RESULTS**

From March to September 2021, we interviewed 20 GPs (mean duration of 32 minutes; range 20 - 43 minutes) with diverse experience levels, backgrounds, geographical, and work arrangements (Table 1).

1  
2  
3 The interviews captured participants' conceptualisation of wellbeing; determinants of  
4 wellbeing; and strategies for wellbeing. Running through each was a current focus on  
5 COVID-19 influences and impacts on GPs' wellbeing.  
6  
7

8 Here, we report on determinants of wellbeing that emerged in the interviews. For  
9  
10 determinants we discerned five themes, each with several subthemes. We charted these  
11 (Figure 1), and important interconnections were analysed.  
12

13 Strategies for wellbeing, and the COVID-19 specific influences on GP wellbeing are  
14 presented elsewhere.  
15  
16

### 17 18 *Identity / Self*

19  
20 Determinants of wellbeing were related to GPs' identity as a person, and their identity as a  
21 professional with many seeing themselves as 'wellbeing experts' especially for physical and  
22 mental aspects of wellbeing (Table 2a). Personal determinants included exercise, sleep,  
23 nutrition, social and community connection, leisure activities, spiritual practice, and a 'sense  
24 of balance' overall (Table 2b) determined by participants beliefs, intentions, and behaviours.  
25 However, several participants stated not (always) heeding the wellbeing advice they gave  
26 their patients.  
27  
28  
29  
30  
31

32  
33 *'...I've come to realise, actually, that what I'm imparting is good advice, but I need to*  
34 *follow it myself as well, because it does make sense, and it does improve my wellbeing*  
35 *as well. So, yeah, I think as GPs, I'm not sure we always do what's right for ourselves,*  
36 *you know, compared to what we impart to our patients.'* (GP15)  
37  
38  
39

40  
41 A strong professional identity—defined by a sense of duty, responsibility, and high self-  
42 expectations —was ubiquitous (Table 2c). GPs also saw themselves as high achieving, able  
43 and resilient (Table 2d).  
44  
45

46  
47 *'From an identity point of view, ... being a doctor sometimes subsumes my identity,*  
48 *and it's an important part of my identity. And therefore, my contentment at work and*  
49 *my recognition as a doctor, and the satisfaction I get at work impact on my identity as*  
50 *a doctor...'* (GP14)  
51  
52  
53

54  
55 Choosing variation in the type of work carried out was another determinant of keeping well,  
56 both through avoiding monotony and isolation, and by temporarily relinquishing the burden  
57 of patient responsibility (i.e., having academic days, pursuing teaching and management, or  
58 assisting surgeons in theatre) (Table 2e).  
59  
60

1  
2  
3  
4  
5 Determinants of professional wellbeing were offset by a sense of being perceived as ‘less  
6 than’ a specialist by the system, the public, other doctors and often internalised by the GPs  
7 (Table 2f).  
8  
9

### 10 11 12 *Organisation*

13 For the organisational (practice) theme, the most important factor determining personal  
14 wellbeing was team and peer support. This included mostly informal debriefs with colleagues  
15 about challenging patients, medical management, staff, or personal issues, and was facilitated  
16 by organisational practices encompassing physical (e.g., having a common tea-room), social  
17 (e.g., protected breaks, and collegial social activities), and work domains (e.g., efficient  
18 practice management, routine workflow, and infrastructure).  
19  
20  
21  
22

23  
24 *‘Ahh, having a good bunch of people to work with, people who are working together*  
25 *in an environment that is safe, there is timetabling of patients, that we are able to*  
26 *have a tea break, toilet break, lunch break, and be able to respond to patients’ needs*  
27 *as they arise, at the same time. That is important in a clinical setting.’ (GP3)*  
28  
29  
30  
31

32 GPs perceived working in competitive or negative team climates as highly detrimental to  
33 their wellbeing (Table 2g). This was more often expressed by participants in metropolitan  
34 practices, where practices reportedly skimp on tea-rooms, and doctors routinely work through  
35 lunch breaks due to financial strains related to significantly higher living expenses than in  
36 regional/rural areas (Table 2h). Effective practice leadership was helpful, whereas a lack of  
37 management understanding was detrimental.  
38  
39  
40  
41  
42  
43

44 High workload and the pressure to see patients, sometimes coupled with insufficient staffing  
45 were frequently cited as barriers to wellbeing.  
46  
47

48 *‘...I feel that there is a real sausage factory sort of approach to it in Sydney. It’s just*  
49 *bang, bang, bang, go, go, go.’ (GP12)*  
50  
51

52  
53 Additionally, GPs frequently encountered unrealistic expectations from patients at their  
54 practice, including to receive services for free (Table 2i).  
55

56 *‘...You see a number of patients that basically see you as the local Coles*  
57 *[supermarket]. “OK, doctor, I need my prescription, and I need my referral...” And*  
58  
59  
60

1  
2  
3 *you know, you are just a dispensing machine, an ATM. And it doesn't cost them*  
4 *anything because you are bulk billing.'* (GP14)  
5  
6  
7

8 Having a mentor or supervisor who modelled how to maintain personal wellbeing was seen  
9 as important to learning how to prioritise personal wellbeing, particularly for GP registrars.

10  
11 *'...I think we need to be modelling. Because I think if people are going through the*  
12 *training and not experiencing any different, we shouldn't be surprised that they then*  
13 *become like 30, 40, 50-year-old GPs who are totally burnt out, and have no sense of*  
14 *what's actually important for their self-care.'* (GP12)  
15  
16  
17  
18

### 19 20 21 *Profession*

22 This included determinants of wellbeing originating from within the GP community, and  
23 their representative bodies. Many interviewees were dissatisfied with their professional  
24 college because they felt ill-represented, or even that the college was actively working  
25 against them. Consequently, several participants withdrew their college membership.

26  
27  
28 *'And I do find that the college completely useless at sticking up for GPs. I refuse to*  
29 *join them. I find them very frustrating. They don't, in my opinion, act as a good voice*  
30 *for us. So, mostly I work around them.'* (GP6)  
31  
32  
33  
34  
35

36 GPs were either only vaguely aware of college support resources for wellbeing, or weren't  
37 interested (Table 2j). The college representing rural practitioners, GP training organisations  
38 were seen to offer more tangible support.  
39  
40  
41

### 42 43 *System*

44 The subtheme most frequently emphasised by GPs during the interviews was a sense of not  
45 being valued, and a lack of appreciation, respect, and support. Whilst this mostly related to  
46 the systems theme, it was found throughout.  
47  
48

49 *'And I think the government just think we are a disorganised bunch, and who we can*  
50 *just brush aside, and they will go the extra mile for their patients... Unless GPs get*  
51 *organised, and more militant, then we're just going to be ground.'* (GP9)  
52  
53  
54  
55

56 Participants expressed, that others' lack understanding of what a GP does on a daily basis,  
57 and the importance GPs play in the provision of population health (Table 2k).  
58  
59  
60

1  
2  
3 *'I think if more people had a concept of what general practice actually can do, and*  
4 *what it does, there would be a lot more respect.'* (GP17)  
5  
6  
7

8 This lack of understanding was exemplified by limited GP consultation by the government  
9 concerning the Covid-19 response, and vaccination rollout (Table 2l).  
10  
11  
12

13 The fear of billing audits by Medicare (definition, Supplement 2), formal patient complaints  
14 (Table 2m & 2n), litigation threats, and bad media press compounded the lack of valuation.  
15  
16

17 *'Well, I think the Medicare audits – although I've been lucky enough not to receive an*  
18 *audit letter yet – I think that has sent ... a whole load of fear through a lot of GPs*  
19 *who've tried to do the right thing'.* (GP11)  
20  
21  
22

23 Over-specialisation (Table 2f) and GP shortages, as well as working in silos, rather than hand  
24 in hand (i.e., with other healthcare providers, between federal and state agencies) were  
25 mentioned by a small proportion of GPs.  
26  
27  
28

### 30 *Finances*

31 Financial aspects were interlinked with all themes, and directly and indirectly determined  
32 wellbeing (Figure 2). Two drivers were external, one was internal: Firstly, Medicare rebate  
33 structure that determined fee for services (Supplement 2) was closely tied to a sense of being  
34 valued, and personal wellbeing. Secondly, fee structure drove patient behaviour, which  
35 impacted on GPs overall and financial wellbeing. And thirdly, remuneration influenced GPs'  
36 behaviour. In our sample, several GPs responded to low rebate structure and high patient  
37 expectations with increasing patient throughput and foregoing work breaks, with implications  
38 for their wellbeing.  
39  
40  
41  
42  
43  
44  
45  
46  
47

48 Remuneration was perceived as a direct reflection of the value of a profession, a service, and  
49 a proxy for the outright value of a GP individually.  
50

51 *"...To me, so, I'm really sort of fed up [with the Medicare rebate] —disillusioned*  
52 *with—where we're at this stage, you know. And that, doesn't help our wellbeing*  
53 *because we don't—we feel undervalued. And the government has done nothing to*  
54 *really, you know, show any positive change in that respect. So definitely, and I don't*  
55 *really know the way out of that, because, you know, even if they were to increase the*  
56 *rebate a small amount, it still doesn't really reflect, you know, the amount of effort*  
57  
58  
59  
60



1  
2  
3 *that we put into our patients, and the preventative side of things, I mean the amount of*  
4 *work we're doing to prevent hospitalisations and, all of that sort of thing.' (GP15)*  
5  
6  
7

8 GPs voiced frustration with the cutbacks of billable Medicare items (Supplement 2) crucial to  
9 general practice, and the impact that had on their wellbeing (Table 2o).  
10  
11  
12

13 GPs described two factors that influenced their income: the volume of patients seen; and  
14 how, and what they billed. High patient throughput was sometimes driven by practice  
15 owners, but more often by personal financial pressures. Particularly, when the GP was the  
16 main breadwinner, lived in a metropolitan area, and/or the practice bulk billed only, there was  
17 significant pressure to see as many patients as possible. For example, one participant saw  
18 over one thousand bulk billed patients per month. Some GPs charged patient gap payments  
19 above the Medicare rebate, to reflect the value they attributed to their expertise and services  
20 (Table 2p). Whilst others reported a reluctance to privately bill their patients, or  
21 unwillingness to argue with patients over charging the gap between private and bulk billing  
22 (Table 2q).  
23  
24  
25  
26  
27  
28  
29

30 'Time is money' was a frequently reported concept, which directly impacted on some GPs'  
31 willingness to work less, and spend time on activities that they knew improved wellbeing,  
32 such as taking breaks, engaging in reflective practice, or attending peer review groups.  
33  
34  
35

36 *'Fundamentally, I think the issue is ... the way that we're paid. And because we only*  
37 *generate billings when we're seeing patients it just sort of warps your whole view of,*  
38 *you know, what's worthwhile doing.' (GP12)*  
39  
40  
41  
42

43 According to one participant, GPs were ill-informed about Medicare's billing structure  
44 available to general practice (Table 2r). Indeed, several interviewees stated not being well  
45 versed or interested in financial management, so some deliberately engaged an accountant.  
46 For GP registrars the financial pressures were compounded, as they are salaried, and  
47 remuneration is typically lower than for a fully qualified GP. Unpaid maternity leave was a  
48 relevant consideration (Table 2s), however, high autonomy and flexible working  
49 arrangements were specifically stated by women as key benefits of going into general  
50 practice (Table 2t).  
51  
52  
53  
54  
55  
56  
57

58 Overall, what was most striking, was the tension and complex balancing act required between  
59 all determinants, at the centre of which stood the individual GP. We didn't observe a  
60

1  
2  
3 simplistic ‘work-life balance’, i.e., predicted on reducing hours and demands at ‘work’ to  
4 enable more ‘life’. In this cohort much of GPs’ sense of self—and wellbeing—lay in how  
5 they viewed themselves professionally, including their working life. Seen through this lens, it  
6 becomes clear that simple interventions, i.e., to offer resilience and wellbeing seminars will  
7 not suffice (Table 2j).  
8  
9  
10  
11  
12  
13  
14

## 15 **DISCUSSION**

### 16 *Summary*

17  
18  
19 Determinants of wellbeing were qualitatively explored in the interviews. We presented five  
20 themes each with subthemes: identity / self, organisation, profession, system, and finances.  
21 They are all are strongly interconnected, and each has several subthemes (see figure 1). GPs  
22 provided numerous examples of the tension they navigate between competing interests: their  
23 own, as well as those imposed by others. If the balance is off kilter, wellbeing suffers.  
24  
25  
26  
27  
28  
29

30  
31 GP wellbeing—or lack thereof—is a complex interplay between different determinants, and  
32 stakeholders. The main, underlying determinant of wellbeing—correlated with, and  
33 represented by remuneration—seems to be inadequate professional value and recognition.  
34 Our participants reported feeling unappreciated from several sources, but consistently  
35 reported that by far the most impactful effects on their wellbeing were those emanating from  
36 the system. If GPs and their services are undervalued, personally and professionally, it  
37 depletes their wellbeing. GPs largely counter-balance this personally as best they can, and  
38 crucially, through informal peer support. When these mechanisms are exhausted or  
39 impossible, wellbeing quickly deteriorates. Furthermore, several GPs compensate low  
40 remuneration, inadequate professional recognition, and high patient demand with means  
41 detrimental to their wellbeing (i.e., by working harder, Figure 2).  
42  
43  
44  
45  
46  
47  
48  
49

50 GPs’ inherent resilience, ability, and sense of duty are in large parts responsible for good  
51 health outcomes. However, for many it may be a delicate balance, one that expends much  
52 energy, and hence likely isn’t sustainable indefinitely. Above mechanisms may also explain  
53 why resilience and mindfulness interventions are not overly effective (39), nor welcomed by  
54 practitioners. GPs are the backbone of primary healthcare, and yet this service appears to rely  
55 on GPs’ good-will, and professional dedication. Primary care is the most (cost-) effective  
56  
57  
58  
59  
60

avenue to manage population health (53), hence policy makers must do their utmost to value and enable GPs, particularly given the added strain, and GPs role, during the pandemic.

### *Comparison with existing literature*

We contextualised our findings within qualitative research on wellbeing, as seen through a positive lens, and related constructs such as satisfaction. We contrasted our findings with selected quantitative research directly relevant to the Australian general practice landscape. A UK group conducted focus groups with 25 GPs to identify factors that contribute to burnout and poor wellbeing, and strategies to improve both. Similar to our results, they identified the importance of team support, taking breaks, variety of, and control over their work, on an internal level; and wider governmental and public support, resources, and funding on an external level (54). British GP trainee focus groups (n=16) discussed the benefits of supportive professional relationships (i.e., supportive trainers), control over workload, and barriers to wellbeing of ‘not being valued’, and work-life imbalance (55). The European General Practice Research Network interviewed 183 GPs across eight countries, and described factors that promote job satisfaction: freedom to organise and choose their practice environment; professional education; and establishing strong patient-doctor relationships (56). Interestingly, patient-doctor relationships and professional education were not mentioned in our cohort. It was more a case of patient expectations being detrimental to wellbeing, and role modelling for registrars being useful. Female rural family doctors in the USA were interviewed regarding practice attributes that promote satisfaction, whereby supportive professional relationships were crucial (57). Our interviewees described the importance of professional peer support, and particularly women appreciated the autonomy and flexibility to choose when, and where to work.

In the UK, a qualitative study examined why GPs leave direct patient care. Reasons were complex, but in alignment with our cohort, included personal and professional identity issues, the value perception of general practice within the health system, and risk (i.e., medical litigation) (58). In our interviews, stress of formal patient complaints and audits surfaced repeatedly. Similarly, a patients’ complaints culture, and defensive practice were also described as stressors in focus groups exploring GP resilience and coping (59).

A systematic review thematically analysed studies broadly focusing on positive factors related to general practice. They discerned general medical workforce themes, general practice specific themes, and professional/personal issues impacting on GP satisfaction in clinical practice (60). Subthemes included balance between income and workload; flexibility,

1  
2  
3 variety, and freedom to choose work; responsibility, competency, recognition; positive self-  
4 image, personality, and values; and relationships with community, patients, carers, and other  
5 professionals (60). So overall, previous qualitative research in different contexts demonstrate  
6 alignment with our results.  
7  
8  
9

10  
11 Our data also shows similarities with important Australian quantitative data on life and job  
12 satisfaction, particularly regarding remuneration, value, and the strain of maintaining balance.  
13 The 'Medicine in Australia – Balancing Employment and Life' (MABEL) surveys, were  
14 conducted annually from 2008 to 2018 with yearly participant numbers of >3000 GPs (11,  
15 61-68), and the RACGP regularly commissions surveys, and reports (14, 69). GPs are most  
16 satisfied with variety and choosing how to work, least satisfied with remuneration and  
17 recognition, and about half of surveyed GPs report that maintaining work-life balance is a  
18 challenge (14, 67, 69, 70). Over several years, >40% of GPs have identified Medicare rebates  
19 as a top priority for policy action (14). Positive associations for job satisfaction in all doctor  
20 types include doctor characteristics (age close to retirement, Australian trained, good health);  
21 social characteristics (living with a partner, social interaction); and job characteristics (part-  
22 time work, opportunities for professional development, support networks, realistic patient  
23 expectations) (63, 64).  
24  
25  
26  
27  
28  
29  
30  
31  
32  
33

34 Whilst surveys highlight correlations, they do not demonstrate causation. Our nuanced,  
35 qualitative exploration sheds light on multiple determinants of Australian GPs' wellbeing  
36 and, most importantly, how they are interrelated and which mechanisms (i.e., financial  
37 drivers, lack of value) underpin everything.  
38  
39  
40  
41  
42

### 43 *Strengths and limitations*

44 Strengths include the diversity of participants and their combined wealth of experience  
45 (Table 1). GPs rich and nuanced recounts enabled in-depth analysis of determinants of their  
46 personal wellbeing.  
47  
48

49 Limitations include selection bias often inherent in qualitative research with voluntary  
50 participation. We purposely only included GPs working in Australia for practicability  
51 reasons, and local relevance. These results may not equally apply to GPs working elsewhere,  
52 different factors may be present for GPs in other countries, particularly around funding  
53 structures and policy.  
54  
55  
56  
57

58 There are many definitions of wellbeing in the literature (71), which adds complexity to  
59 research in this space. For quantitative studies a wellbeing definition and dedicated measure  
60

1  
2  
3 can should be selected (39). We did not define wellbeing for our participants, but rather let  
4 them use their own conceptualisation, so as to not bias participants' answers.

5  
6 Mean interview duration was 32 minutes. Conducting longer interviews with busy GPs  
7 during a global pandemic was impossible.

8  
9 Sample sizes in qualitative research are generally small (n=20 in this study), hence, we  
10 suggest these findings be verified more broadly in an Australia-wide survey, using a  
11 dedicated wellbeing metric.  
12  
13  
14  
15

### 16 17 *Implications for research and/or practice*

18 To prioritise GP wellbeing, we need to understand determinants and how they interplay. GPs  
19 expend effort to navigate internal and external forces that impact on their wellbeing.

20 Our data suggests it does not suffice to address the individual GP by offering wellbeing  
21 workshops to them. Instead, organisational, and professional structures need to be targeted  
22 and this will require policy advocacy. The determinants that need to change in order to  
23 fundamentally shift the perceived value of general practice, and avoid band-aid solutions  
24 must be prioritised. Strategies to advance these issues were raised in the interviews, and are  
25 detailed in our subsequent publication.  
26  
27  
28  
29  
30  
31

32 Regarding research implications, we recommend a focus on organisational, professional, and  
33 systemic interventions. This is more complex and costly than interventions on the individual  
34 (GP) level, but presumably more useful and sustainable. Research into interventions for  
35 health care professionals necessitates the same dedication and funding as research aimed at  
36 improving patient outcomes because a general practitioner who is well and satisfied, is better  
37 equipped to provide quality care to others.  
38  
39  
40  
41  
42  
43

## 44 45 **CONCLUSION**

46 GPs are walking a tight rope that requires careful balance between complex and  
47 interconnected determinants of wellbeing, whereby value, remuneration, and peer support are  
48 crucial.  
49

50 Organisations, professional bodies, and policy makers have an untapped opportunity to  
51 enable and support GPs' wellbeing, with benefits to practitioners, their families, their  
52 patients, the sustainability of the general practice workforce, and population health.  
53  
54  
55  
56  
57

## 58 59 **ACKNOWLEDGMENTS**

60

1  
2  
3 *Acknowledgements*  
4

5 First and foremost, we would like to thank all participants for sharing their time and insights.  
6 We would like to acknowledge the support extended by the Central and Eastern Sydney  
7 Primary Health Network, New South Wales; the Murray Primary Health Network, Victoria;  
8 and Healius Pty Ltd, Australia.  
9  
10  
11  
12

13 *Registration*  
14

15 Not applicable.  
16  
17

18 *Ethics approval statement*  
19

20 This study was approved by the University of Sydney Human Research and Ethics  
21 Committee (2020/822).  
22  
23  
24

25 *Funding statement*  
26

27 Dr Diana Naehrig was supported through the Raymond Seidler PhD scholarship. The funding  
28 source had no influence on the study design, collection, analysis or interpretation of data, the  
29 writing of the manuscript nor the decision to submit the article for publication. Award/Grant  
30 number is not applicable.  
31  
32  
33  
34

35  
36 This research was supported (partially or fully) by the Australian Government through the  
37 Australian Research Council's Centre of Excellence for Children and Families over the Life  
38 Course (Project ID CE200100025).  
39

40 The funding source did not have any influence on the design or conduct of this research.  
41  
42  
43  
44

45 *Competing interest statement*  
46

47 Beyond the Raymond Seidler PhD scholarship for DN, and support for NG, AM and CK  
48 through ARC's Centre of Excellence for Children and Families over the Life Course (Project  
49 ID CE200100025) there was no support from any organisation for the submitted work. Ian  
50 Hickie has competing interests to declare. All other authors have no competing interests to  
51 declare.  
52  
53  
54  
55  
56

57 *Contributorship statement*  
58  
59  
60

1  
2  
3 DNA is the guarantor and corresponding author and attests that DN, NG, CK, LA, BG, IH,  
4 AM meet authorship criteria and that no others meeting the criteria have been omitted. All  
5 authors critically revised and approved the final version of the manuscript to be published.  
6  
7 Specifically, DN devised, and contributed to the study conception and design, acquisition of  
8 data, analysis of the data, interpretation of the data, drafted the manuscript, finalised the  
9 manuscript for reporting, and acts as corresponding author.

10  
11 NG contributed to the study conception and design, acquisition of data, analysis of the data,  
12 interpretation of the data, assisted in drafting the manuscript, and revising the final  
13 manuscript for reporting.

14  
15 CK contributed to analysis of the data, interpretation of the data, assisted in drafting the  
16 manuscript, and revising the final manuscript for reporting.

17  
18 LA contributed to the study conception and design, acquisition of data, interpretation of the  
19 data, assisted in drafting the manuscript, and revising the final manuscript for reporting.

20  
21 BG contributed to the study conception and design, acquisition of data, assisted in drafting  
22 the manuscript, and revising the final manuscript for reporting.

23  
24 IH contributed to the study conception and design, and revising the final manuscript for  
25 reporting.

26  
27 AM contributed to the study conception and design, acquisition of data, analysis of the data,  
28 interpretation of the data, assisted in drafting the manuscript, and revising the final  
29 manuscript for reporting.

#### 30 31 32 *Transparency declaration*

33 Dr Diana Naehrig (the manuscript's guarantor) affirms that the manuscript is an honest,  
34 accurate, and transparent account of the study being reported.

#### 35 36 37 *Data sharing statement*

38 We will consider sharing de-identified data upon reasonable request.

#### 39 40 41 *Copyright*

42 Dr Diana Naehrig (corresponding author) has the right to grant on behalf of all authors and  
43 does grant on behalf of all authors, an exclusive licence on a worldwide basis to the BMJ  
44 Publishing Group Ltd to permit this article to be published in BMJ editions and any other  
45  
46  
47  
48  
49  
50  
51  
52  
53  
54  
55  
56  
57  
58  
59  
60

1  
2  
3 BMJPGGL products and sublicences such use and exploit all subsidiary rights, as set out in our  
4 licence.  
5  
6  
7  
8  
9

10 Figure 1. Determinants of wellbeing in General Practitioners and their interaction.  
11  
12

13 Figure 2. Mechanisms of the negative impact of finances on the wellbeing of General  
14 Practitioners.  
15  
16  
17  
18  
19  
20  
21  
22  
23  
24  
25  
26  
27  
28  
29  
30  
31  
32  
33  
34  
35  
36  
37  
38  
39  
40  
41  
42  
43  
44  
45  
46  
47  
48  
49  
50  
51  
52  
53  
54  
55  
56  
57  
58  
59  
60

For peer review only



## REFERENCES

1. Wallace JE, Lemaire JB, Ghali WA. Physician wellness: a missing quality indicator. *The Lancet*. 2009;374(9702):1714-21.
2. Dunn PM, Arnetz BB, Christensen JF, Homer L. Meeting the imperative to improve physician well-being: Assessment of an innovative program. *J Gen Intern Med*. 2007;22(11):1544-52.
3. Luchterhand C, Rakel D, Haq C, Grant L, Byars-Winston A, Tyska S, et al. Creating a Culture of Mindfulness in Medicine. *Wmj*. 2015;114(3):105-9.
4. Spinelli WM. The phantom limb of the triple aim. *Mayo Clin Proc*. 2013;88(12):1356-7.
5. Addicott R, Maguire D, Honeyman M, Jabbal J. Workforce planning NHS Kings Fund. London: The King's Fund; 2015.
6. Nussbaum C, Massou E, Fisher R, Morciano M, Harmer R, Ford J. Inequalities in the distribution of the general practice workforce in England: a practice-level longitudinal analysis. *BJGP Open*. 2021.
7. Abel GA, Gomez-Cano M, Mustafee N, Smart A, Fletcher E, Salisbury C, et al. Workforce predictive risk modelling: development of a model to identify general practices at risk of a supply-demand imbalance. *BMJ Open*. 2020;10(1):e027934.
8. Sandhu D, Blythe A, Nayar V. How can medical schools create the general practice workforce? An international perspective. *MedEdPublish*. 2020;9(1).
9. National Medical Workforce Strategy - Investing in our medical workforce to meet Australia's health needs. The Department of Health, Australian Government; 2021.
10. National Medical Workforce Strategy - Scoping Framework. Canberra: Australian Government. Department of Health.; 2019.
11. Scott A. The evolution of the medical workforce. ANZ Health Sector Report: Melbourne Institute: Applied Economic and Social Research, The University of Melbourne; 2021 03/06/2021.
12. General Practice Workforce providing Primary Care services in Australia. Statistics by calendar year 2014 - 2019. Canberra: Australian Government. Department of Health.; 2020.
13. Scott A, Witt J, Humphreys J, Joyce C, Kalb G, Jeon SH, et al. Getting doctors into the bush: general practitioners' preferences for rural location. *Soc Sci Med*. 2013;96:33-44.
14. RACGP. General Practice: Health of the Nation 2020. East Melbourne, Vic: The Royal Australian College of General Practitioners. ; 2020.
15. Medical Education and Training (MET) - 4th edition. Canberra: Australian Government. Department of Health.; 2019.
16. Beech J, Bottery S, Charlesworth A, Evans H, Gershlick B, Hemmings N, et al. Closing the gap. The Health Foundation. The King's Fund. Nuffield Trust.; 2019.
17. MSOD. National Data Report 2020, 2015-2019, Data from Final Year Medical Students at Australian Medical Schools. Medical Deans Australia and New Zealand. Medical Schools Outcome Database.; 2020.
18. Deloitte. General Practitioner workforce report. Deloitte access economics; 2019.
19. Scott A. The impact of COVID-19 on GPs and non-GP specialists in private practice. The University of Melbourne.: Melbourne Institute of Applied Economic and Social Research.; 2020.
20. RACGP. The Royal Australian College of General Practitioners. Annual report 2019–20. . East Melbourne, Vic: RACGP; 2020.

- 1
- 2
- 3
- 4 21. RACGP. GP wellbeing Royal Australian College of General Practitioners Website.
- 5 2021 [Available from: [https://www.racgp.org.au/running-a-practice/practice-](https://www.racgp.org.au/running-a-practice/practice-management/gp-wellbeing)
- 6 [management/gp-wellbeing](https://www.racgp.org.au/running-a-practice/practice-management/gp-wellbeing).
- 7 22. Harvey SB, Epstein RM, Glozier N, Petrie K, Strudwick J, Gayed A, et al. Mental illness
- 8 and suicide among physicians. *The Lancet*. 2021;398(10303):920-30.
- 9 23. Petrie K, Crawford J, Baker STE, Dean K, Robinson J, Veness BG, et al. Interventions
- 10 to reduce symptoms of common mental disorders and suicidal ideation in physicians: a
- 11 systematic review and meta-analysis. *The Lancet Psychiatry*. 2019;6(3):225-34.
- 12 24. West C, Dyrbye L, Erwin P, Shanafelt T. Interventions to prevent and reduce
- 13 physician burnout: a systematic review and meta-analysis. *The Lancet*.
- 14 2016;388(10057):2272-81.
- 15 25. West CP, Dyrbye LN, Shanafelt TD. Physician burnout: contributors, consequences
- 16 and solutions. *Journal of Internal Medicine*. 2018;283(6):516-29.
- 17 26. Panagioti M, Geraghty K, Johnson J. How to prevent burnout in cardiologists? A
- 18 review of the current evidence, gaps, and future directions. *Trends Cardiovasc Med*.
- 19 2018;28(1):1-7.
- 20 27. Panagioti M, Geraghty K, Johnson J, Zhou A, Panagopoulou E, Chew-Graham C, et al.
- 21 Association Between Physician Burnout and Patient Safety, Professionalism, and Patient
- 22 Satisfaction: A Systematic Review and Meta-analysis. *JAMA Intern Med*. 2018;178(10):1317-
- 23 30.
- 24 28. Panagioti M, Panagopoulou E, Bower P, Lewith G, Kontopantelis E, Chew-Graham C,
- 25 et al. Controlled interventions to reduce burnout in physicians: a systematic review and
- 26 meta-analysis. *JAMA internal medicine*. 2017;177(2):195-205.
- 27 29. Riley R, Spiers J, Buszewicz M, Taylor AK, Thornton G, Chew-Graham CA. What are
- 28 the sources of stress and distress for general practitioners working in England? A qualitative
- 29 study. *BMJ Open*. 2018;8(1):e017361.
- 30 30. Kay M, Mitchell G, Clavarino A. What doctors want? A consultation method when
- 31 the patient is a doctor. *Australian Journal of Primary Health*. 2010;16(1):52-9.
- 32 31. Kay M, Mitchell G, Clavarino A, Doust J. Doctors as patients: a systematic review of
- 33 doctors' health access and the barriers they experience. *Br J Gen Pract*. 2008;58(552):501-8.
- 34 32. Kay M, Mitchell G, Clavarino A, Frank E. Developing a framework for understanding
- 35 doctors' health access: a qualitative study of Australian GPs. *Aust J Prim Health*.
- 36 2012;18(2):158-65.
- 37 33. Clough B, March S, Leane S, Ireland M. What prevents doctors from seeking help for
- 38 stress and burnout? A mixed-methods investigation among metropolitan and regional-
- 39 based Australian doctors. *J Clin Psychol*. 2019;75(3):418-32.
- 40 34. Spiers J, Buszewicz M, Chew-Graham CA, Gerada C, Kessler D, Leggett N, et al.
- 41 Barriers, facilitators, and survival strategies for GPs seeking treatment for distress: a
- 42 qualitative study. *Br J Gen Pract*. 2017;67(663):e700-e8.
- 43 35. Murray MA, Cardwell C, Donnelly M. GPs' mental wellbeing and psychological
- 44 resources: a cross-sectional survey. *Br J Gen Pract*. 2017;67(661):e547-e54.
- 45 36. Murray MA, Murray L, Donnelly M. Systematic review of interventions to improve
- 46 the psychological well-being of general practitioners. *BMC Family Practice*. 2016;17(1).
- 47 37. Hall LH, Johnson J, Heyhoe J, Watt I, Anderson K, O'Connor DB. Strategies to improve
- 48 general practitioner well-being: findings from a focus group study. *Fam Pract*.
- 49 2018;35(4):511-6.
- 50
- 51
- 52
- 53
- 54
- 55
- 56
- 57
- 58
- 59
- 60

- 1  
2  
3 38. Hall LH, Johnson J, Watt I, O'Connor DB. Association of GP wellbeing and burnout  
4 with patient safety in UK primary care: a cross-sectional survey. *Br J Gen Pract.*  
5 2019;69(684):e507-e14.  
6  
7 39. Naehrig D, Schokman A, Hughes JK, Epstein R, Hickie IB, Glozier N. Effect of  
8 interventions for the well-being, satisfaction and flourishing of general practitioners-a  
9 systematic review. *BMJ Open.* 2021;11(8):e046599.  
10  
11 40. Braun V, Clarke V. What can "thematic analysis" offer health and wellbeing  
12 researchers? *Int J Qual Stud Health Well-being.* 2014;9:26152.  
13  
14 41. Braun V, Clarke V. Using thematic analysis in psychology. *Qualitative Research in*  
15 *Psychology.* 2006;3(2):77-101.  
16  
17 42. Clarke V, Braun V. Thematic analysis. *The Journal of Positive Psychology.*  
18 2016;12(3):297-8.  
19  
20 43. Braun V, Clarke V. Thematic analysis. *APA handbook of research methods in*  
21 *psychology, Vol 2: Research designs: Quantitative, qualitative, neuropsychological, and*  
22 *biological*2012. p. 57-71.  
23  
24 44. Archer M, Bhaskar R, Collier A, Lawson T, (eds) NA. *Critical realism: Essential*  
25 *readings*2013.  
26  
27 45. Tong A, Sainsbury P, Craig J. Consolidated criteria for reporting qualitative research  
28 (COREQ): a 32-item checklist for interviews and focus groups. *International journal for*  
29 *quality in health care.* 2007;19(6):349-57.  
30  
31 46. Barry C, Britten N, Barber N, Bradley C, F. S. Using reflexivity to optimize teamwork in  
32 qualitative research. *Qual Health Res.* 1999(9):26-44.  
33  
34 47. Sandelowski M, Docherty S, Emden C. Focus on qualitative methods. Sample size in  
35 qualitative research *Research in Nursing & Health.* 1995;18:179-83.  
36  
37 48. Rice PL, Ezzy D. *Qualitative research methods: A health focus.* Melbourne, Australia.  
38 1999.  
39  
40 49. Fusch PI, Ness LR. Are we there yet? Data saturation in qualitative research. *The*  
41 *Qualitative Report.* 2015;20(9):1408-16.  
42  
43 50. Francis JJ, Johnston M, Robertson C, Glidewell L, Entwistle V, Eccles MP, et al. What  
44 is an adequate sample size? Operationalising data saturation for theory-based interview  
45 studies. *Psychology and health.* 2010;25(10):1229-45.  
46  
47 51. NVivo 12: QSR International Pty Ltd.; 2020 [Available from:  
48 <https://www.qsrinternational.com/nvivo-qualitative-data-analysis-software/home>.  
49  
50 52. O'Connor C, Joffe H. Intercoder Reliability in Qualitative Research: Debates and  
51 Practical Guidelines. *International Journal of Qualitative Methods.* 2020;19.  
52  
53 53. Scott A, S. J. *Primary Care.* Oxford: Oxford University Press; 2011.  
54  
55 54. Hall LH, Johnson J, Heyhoe J, Watt I, Anderson K, O'Connor DB. Strategies to improve  
56 general practitioner well-being: findings from a focus group study. *Fam Pract.*  
57 2018;35(4):511-6.  
58  
59 55. Ansell S, Read J, Bryce M. Challenges to well-being for general practice trainee  
60 doctors: a qualitative study of their experiences and coping strategies. *Postgrad Med J.*  
2020;96(1136):325-30.  
56  
57 56. Le Floch B, Bastiaens H, Le Reste JY, Lingner H, Hoffman R, Czachowski S, et al. Which  
positive factors give general practitioners job satisfaction and make general practice a  
rewarding career? A European multicentric qualitative research by the European general  
practice research network. *BMC Fam Pract.* 2019;20(1):96.

- 1
- 2
- 3
- 4 57. Hustedde C, Paladine H, Wendling A, Prasad R, Sola O, Bjorkman S, et al. Women in
- 5 rural family medicine: a qualitative exploration of practice attributes that promote physician
- 6 satisfaction. *Rural Remote Health*. 2018;18(2):4355.
- 7 58. Sansom A, Terry R, Fletcher E, Salisbury C, Long L, Richards SH, et al. Why do GPs
- 8 leave direct patient care and what might help to retain them? A qualitative study of GPs in
- 9 South West England. *BMJ Open*. 2018;8(1):e019849.
- 10 59. Cheshire A, Ridge D, Hughes J, Peters D, Panagioti M, Simon C, et al. Influences on GP
- 11 coping and resilience: a qualitative study in primary care. *Br J Gen Pract*. 2017;67(659):e428-
- 12 e36.
- 13 60. Le Floch B, Bastiaens H, Le Reste JY, Lingner H, Hoffman RD, Czachowski S, et al.
- 14 Which positive factors determine the GP satisfaction in clinical practice? A systematic
- 15 literature review. *BMC Fam Pract*. 2016;17(1):133.
- 16 61. Scott A. The impact of COVID-19 on GPs and non-GP specialists in private practice.
- 17 Melbourne Institute: Applied Economic & Social Research, The University of Melbourne;
- 18 2020.
- 19 62. Scott A. General Practice Trends. The University of Melbourne, Melbourne.:  
20 Melbourne Institute: Applied Economic and Social Research; 2017.
- 21 63. Joyce C, Wang WC. Job satisfaction among Australian doctors: the use of latent class  
22 analysis. *Journal of Health Services Research and Policy*. 2015;20(4):224-30.
- 23 64. Joyce CM, Schurer S, Scott A, Humphreys J, Kalb G. Australian doctors' satisfaction  
24 with their work: results from the MABEL longitudinal survey of doctors. 2011.
- 25 65. Joyce CM, Scott A, Jeon SH, Humphreys J, Kalb G, Witt J, et al. The "medicine in  
26 Australia: balancing employment and life (MABEL)" longitudinal survey--protocol and  
27 baseline data for a prospective cohort study of Australian doctors' workforce participation.  
28 *BMC Health Serv Res*. 2010;10:50.
- 29 66. Rodwell J, Gulyas A. A taxonomy of primary health care practices: An avenue for  
30 informing management and policy implementation. *Australian Journal of Primary Health*.  
31 2013;19(3):236-43.
- 32 67. Shrestha D, Joyce CM. Aspects of work-life balance of Australian general  
33 practitioners: determinants and possible consequences. *Australian Journal of Primary  
34 Health*. 2011;17(1):40-7.
- 35 68. *Medicine in Australia: Balancing Employment and Life*,  
36 Australia's national longitudinal survey of doctors: Melbourne Institute, University of  
37 Melbourne; 2021 [Available from: <https://melbourneinstitute.unimelb.edu.au/mabel/home>.  
38 69. RACGP GP Survey. Melbourne: EY Sweeney; 2020.
- 39 70. McGrail MR, Humphreys JS, Scott A, Joyce CM, & Kalb G. Professional satisfaction in  
40 general practice: does it vary by size of community? *Medical Journal of Australia*.  
41 2010;193(2):94-8.
- 42 71. Dodge R, Daly A, Huyton J, Sanders L. The challenge of defining wellbeing.  
43 *International Journal of Wellbeing*. 2012;2(3):222-35.
- 44
- 45
- 46
- 47
- 48
- 49
- 50
- 51
- 52
- 53
- 54
- 55
- 56
- 57
- 58
- 59
- 60

**Table 1. Demographics of interviewed General Practitioners (GPs)**

| Demographic                | N=20                       | Sub demographic                                                                                                                                                                                                                                                                           |
|----------------------------|----------------------------|-------------------------------------------------------------------------------------------------------------------------------------------------------------------------------------------------------------------------------------------------------------------------------------------|
| Sex                        | 11<br>9                    | Women<br>Men                                                                                                                                                                                                                                                                              |
| Experience                 | 2<br>2<br>4<br>4<br>4<br>4 | GP registrars (trainees)<br>GPs with 1 - 5 years of experience as a fellow<br>GPs with 6 - 10 years of experience as a fellow<br>GPs with 11 - 20 years of experience as a fellow<br>GPs with 21 - 30 years of experience as a fellow<br>GPs with 31 - 40 years of experience as a fellow |
| Current Location           | 15<br>3<br>1<br>1          | NSW (11 metropolitan, 4 regional)<br>VIC (2 metropolitan, 1 rural)<br>QLD (metropolitan)<br>SA (metropolitan)                                                                                                                                                                             |
| Previous location AUS      | 9                          | GPs had previously worked in Australian locations that included regional, rural, and remote settings across different states (NSW, QLD, VIC, SA, WA, NT).                                                                                                                                 |
| Previous location overseas | 10                         | GPs trained and / or worked overseas (including the United Kingdom, New Zealand, the Middle East, the Indian Subcontinent, and Africa).                                                                                                                                                   |
| Special interests          | 18                         | GPs had special interests including one or several of the following: rural medicine, aboriginal health, mental health, women's health, parental care, paediatrics, skin, eye health, sports medicine, veteran's health, prison health.                                                    |
| Other professional roles   | 10                         | GPs held other professional roles, sometimes including several of the following: academic (research & education), GP training, corporate & management, policy, medico legal, RACGP, ACRRM, practice accreditation, Australian defence force.                                              |
| Work arrangement           | 2<br>3<br>15               | GP registrars were salaried.<br>GPs currently were partners / principals in a practice, and several more had been practice-owners at some point during their career.<br>GPs provided clinical work as contractors, or have mixed arrangements depending on their roles.                   |
| Billing                    | 4<br>1<br>4<br>2<br>9      | Practices bulk billed only.<br>Practice billed privately only.<br>Practices had mixed billing.<br>Practices had other mixed means of funding (i.e., government grants)<br>Interviewees did not discuss practice billing structure.                                                        |

**Table 1.** NSW: New South Wales, VIC: Victoria, QLD: Queensland, SA: South Australia, WA: Western Australia, NT: Northern Territory, AUS: Australia, RACGP: Royal Australian College of General Practice, ACRRM: Australian College of Rural and Remote Medicine, bulk billing: Medicare rebates cover practitioner charges (no out of pocket fees for patients).

**Table 2. Determinants of Wellbeing - Verbatim Quotes**

| Quote | Themes<br>Subthemes                                                                                | Verbatim Data (participant code)                                                                                                                                                                                                                                                                                                                                                                                                                                                                                                                                                                |
|-------|----------------------------------------------------------------------------------------------------|-------------------------------------------------------------------------------------------------------------------------------------------------------------------------------------------------------------------------------------------------------------------------------------------------------------------------------------------------------------------------------------------------------------------------------------------------------------------------------------------------------------------------------------------------------------------------------------------------|
| a     | <b>Identity / Self</b><br><br>Wellbeing beliefs,<br>intentions & behaviour                         | <i>'...I think it's probably a case of the medical profession has lost control of wellbeing and it's now the domain of Instagram influencers. ... I think wellbeing as a principle is what we've been trying to do for years.'</i> (GP9)                                                                                                                                                                                                                                                                                                                                                        |
| b     | <b>Identity / Self</b><br><br>Exercise, Nutrition<br><br>Social connection<br><br>Leisure, hobbies | <i>'So that's probably exercise, and eating healthy, and being with friends and family is probably what keeps me well. ... I suppose having your work / life in balance, and still being able to function at work at an optimal level, and still be able to maintain all your responsibilities outside of work, with family and recreation, I suppose. And being happy with both aspects of your life.'</i> (GP18)                                                                                                                                                                              |
| c     | <b>Identity / Self</b><br><br>Responsibility,<br>Expectations,<br>Sense of duty                    | <i>'You know, you've just got to be professional. Doesn't matter how you're feeling, doesn't matter what's happening. Work is work. And, if you don't, bad things happen.'</i> (GP5)                                                                                                                                                                                                                                                                                                                                                                                                            |
| d     | <b>Identity / Self</b><br><br>Ability, High achiever,<br>Performance, Resilience                   | <i>'I expect myself to be more resilient [than others]. And I expect myself to cope with hardships.'</i> (GP8)                                                                                                                                                                                                                                                                                                                                                                                                                                                                                  |
| e     | <b>Identity / Self</b><br><br>Variation of work                                                    | <i>'If I work five, six, seven days [per week] in a general practice it really starts to affect you mentally. So, mixing it up is a fantastic way of keeping sane.'</i> (GP5)                                                                                                                                                                                                                                                                                                                                                                                                                   |
| f     | <b>System</b><br><br>Specialisation                                                                | <i>'The other things around the health system that I find very difficult and concerning, ... is the proliferation of sub-, sub-, super-specialists.... That puts an incredible strain on you as a GP because now suddenly, like a GP is supposed to know everything. ... You know, you're a sub-doctor in everything, or you're less of a doctor in everything because here these super-specialists telling you about the micro-details of how you should manage this one. But it also creates this huge gap. You're the generalist, and the next step is to this super-specialist.'</i> (GP14) |
| g     | <b>Organisation</b><br><br>Team & peer support                                                     | <i>'I think that's one of the most common causes of stress, depression, and mental illnesses in other practices, not having a good relationship with other GPs. ... Belittling the other GP, and telling the patients that the other GP isn't good enough, or things like that. Or going against the medical advice of the other GP, even though that may have been correct, you know, trying to win over the patient, things like that.'</i> (GP13)                                                                                                                                            |

|                                                                                                                                                                                                               |                                                                                    |                                                                                                                                                                                                                                                                                                                                                                                                                                                                                                                                                                                                                                                                                                                                                                                                                                                                                                                                                                                                                                                                                                                                                                                                                                                                                                                                                                                |
|---------------------------------------------------------------------------------------------------------------------------------------------------------------------------------------------------------------|------------------------------------------------------------------------------------|--------------------------------------------------------------------------------------------------------------------------------------------------------------------------------------------------------------------------------------------------------------------------------------------------------------------------------------------------------------------------------------------------------------------------------------------------------------------------------------------------------------------------------------------------------------------------------------------------------------------------------------------------------------------------------------------------------------------------------------------------------------------------------------------------------------------------------------------------------------------------------------------------------------------------------------------------------------------------------------------------------------------------------------------------------------------------------------------------------------------------------------------------------------------------------------------------------------------------------------------------------------------------------------------------------------------------------------------------------------------------------|
| <p>1<br/>2<br/>3<br/>4<br/>5<br/>6<br/>7<br/>8<br/>9<br/>10<br/>11<br/>12<br/>13<br/>14<br/>15<br/>16<br/>17<br/>18<br/>19<br/>20<br/>21<br/>22<br/>23<br/>24<br/>25<br/>26<br/>27<br/>28</p> <p><b>h</b></p> | <p><b>Organisation</b></p> <p>Local differences</p> <p>Team &amp; peer support</p> | <p><i>'And I feel quite strongly that general practice, particularly in [a metro area], is in a really bad state in relation to the lack of collegial relationships that most GPs have. And I really sense that moving from [a regional area], you know I came from – I worked in two separate practices as a registrar, with huge, big tearooms. We'd all sit down for like a one-and-a-half-hour lunch, just chat, connect, all that stuff. And then, I came back to [a metro area], and started going to interviews, and I said to everybody, like, 'Where are your tearooms? Where do you guys have lunch?' And they said, 'Oh, I don't know. Well, we were going to put a tearoom in, but we decided that, you know, we couldn't really afford it. We just had to put another consulting room in'. Or others were like, 'Well, I think the doctors just eat at their own table.' And so, that I found really shocking. And I know that it's, it's just one thing. But I think that that really symbolizes just how much of a commodity that the general practitioner is seen as. You know, in most urban contexts... is you just come in, you sit at your table, you see the patients, and you go home. And I think that there's a huge cost to that. You know that you're, that you're not having those, you know, informal chats over morning or lunch.'</i> (GP12)</p> |
| <p>29<br/>30<br/>31<br/>32<br/>33<br/>34</p> <p><b>i</b></p>                                                                                                                                                  | <p><b>Organisation</b></p> <p>Patient expectations</p>                             | <p><i>'Patients think that they can come in, and see you, and have a great amount of things dealt with. And if you deal with three of the sixteen things, they walk away feeling unhappy, even though they've booked 15 minutes [consultation].'</i> (GP20)</p>                                                                                                                                                                                                                                                                                                                                                                                                                                                                                                                                                                                                                                                                                                                                                                                                                                                                                                                                                                                                                                                                                                                |
| <p>35<br/>36<br/>37<br/>38<br/>39<br/>40<br/>41<br/>42<br/>43<br/>44<br/>45<br/>46<br/>47</p> <p><b>j</b></p>                                                                                                 | <p><b>Profession</b></p> <p>Professional support &amp; development</p>             | <p><i>'I mean [the term] 'work-life-balance' does me in. Because working 60 hours a week is fine for me. And being quiet drives me nuts. ... '...The college or the PHNs think they're fabulous when they put on a wellbeing weekend - and there's always a yoga class, you know, always a yoga class. I mean, what does that mean? That's a token, and the wellbeing industry is – the corporate life is all about talking about people's wellbeing, rather than providing real support. Communication, engagement, concern, yeah, the same as we look after our patients. And we don't get looked after by anyone.'</i> (GP9)</p>                                                                                                                                                                                                                                                                                                                                                                                                                                                                                                                                                                                                                                                                                                                                            |
| <p>48<br/>49<br/>50<br/>51<br/>52</p> <p><b>k</b></p>                                                                                                                                                         | <p><b>System</b></p> <p>Value, Understanding, Support</p>                          | <p><i>'Maybe people who go into politics of general practice really have forgotten the basics. Yes, I think 'naïve' is the word. I don't think they have a great idea of the day to day.'</i> (GP10)</p>                                                                                                                                                                                                                                                                                                                                                                                                                                                                                                                                                                                                                                                                                                                                                                                                                                                                                                                                                                                                                                                                                                                                                                       |
| <p>53<br/>54<br/>55<br/>56<br/>57<br/>58<br/>59<br/>60</p> <p><b>l</b></p>                                                                                                                                    | <p><b>System</b></p> <p>Value, Understanding, Support</p>                          | <p><i>'...With the vaccination programme...we weren't regarded as frontline workers, and we did Covid testing. We treat people with respiratory illness. And so, that was kind of - I think that was a diminishing thing, really, apart from you know, not feeling protected.'</i> (GP16)</p>                                                                                                                                                                                                                                                                                                                                                                                                                                                                                                                                                                                                                                                                                                                                                                                                                                                                                                                                                                                                                                                                                  |

|   |                                                       |                                                                                                                                                                                                                                                                                                                                                                                                                                                                                                                                                                                                                                                                                                                                                                          |
|---|-------------------------------------------------------|--------------------------------------------------------------------------------------------------------------------------------------------------------------------------------------------------------------------------------------------------------------------------------------------------------------------------------------------------------------------------------------------------------------------------------------------------------------------------------------------------------------------------------------------------------------------------------------------------------------------------------------------------------------------------------------------------------------------------------------------------------------------------|
| m | <b>System</b><br><br>Audits, Complaints,<br>Liability | <p><i>'This complaint, and all the other ones I've had, and other people I've seen ...</i></p> <p><i>There should be some sort of triage system [within the HCCC, Health Care Complaints Commission] where the crap is weeded out, to reduce the stress on GPs, and other doctors, and save time. And at the same time not discouraging complainants, but perhaps it could be dealt with at a lower level. (GP20)</i></p>                                                                                                                                                                                                                                                                                                                                                |
| n | <b>System</b><br><br>Audits, Complaints,<br>Liability | <p><i>'The other thing that can affect you, is probably if you get a few patient complaints to HCCC and AHPRA, or to the board. That actually brings your morale down quite a lot. It's one of the easiest things to complain against a doctor. You know, we're all soft targets.'</i> (GP13).</p>                                                                                                                                                                                                                                                                                                                                                                                                                                                                       |
| o | <b>Finances</b><br><br>System                         | <p><i>'But the wellbeing that GPs achieve, is by their own measures, and they are to counteract the negative pressures that come from outside this [consult] room. So ... the forces that are negative, are Medicare, and the way GPs are treated. Like the telehealth items are just going to be cut... ECGs [electro-cardiograms], that item was just cut. Joint injections, they were just cut.'</i> (GP9)</p>                                                                                                                                                                                                                                                                                                                                                        |
| p | <b>Finances</b><br><br>Organisation                   | <p><i>So, [we are] private billing ... with discretion, so that there will be some patients that, you know, we'll bulk bill. But generally - And, I always have that mindset that I'm not going to undervalue myself. Otherwise, yeah, you know, yeah... And I think my patients have appreciated, that I do that extra bit for them and, you know, and they appreciate what they get. So, but I still will get occasional patients who will try [to get bulk billing].'</i> (GP15)</p>                                                                                                                                                                                                                                                                                  |
| q | <b>Finances</b><br><br>Organisation                   | <p><i>'One of the things I like about a bulk billing practice, and it's good, I think, for my wellbeing - I have worked at some practices that charge. I hated the stress at the end of every consult where someone would be saying, "Please, can you just bulk bill me" or "I just can't pay this week". And honestly, it was a very stressful situation at the end of every consult...'</i> (GP2)</p>                                                                                                                                                                                                                                                                                                                                                                  |
| r | <b>Finances</b><br><br>Personal                       | <p><i>'Ahhm, I think GPs themselves hinder themselves. ... I think doctors' knowledge and understanding of Medicare, or GPs', is often appalling. ... They claim wrongly, they act poorly, they spend the public money poorly, and they're scared of things they shouldn't be scared of, or conversely, they're not scared of things they should be scared of. I think it's GPs themselves, not Medicare. ... It is ridiculous, because if you're a bulk billing GP your entire income is based on understanding that system, how can you possibly derive your income without understanding it? ... There is tons of information, Medicare videos, tutorials, loads of stuff on there, regular webinars. GPs do not educate themselves, it's their fault.'</i> (GP4)</p> |



|   |                                 |                                                                                                                                                                                                                                                                                                                                                                                                                                                                                               |
|---|---------------------------------|-----------------------------------------------------------------------------------------------------------------------------------------------------------------------------------------------------------------------------------------------------------------------------------------------------------------------------------------------------------------------------------------------------------------------------------------------------------------------------------------------|
| s | <b>Finances</b><br><br>Personal | <i>'And obviously, none of us get maternity leave from work. ... So financially, it's a huge source of stress, because - I'm lucky that my wife, who's also a doctor, works in the hospital system. She's put on and off about getting into general practice. Quite frankly, one of the things that puts her off is maternity leave and the thought of being completely unsupported by, you know, national government or any other organisation, if we were to take time off work.'</i> (GP1) |
| t | <b>Finances</b><br><br>Personal | <i>'And I think that in general practice we're lucky that we have somewhat well, we do have quite good control of our hours in that in that sense, particularly as a part time worker balancing a family at home.'</i> (GP19)                                                                                                                                                                                                                                                                 |

**Table 2.** This table contains further verbatim quotes (overflow table) in addition to those embedded in the text.

HCCC: Health Care Complaints Commission, Bulk billing: Medicare rebates cover practitioner charges (no out of pocket fees for patients).

PHNs: Primary Care Networks.

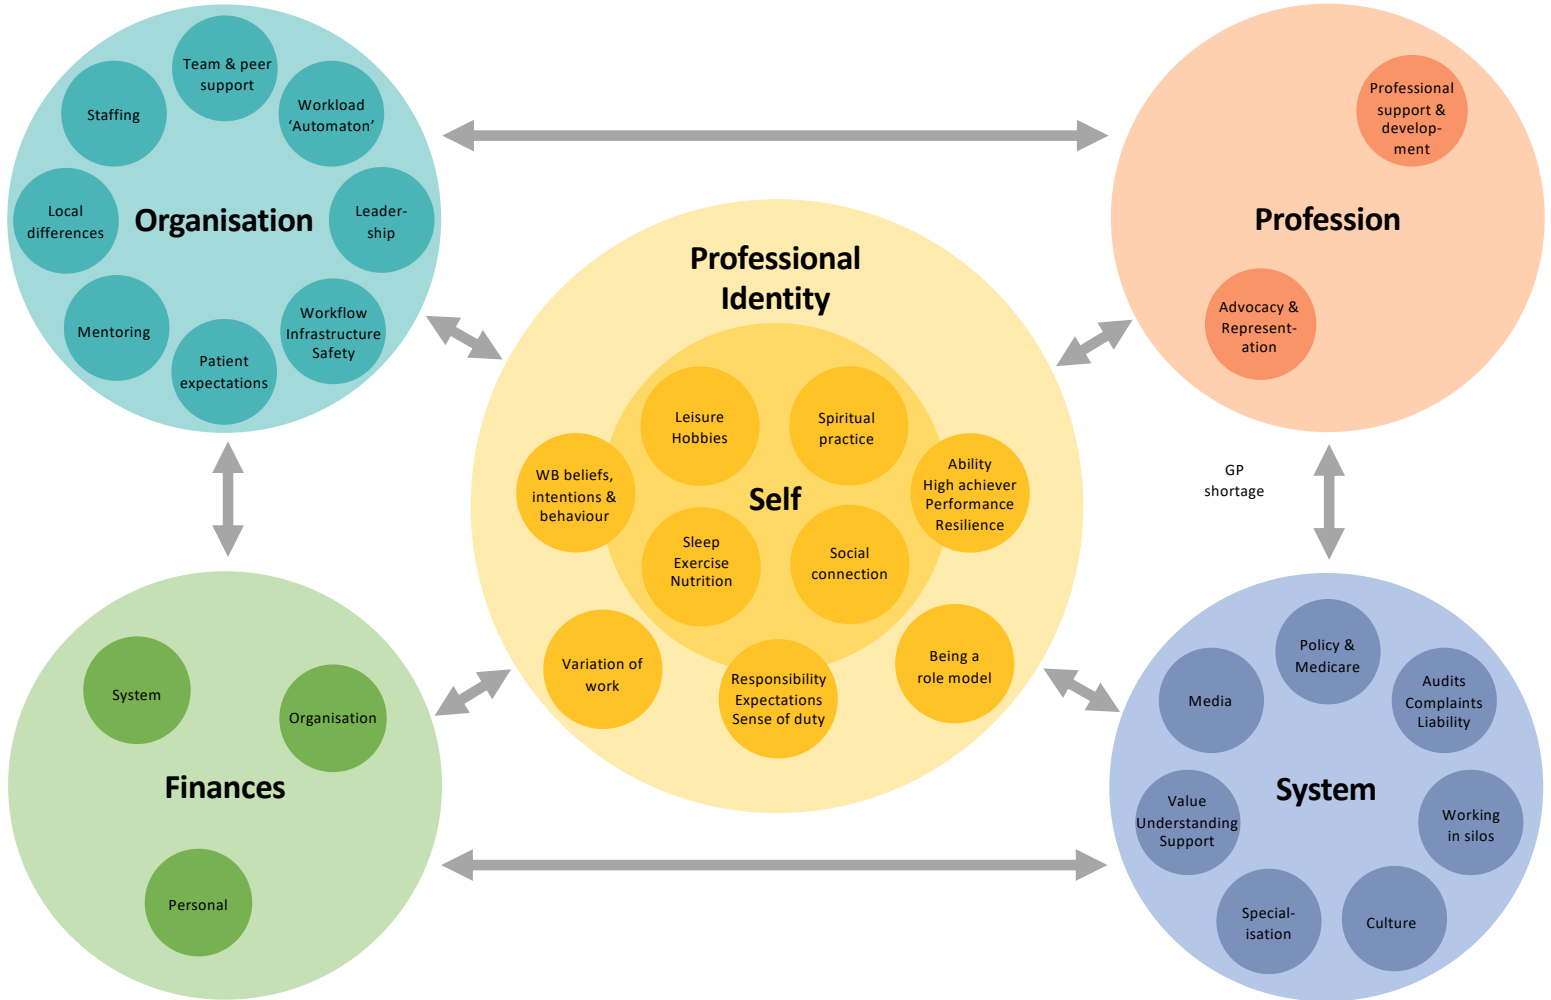

Fig. 1. Determinants of wellbeing in General Practitioners and their inter-connections.

1  
2  
3  
4  
5  
6  
7  
8  
9  
10  
11  
12  
13  
14  
15  
16  
17  
18  
19  
20  
21  
22  
23  
24  
25  
26  
27  
28  
29  
30  
31  
32  
33  
34  
35  
36  
37  
38  
39  
40  
41  
42  
43  
44  
45  
46

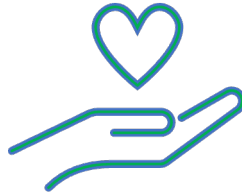

**Remuneration / rebate structure is a proxy for being valued (external driver)**

- ❖ Low remuneration, fees for item of service
- ❖ Exclusion from remuneration for 'specialist' services

This negatively impacts on GPs' perceived value, financial wellbeing and overall wellbeing.

**Fee structure drives patient behaviour (external driver)**

- ❖ Patients' unwillingness for co-payments
- ❖ Patients' expectations & regard for GPs providing free services

This negatively impacts on GPs' overall & financial wellbeing.

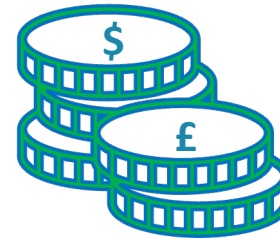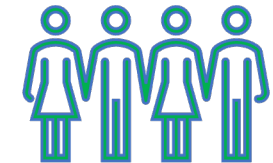

**Remuneration drives GP behaviour (internal driver)**



- ❖ High patient throughput
- ❖ Not taking breaks (working as an 'automaton')
- ❖ Working full-time (overall workload)

This creates stress over time, and negatively impacts on GPs' overall wellbeing.

Fig. 2. Mechanisms of the negative impact of finances on the wellbeing of General Practitioners.

©Diana Naehrig 2021 Infographic. PowerPoint Stock Images.

### Supplement 1. Qualitative Interview Guide “Wellbeing of General Practitioners”

Introduction script:

- Hello, and thank you for your willingness to participate in this interview about GP wellbeing.
- This interview will take approximately 30 minutes.
- With your consent, a recording of this interview will be made for transcription and analysis. The video component of the recording is not necessary for transcription or analysis and can be turned off if you prefer. If you do decide to turn the camera off, you will still be able to participate in the interview. **\*\*indicate the video button on the bottom toolbar\*\*** Is that okay? Please note that I will ask you again once the recording starts to confirm that you have consented to recording.
- Then I will start the recording NOW.
- Can I confirm that you have consented to video / audio recording this interview?
- Have you read the Participant Information Statement?
- Do you have any further questions?
- Do you consent to take part in this research project?
- Great thank you. Let’s start.

| Question                                                                                                                                                                                | Prompt                                                                                                                                                                                                                                                                                                                                                                                                          | Rationale                                                                                                                            |
|-----------------------------------------------------------------------------------------------------------------------------------------------------------------------------------------|-----------------------------------------------------------------------------------------------------------------------------------------------------------------------------------------------------------------------------------------------------------------------------------------------------------------------------------------------------------------------------------------------------------------|--------------------------------------------------------------------------------------------------------------------------------------|
| 1. I’ll just start by asking some general information about yourself:<br>a. Where do you work?<br>b. How many years have you worked as a GP?<br>c. Are you employed, contractor, owner? | <ul style="list-style-type: none"> <li>• Where is the GP practice located (metro, rural, remote)?</li> <li>• Have you worked in any other type of practice or location?</li> <li>• Have you specialised or received training in any specific additional areas?</li> </ul>                                                                                                                                       | Understand the different demographic groups of Australian GPs that have volunteered to participate in this study.                    |
| 2. How would you define wellbeing?                                                                                                                                                      | <ul style="list-style-type: none"> <li>• What does the concept ‘wellbeing’ mean to you?</li> <li>• Does wellbeing mean the same thing when you think of your own personal wellbeing compared to the wellbeing of your patients? Do you use the same ‘yardstick’?</li> </ul>                                                                                                                                     | Introduction. Lead into their understanding of the subject of wellbeing.<br><br>Explore their personal meaning of wellbeing.         |
| 3. What promotes wellbeing for you on a personal level?                                                                                                                                 | <ul style="list-style-type: none"> <li>• What do you generally do to keep yourself well?</li> <li>• Are there any resources, people, strategies you use to help maintain your wellbeing?</li> <li>• How important is improving your own wellbeing to you? Why is this so?</li> <li>• Are there any differences in how you maintain your own wellbeing at work, compared to when you are not at work?</li> </ul> | Explore how they stay well, what factors are involved to gain and maintain personal wellbeing.<br><br>How important is this to them. |

|                                                                                                                    |                                                                                                                                                                                                                                                                                                                                                                                                                                                                                  |                                                                                                         |
|--------------------------------------------------------------------------------------------------------------------|----------------------------------------------------------------------------------------------------------------------------------------------------------------------------------------------------------------------------------------------------------------------------------------------------------------------------------------------------------------------------------------------------------------------------------------------------------------------------------|---------------------------------------------------------------------------------------------------------|
| <p>4. What promotes your wellbeing on an organisational (GP practice) level?</p>                                   | <ul style="list-style-type: none"> <li>• How does the environment at work support your wellbeing?</li> <li>• Is there anything in your work environment that hinders or does not support your wellbeing? [If yes] What is that?</li> <li>• What needs to change?</li> <li>• What would need to happen in your immediate work surroundings for your wellbeing to be optimally supported?</li> </ul>                                                                               | <p>Explore what organisational factors need to be in place to gain and maintain personal wellbeing.</p> |
| <p>5. What promotes your wellbeing on a health systems level?</p>                                                  | <ul style="list-style-type: none"> <li>• Looking at the situation from a systemic perspective, what keeps you well?</li> <li>• If you could wave a magic wand, what would need to be in place (ie. how would you change the system for GPs)?</li> <li>• What support could policy makers, RACGP college, PHNs, Medicare, health insurances, etc) provide?</li> </ul>                                                                                                             | <p>Explore what systemic factors need to be in place to gain and maintain personal wellbeing.</p>       |
| <p>6. What is the impact of overall culture in health care on wellbeing?</p>                                       | <ul style="list-style-type: none"> <li>• How does the culture in health care influence the wellbeing of GPs?</li> <li>• How would you change the culture in health care to promote the wellbeing of GPs more generally?</li> </ul>                                                                                                                                                                                                                                               | <p>Explore cultural aspects to wellbeing.</p>                                                           |
| <p>7. Where do you access information and support to assist with your wellbeing?</p>                               | <ul style="list-style-type: none"> <li>• Do you access any information or services to assist in your wellbeing?</li> <li>• If yes, how useful is this?</li> <li>• If no, what would this information or service need to look like to be useful to you?</li> <li>• What sort of interventions (or support) do you think could be implemented to improve GPs wellbeing?             <ul style="list-style-type: none"> <li>○ How should these be delivered?</li> </ul> </li> </ul> | <p>Continuing personal and professional development.</p>                                                |
| <p>8. Is there anything else about wellbeing for GPs or your personal experience that you would like to share?</p> | <ul style="list-style-type: none"> <li>• How has COVID-19 impacted GP wellbeing?</li> <li>• Has COVID-19 influenced any support/interventions focused on GP wellbeing being provided?</li> </ul>                                                                                                                                                                                                                                                                                 | <p>Final question</p>                                                                                   |

## Supplement 2. Medicare terms explained.

All definitions are direct verbatim quotes from the sources in parenthesis. Accessed online on 16/09/2021.

### Medicare

'Medicare is Australia's universal health insurance scheme. It guarantees all Australians (and some overseas visitors) access to a wide range of health and hospital services at low or no cost.' (Australian Government, Department of Health, <https://www.health.gov.au/health-topics/medicare>)

'Medicare was introduced by the Commonwealth Government in 1984 to provide eligible Australian residents with affordable, accessible and high-quality healthcare. Medicare is based on the understanding that all Australians should contribute to the cost of healthcare according to their ability to pay. It is financed through progressive income taxation and an income-related Medicare levy.' (State Government Victoria, Department of Health, <https://www.racgp.org.au/download/Documents/e-health/Summary-of-new-MBS-item-numbers.pdf>)

### Medicare rebates and item numbers

'The Medicare Benefits Schedule (the MBS) is a list of the medical services for which the Australian Government will pay a Medicare rebate, to provide patients with financial assistance towards the costs of their medical services. Medicare rebates do not, and were never intended to, cover the full cost of medical services. The Government sets a Medicare Schedule Fee to determine the amount of the rebate that patients receive from the Government.' (Australian Medical Association, <https://www.ama.com.au/sites/default/files/documents/Guide%20for%20Patients%20on%20How%20the%20Health%20Care%20System%20Funds%20Medical%20Care.pdf>)

### Bulk billing

'Bulk billing means you don't have to pay for your medical service from a health professional. They [health professionals] bill us [Medicare] instead and they accept the Medicare benefit as full payment for the service. ... Not all health professionals bulk bill.' (Australian Government, Services Australia, <https://www.servicesaustralia.gov.au/individuals/subjects/how-claim-medicare-benefit/bulk-billing>)

## COREQ 32-item checklist

Authors: 1. D. Naehrig, 2. N. Glozier, 3. C. Klinner, 4. L. Acland, 5. B. Goodger, 6. I. Hickie, 7. A. Milton

| Number | Item                                       | Description                                                                                                                                                                                                                                                                                                                                                                                                                                                                                                                                                                                                                                                                               | Page No.                |
|--------|--------------------------------------------|-------------------------------------------------------------------------------------------------------------------------------------------------------------------------------------------------------------------------------------------------------------------------------------------------------------------------------------------------------------------------------------------------------------------------------------------------------------------------------------------------------------------------------------------------------------------------------------------------------------------------------------------------------------------------------------------|-------------------------|
| 1.     | Interviewer                                | Author 1 conducted all interviews.                                                                                                                                                                                                                                                                                                                                                                                                                                                                                                                                                                                                                                                        | Title page, and page 5  |
| 2.     | Researcher credentials                     | Author 1: Dr.med., FMH Radioonkologie, MSc Coach Psych.<br>Author 2: Prof of Psychological Medicine.<br>Author 3: Grad Cert QHR (Qualitative Health Research)<br>Author 4: BA BMed MHM MPH FRACGP.<br>Author 5: Dr<br>Author 6: AM MD FRANZCP FASSA FAHM<br>Author 7: BSc, MAppSc, PhD                                                                                                                                                                                                                                                                                                                                                                                                    | Title page.             |
| 3.     | Occupation                                 | Author 1 is a PhD candidate in psychological medicine, with experience in mixed methods research, as a clinician-researcher, coaching psychology, and as medical communication skills facilitator. Author 3 is a research assistant and experienced qualitative researcher. Author 4 is a general practitioner and head of clinical governance. Author 5 is a general practitioner. Authors 2 and 6 are psychiatrists both with extensive expertise in mixed methods research. Author 7 is a post-doctoral researcher in psychology, with extensive experience in qualitative research design, conduct and analysis.                                                                      | Title page, and page 5. |
| 4.     | Gender                                     | Authors 1, 3, 4 and 7 are female. Authors 2, 5 and 6 are male.                                                                                                                                                                                                                                                                                                                                                                                                                                                                                                                                                                                                                            | Page 5                  |
| 5.     | Experience and training                    | Authors are experienced and active researchers with expertise in qualitative, quantitative, and mixed methods approaches. Authors have researched and published in the broad topic area previously.                                                                                                                                                                                                                                                                                                                                                                                                                                                                                       | Page 5                  |
| 6.     | Relationship established                   | Participants only had direct contact with author 1. GPs interested in participating in the research contacted author 1 via phone, text, or email. Prior to interviews, the participants had the opportunity to review the participant information and consent forms, and discuss any questions, before giving consent. After the interview there was one brief follow-up and thank you email sent out. Author 1's interest in, and perceived importance of the topic of GP wellbeing may have assisted in establishing a relationship built on trust and mutual understanding. Similarly, GPs who are particularly interested in the subject of wellbeing may have chosen to participate. | Page 5                  |
| 7.     | Participants' knowledge of the interviewer | Author 1 who conducted all interviews had no previous professional or personal relationship with any of the participants. Co-authors only reviewed de-identified transcripts thus had no personal relationship with, or knowledge of participants. Participants were informed about who the involved researchers are in the Participant Information Statement (PIS).                                                                                                                                                                                                                                                                                                                      | Page 5                  |
| 8.     | Interviewer characteristics                | The interviewer is a PhD candidate, with a background in medicine and psychology. Author 1 chose to pursue the topic of GP wellbeing, because of perceived importance of the subject matter, and a personal belief that this is crucial in providing sustainable primary care to the population. As such she is aware of potential bias particularly in favour of GPs and their experience.                                                                                                                                                                                                                                                                                               | Page 5                  |
| 9.     | Methodological orientation and theory      | Thematic framework analysis with an inductive, data-driven approach was taken.                                                                                                                                                                                                                                                                                                                                                                                                                                                                                                                                                                                                            | Page 4                  |
| 10.    | Sampling                                   | Maximum variation sampling was applied, as we aimed for a diverse mix of participants across Australia.                                                                                                                                                                                                                                                                                                                                                                                                                                                                                                                                                                                   | Page 5                  |

|     |                                |                                                                                                                                                                                                                                                                                                 |                           |
|-----|--------------------------------|-------------------------------------------------------------------------------------------------------------------------------------------------------------------------------------------------------------------------------------------------------------------------------------------------|---------------------------|
| 11. | Method of approach             | We were supported by several organisations, who sent e-newsletters and communications to their members. Flyers, social media, and snowballing were also utilised.                                                                                                                               | Page 5                    |
| 12. | Sample size                    | N=20                                                                                                                                                                                                                                                                                            | Page 7                    |
| 13. | Non-participation              | Three GPs that were initially interested, subsequently did not partake in the interview. One stated lack of time, the others simply didn't respond to follow-up emails. All interviews that were commenced, were also completed.                                                                | NA                        |
| 14. | Setting of data collection     | Interviews were conducted online one-on-one via a University of Sydney password-protected Zoom meeting room.                                                                                                                                                                                    | Page 5                    |
| 15. | Presence of non-participants   | NA                                                                                                                                                                                                                                                                                              | NA                        |
| 16. | Description of sample          | A diverse group of GPs working clinically in Australia.                                                                                                                                                                                                                                         | Page 5                    |
| 17. | Interview guide                | Interviews were semi-structured, and included questions about GPs' own wellbeing.                                                                                                                                                                                                               | Page 6                    |
| 18. | Repeat interviews              | NA                                                                                                                                                                                                                                                                                              | NA                        |
| 19. | Audio/visual recording         | Interviews were recorded via Zoom, either on audio, or audio and video setting, as per the preference of the GP. Only audio-recordings were saved.                                                                                                                                              | Page 6                    |
| 20. | Field notes                    | Notes were made for analysis and were updated during researcher discussions to inform the writing of the manuscript.                                                                                                                                                                            | N/A                       |
| 21. | Duration                       | Interviews ranged from 20 to 43 minutes (mean 32 minutes duration).                                                                                                                                                                                                                             | Page 7                    |
| 22. | Data saturation                | Interviews were continued until data saturation was achieved. Data saturation was discussed and agreed upon in a team of 2 researchers (author 1 and 3), in consultation with author 7.                                                                                                         | Page 6                    |
| 23. | Transcripts returned           | Transcripts were not returned to participants.                                                                                                                                                                                                                                                  | N/A                       |
| 24. | Number of data coders          | Data was coded by authors 1 and 3.                                                                                                                                                                                                                                                              | Page 6                    |
| 25. | Description of the coding tree | Codes, themes, and subthemes were iteratively refined and developed during regular research team meetings between authors 1 and 3, and were triangulated with authors 2 and 7. Descriptions of the themes, subthemes and codes were developed and captured in a codebook (or coding framework). | Page 6                    |
| 26. | Derivation of themes           | Themes and subthemes were derived from the data.                                                                                                                                                                                                                                                | Page 6, 7                 |
| 27. | Software                       | Microsoft Word and NVivo 12.1.0 were used to manage the data.                                                                                                                                                                                                                                   | Page 6                    |
| 28. | Participant checking           | Participant checking was not applied.                                                                                                                                                                                                                                                           | NA                        |
| 29. | Quotations presented           | Participant quotations were used to exemplify (or illustrate) the finding. Quotations are identified with GP participant numbers, only to maintain anonymity.                                                                                                                                   | Pages 7-14, Table 2.      |
| 30. | Data and findings consistent   | Data and findings are consistent throughout.                                                                                                                                                                                                                                                    | Page 7-19                 |
| 31. | Clarity of major themes        | Themes are clearly described and presented in the manuscript and figure 1.                                                                                                                                                                                                                      | Pages 7,8, and figure 1.  |
| 32. | Clarity of minor themes        | Subthemes are clarified in detail, and their interconnectedness described.                                                                                                                                                                                                                      | Pages 7-14, and figure 1. |



1  
2  
3  
4  
5  
6  
7  
8  
9  
10  
11  
12  
13  
14  
15  
16  
17  
18  
19  
20  
21  
22  
23  
24  
25  
26  
27  
28  
29  
30  
31  
32  
33  
34  
35  
36  
37  
38  
39  
40  
41  
42  
43  
44  
45  
46  
47  
48  
49  
50  
51  
52  
53  
54  
55  
56  
57  
58  
59  
60

For peer review only

# BMJ Open

## Determinants of wellbeing and their interconnections in Australian general practitioners—a qualitative study

|                                 |                                                                                                                                                                                                                                                                                                                                                                                                                                                                                                                                                                                                                                                          |
|---------------------------------|----------------------------------------------------------------------------------------------------------------------------------------------------------------------------------------------------------------------------------------------------------------------------------------------------------------------------------------------------------------------------------------------------------------------------------------------------------------------------------------------------------------------------------------------------------------------------------------------------------------------------------------------------------|
| Journal:                        | <i>BMJ Open</i>                                                                                                                                                                                                                                                                                                                                                                                                                                                                                                                                                                                                                                          |
| Manuscript ID                   | bmjopen-2021-058616.R2                                                                                                                                                                                                                                                                                                                                                                                                                                                                                                                                                                                                                                   |
| Article Type:                   | Original research                                                                                                                                                                                                                                                                                                                                                                                                                                                                                                                                                                                                                                        |
| Date Submitted by the Author:   | 08-Mar-2022                                                                                                                                                                                                                                                                                                                                                                                                                                                                                                                                                                                                                                              |
| Complete List of Authors:       | Naehrig, Diana; The University of Sydney Faculty of Medicine and Health, Central Clinical School; The University of Sydney Faculty of Medicine and Health, Brain and Mind Centre<br>Glozier, Nick; The University of Sydney Faculty of Medicine and Health, Central Clinical School<br>Klinner, Christiane; The University of Sydney Faculty of Medicine and Health<br>Acland, Louise; ForHealth<br>Goodger, Brendan; Central and Eastern Sydney PHN<br>Hickie, Ian; The University of Sydney Faculty of Medicine and Health, Brain and Mind Centre<br>Milton, Alyssa ; The University of Sydney Faculty of Medicine and Health, Central Clinical School |
| <b>Primary Subject Heading</b>: | General practice / Family practice                                                                                                                                                                                                                                                                                                                                                                                                                                                                                                                                                                                                                       |
| Secondary Subject Heading:      | General practice / Family practice                                                                                                                                                                                                                                                                                                                                                                                                                                                                                                                                                                                                                       |
| Keywords:                       | GENERAL MEDICINE (see Internal Medicine), MENTAL HEALTH, OCCUPATIONAL & INDUSTRIAL MEDICINE, PRIMARY CARE, PUBLIC HEALTH                                                                                                                                                                                                                                                                                                                                                                                                                                                                                                                                 |
|                                 |                                                                                                                                                                                                                                                                                                                                                                                                                                                                                                                                                                                                                                                          |

SCHOLARONE™  
Manuscripts



I, the Submitting Author has the right to grant and does grant on behalf of all authors of the Work (as defined in the below author licence), an exclusive licence and/or a non-exclusive licence for contributions from authors who are: i) UK Crown employees; ii) where BMJ has agreed a CC-BY licence shall apply, and/or iii) in accordance with the terms applicable for US Federal Government officers or employees acting as part of their official duties; on a worldwide, perpetual, irrevocable, royalty-free basis to BMJ Publishing Group Ltd ("BMJ") its licensees and where the relevant Journal is co-owned by BMJ to the co-owners of the Journal, to publish the Work in this journal and any other BMJ products and to exploit all rights, as set out in our [licence](#).

The Submitting Author accepts and understands that any supply made under these terms is made by BMJ to the Submitting Author unless you are acting as an employee on behalf of your employer or a postgraduate student of an affiliated institution which is paying any applicable article publishing charge ("APC") for Open Access articles. Where the Submitting Author wishes to make the Work available on an Open Access basis (and intends to pay the relevant APC), the terms of reuse of such Open Access shall be governed by a Creative Commons licence – details of these licences and which [Creative Commons](#) licence will apply to this Work are set out in our licence referred to above.

Other than as permitted in any relevant BMJ Author's Self Archiving Policies, I confirm this Work has not been accepted for publication elsewhere, is not being considered for publication elsewhere and does not duplicate material already published. I confirm all authors consent to publication of this Work and authorise the granting of this licence.

## TITLE PAGE

|                       |                                                                                                                                                                                                                                                                                                                                                                                                                                                                                                                                                                                                                                                                                                                                                                                                                                                                                                                                                                                                                                                                                                                                                                                                                                                                                                                                                                                                                                                                                                                                                                                                                                                                                                                                                                                                                                                                                                                                                                                                                                                                                                                                                                                                                                                                                                                                                                                                                       |
|-----------------------|-----------------------------------------------------------------------------------------------------------------------------------------------------------------------------------------------------------------------------------------------------------------------------------------------------------------------------------------------------------------------------------------------------------------------------------------------------------------------------------------------------------------------------------------------------------------------------------------------------------------------------------------------------------------------------------------------------------------------------------------------------------------------------------------------------------------------------------------------------------------------------------------------------------------------------------------------------------------------------------------------------------------------------------------------------------------------------------------------------------------------------------------------------------------------------------------------------------------------------------------------------------------------------------------------------------------------------------------------------------------------------------------------------------------------------------------------------------------------------------------------------------------------------------------------------------------------------------------------------------------------------------------------------------------------------------------------------------------------------------------------------------------------------------------------------------------------------------------------------------------------------------------------------------------------------------------------------------------------------------------------------------------------------------------------------------------------------------------------------------------------------------------------------------------------------------------------------------------------------------------------------------------------------------------------------------------------------------------------------------------------------------------------------------------------|
| Title                 | <b>Determinants of wellbeing and their interconnections in Australian general practitioners—a qualitative study</b>                                                                                                                                                                                                                                                                                                                                                                                                                                                                                                                                                                                                                                                                                                                                                                                                                                                                                                                                                                                                                                                                                                                                                                                                                                                                                                                                                                                                                                                                                                                                                                                                                                                                                                                                                                                                                                                                                                                                                                                                                                                                                                                                                                                                                                                                                                   |
| Authors               | <p>Diana Naehrig, ORCID (0000-0002-1162-4092),<br/>Dr.med., FMH Radioonkologie, MSc Coach Psych,<br/>PhD candidate, The University of Sydney, Faculty of Medicine and Health,<br/>Level 5, Professor Marie Bashir Centre, 67-73 Missenden Road,<br/>Camperdown, NSW 2050, Australia, <a href="mailto:dnae2050@uni.sydney.edu.au">dnae2050@uni.sydney.edu.au</a>;</p> <p>Nick Glozier, ORCID (0000-0002-0476-9146),<br/>Professor of Psychological Medicine, The University of Sydney, Faculty of<br/>Medicine and Health, Central Clinical School, Level 5, Professor Marie<br/>Bashir Centre, 67-73 Missenden Road, Camperdown, NSW 2050,<br/>Australia, <a href="mailto:nick.glozier@sydney.edu.au">nick.glozier@sydney.edu.au</a></p> <p>Christiane Klinner, ORCID (0000-0001-9313-6799),<br/>Qualitative researcher, The University of Sydney, Faculty of Medicine and<br/>Health, Level 5, Professor Marie Bashir Centre, 67-73 Missenden Road,<br/>Camperdown, NSW 2050, Australia, <a href="mailto:Christiane.Klinner@sydney.edu.au">Christiane.Klinner@sydney.edu.au</a>;</p> <p>Louise Acland, ORCID (0000-0003-0417-6989), BA BMed MHM MPH<br/>FRACGP, General Practitioner, ForHealth, 316 Charlestown Rd,<br/>Charlestown, and Chair, RACGP Committee Standards for general practice<br/><a href="mailto:louiseacland@gmail.com">louiseacland@gmail.com</a></p> <p>Brendan Goodger, Dr,<br/>General Manager Primary Care Improvement, Central and Eastern Sydney<br/>PHN, Tower A, Level 5, 201 Coward St, Mascot NSW 2020, Australia,<br/><a href="mailto:b.goodger@cesphn.com.au">b.goodger@cesphn.com.au</a>;</p> <p>Ian Hickie, ORCID (0000-0001-8832-9895), AM MD FRANZCP FASSA<br/>FAHM<br/>Co-Director, Health and Policy and Professor of Psychiatry, NHMRC<br/>Senior Principal Research Fellow, The University of Sydney, Faculty of<br/>Medicine and Health, Brain and Mind Centre, Level 4, Building F, 94<br/>Mallett Street, Camperdown, NSW 2050, Australia, <a href="mailto:ian.hickie@sydney.edu.au">ian.hickie@sydney.edu.au</a>;</p> <p>Alyssa Milton, ORCID (0000-0002-4326-0123), BSc, MAppSc, PhD<br/>Post-doctorate researcher, The University of Sydney, Faculty of Medicine<br/>and Health, Level 5, Professor Marie Bashir Centre, 67-73 Missenden<br/>Road, Camperdown, NSW 2050, Australia, <a href="mailto:Alyssa.Milton@sydney.edu.au">Alyssa.Milton@sydney.edu.au</a>;</p> |
| Corresponding author  | Diana Naehrig, The University of Sydney, Faculty of Medicine and Health,<br>Level 5, Professor Marie Bashir Centre, 67-73 Missenden Road,<br>Camperdown, NSW 2050, Australia, <a href="mailto:dnae2050@uni.sydney.edu.au">dnae2050@uni.sydney.edu.au</a>                                                                                                                                                                                                                                                                                                                                                                                                                                                                                                                                                                                                                                                                                                                                                                                                                                                                                                                                                                                                                                                                                                                                                                                                                                                                                                                                                                                                                                                                                                                                                                                                                                                                                                                                                                                                                                                                                                                                                                                                                                                                                                                                                              |
| Word count manuscript | 4572/4000                                                                                                                                                                                                                                                                                                                                                                                                                                                                                                                                                                                                                                                                                                                                                                                                                                                                                                                                                                                                                                                                                                                                                                                                                                                                                                                                                                                                                                                                                                                                                                                                                                                                                                                                                                                                                                                                                                                                                                                                                                                                                                                                                                                                                                                                                                                                                                                                             |

## ABSTRACT

### Objectives

The wellbeing of doctors is recognised as a major priority in health care, yet there is little research on how General Practitioners (GPs) keep well. We aimed to address this gap by applying a positive psychology lens, and exploring what determines GPs wellbeing, as opposed to burnout and mental ill health, in Australia.

### Design

Semi-structured qualitative interviews.

From March to September 2021, we interviewed GPs working in numerous settings, using snowball and purposive sampling to expand recruitment across Australia. 20 GPs participated individually via Zoom. A semi-structured interview-guide provided a framework to explore wellbeing from a personal, organisational, and systemic perspective. Recordings were transcribed verbatim, and inductive thematic analysis was performed.

### Results

Eleven female and nine male GPs with diverse experience, from urban and rural settings were interviewed (mean 32 minutes). Determinants of wellbeing were underpinned by GPs' sense of identity. This was strongly influenced by GPs seeing themselves as a distinct but often undervalued profession working in small organisations within a broader health system. Both personal finances, and funding structures emerged as important moderators of the inter-connections between these themes. Enablers of wellbeing were mainly identified at a personal and practice level, whereas systemic determinants were consistently seen as barriers to wellbeing. A complex balancing act between all determinants of wellbeing was evidenced.

### Conclusions

GPs were able to identify targets for individual and practice level interventions to improve wellbeing, many of which have not been evaluated. However, few systemic aspects were suggested as being able to promote wellbeing, but rather seen as barriers, limiting how to develop systemic interventions to enhance wellbeing. Finances need to be a major consideration to prioritise, promote, and support GP wellbeing, and a sustainable primary care workforce.

### Keywords

Wellbeing, determinants, general practitioner, family practitioner, primary health care, qualitative research.

### *Ethics approval statement*

This study was approved by the University of Sydney Human Research and Ethics Committee (2020/822).

### *Funding source*

Dr Diana Naehrig is funded through the Raymond Seidler PhD scholarship.

This research was supported (partially or fully) by the Australian Government through the Australian Research Council's Centre of Excellence for Children and Families over the Life Course (Project ID CE200100025).

The funding sources did not have any influence on the design or conduct of this research.

## STRENGTHS AND LIMITATIONS OF THIS STUDY

### Strengths

- A positive framework—examining how GPs keep well and thrive—was deliberately selected to examine GPs' wellbeing, which complements literature on mitigating burnout.
- Qualitative inquiry assists in understanding complex interactions between different determinants of wellbeing.
- Our diverse sample includes GPs working in a wide range of clinical settings in Australia.

### Limitations

- Our results may not be generalisable to all GPs, particularly those working outside of the Australian context.
- Selection bias needs to be considered in any voluntary research participation.

## INTRODUCTION

Health care typically aims to improve patient care, population health and cost effectiveness (1, 2). The wellbeing of health care professionals has been recognised as a priority, and further key component of the wider goals for health care in the USA, and Canada (1-5). In Australia, the 'National medical workforce strategy' developed a joint vision to provide effective, universally accessible, and sustainable health care across the entire population (6), whereby doctor wellbeing, and insufficient generalist capacity, have been identified as top concerns (6, 7).

General practice is ideally placed to address health care goals by crucially providing cost-effective care to patients, and underpinning population health. However, demand for generalist services outweighs supply in many countries, including the UK, the USA, and Australia, with an even greater undersupply of Australian GPs forecast by 2030 (8-14). The additional strain of the pandemic (15) highlights the urgency of prioritising GP wellbeing.

1  
2  
3 Professional organisations are aware, and endeavouring to address this by offering support  
4 (i.e., Royal Australian College of General Practitioners (RACGP) programmes and resources  
5 (16, 17)), and funding research into GPs' health and wellbeing.  
6  
7  
8  
9

10 Doctors' health research is typically informed by the clinical model, and there is a substantial  
11 body of literature aiming to explore and mitigate burnout, distress, and mental ill health (18-  
12 25), and improve doctors' uptake of health services across different settings (26-30). There is  
13 comparatively little research—particularly qualitative—that deliberately applies a positive  
14 lens, and explores how GPs keep well and thrive. We aim to explore this gap by drawing on  
15 positive psychology to complement the clinical model. The field of positive psychology  
16 provides several theories, definitions and measures of wellbeing, and most are defined as  
17 multi-dimensional constructs (31). Diener's theory of subjective wellbeing comprises  
18 cognitive, often assessed as (life) satisfaction, and affective (emotional) components (32).  
19 Cognitive wellbeing is more stable over time than affective wellbeing, and is linked to factors  
20 such as status, life events, and income that may involve an appraisal of wellbeing over time  
21 (33-35). Ryff's 'psychological wellbeing' (36) includes six dimensions: positive relations  
22 with others, autonomy, environmental mastery, purpose in life, personal growth, and self-  
23 acceptance. Flourishing or PERMA, as construed by Seligman is a wellbeing theory  
24 described by positive emotion, engagement, relationships, meaning, and accomplishment  
25 (37).  
26  
27  
28  
29  
30  
31  
32  
33  
34  
35  
36  
37  
38

39 We conceptualise wellbeing, and mental ill health / burnout as distinct, albeit related  
40 constructs, which merit separate consideration. Other research groups have similarly  
41 recognised the importance of exploring wellbeing in its own right. For example, a UK group  
42 focused on 'psychological wellbeing', and 'mental wellbeing' in GPs (38, 39). Another group  
43 qualitatively explored 'wellbeing' in GPs as distinct from 'burnout' (40). We aimed to add to  
44 this burgeoning approach, and explore GPs wellbeing in the Australian context.  
45  
46  
47  
48  
49  
50

51 Overall, there is remarkably little evidence on how to effectively increase GP wellbeing, and  
52 related positive constructs (41). Our recent systematic review of both trials and policy  
53 changes exemplified the use of a wide variety of interventions, constructs, and metrics. (41).  
54 The review showed that these interventions had no consistent definition of wellbeing or its  
55 components, a lack of consensus on how to measure it (often with a scattergun set of  
56 measures), and few theoretical links between the intervention content and wellbeing target.  
57  
58  
59  
60

1  
2  
3 Interventions were typically aimed at the individual GP, involved mindfulness practice, and  
4 showed low to moderate effectiveness. Very few interventions targeted organisations, or  
5 health systems yet much of the discourse suggests interventions to improve wellbeing should  
6 be delivered at these levels. If this is the case, we also need to know what determinants of  
7 wellbeing such interventions should focus on enhancing.  
8  
9  
10  
11  
12  
13  
14

## 15 **OBJECTIVES**

16  
17 A robust and sustainable generalist workforce is important. In order to bolster the wellbeing  
18 of Australian GPs, and ultimately address the gap in the literature regarding effective  
19 wellbeing interventions for GPs as seen through a positive lens, we aimed to:  
20  
21

- 22 • apply a positive framework to explore GPs' wellbeing, and key, potentially modifiable  
23 factors that determine it.
- 24 • qualitatively analyse how these determinants are inter-connected, and what the underlying  
25 drivers are.  
26  
27  
28  
29

## 30 **METHODS**

### 31 *Qualitative approach and research design*

32 We applied a six-step qualitative thematic analysis (42-45), providing a flexible and  
33 accessible way of analysing qualitative data, enabling iterative exploration of patterns and  
34 relationships between different themes whilst ensuring research rigour. The six steps  
35 included: 1) familiarising with data; 2) generating initial codes; 3) searching for themes and  
36 subthemes; 4) reviewing themes; 5) refining, defining and naming themes; and 6) writing the  
37 report (45). We used an inductive data-driven (bottom-up), and a critical realist  
38 epistemological approach to our analysis (46). A COREQ (47) reporting checklist is  
39 provided.  
40  
41  
42  
43  
44  
45  
46  
47  
48  
49

### 50 *Researcher characteristics and reflexivity*

51 Our research team (four females and three males) consisted of a PhD candidate with  
52 background in medicine and coaching psychology (DN); two GPs, one (BG) a representative  
53 of a Primary Health Network (PHN), a GP led organisation responsible for the primary care  
54 of a large geographical location typically serving a few hundred thousand people, and a  
55 representative (LA) of a national private GP organisation; two psychiatrists (NG, IH); a  
56 psychologist/researcher (AM), and a researcher (CK) both with extensive qualitative  
57  
58  
59  
60



1  
2  
3 expertise. Collaborating with GPs within our research team enabled reflexivity across  
4 personal, professional, organisational and systemic experiences (48).  
5  
6  
7

### 8 *Context & sampling strategy*

9  
10 Recruitment was aimed at GPs, and GP registrars working clinically in Australia. We chose a  
11 maximum variation sampling approach (49, 50), and purposely engaged PHNs and a private  
12 GP organisation to announce our study in e-newsletters and communications. Furthermore,  
13 we utilised flyers, social media, and snowballing.  
14  
15  
16  
17

### 18 *Patient and Public involvement*

19 Patients and public were not involved in the design or conduct of this research project.  
20  
21  
22

### 23 *Ethical issues*

24 Participation was voluntary. All participants received a participant information sheet and  
25 provided consent prior to being interviewed. The University of Sydney HREC approved this  
26 study (2020/822).  
27  
28  
29  
30

### 31 *Data collection & management*

32 DN interviewed GPs one-on-one online in password protected Zoom conferencing rooms. A  
33 semi-structured topic guide (Supplement 1)—developed by the entire team—provided a  
34 framework, whilst allowing for further explorative questions. Interview topics included  
35 demographic information about participants, GPs' conceptualisation of wellbeing, factors  
36 promoting their wellbeing on a personal, organisational and systems level, the impact of  
37 culture in health care on wellbeing, accessing information and support to assist with their  
38 wellbeing, and the impacts of COVID-19 on their wellbeing. We planned 20 interviews with  
39 the potential for further interviews. After independent analysis of half the transcripts (DN,  
40 CK) no new codes or themes were identified (51). Interviews were continued to capture GPs  
41 from various geographical locations and experience levels. No additional themes emerged,  
42 meeting the criteria for thematic data saturation (52). We concluded at 20 participants as  
43 intended.  
44  
45  
46  
47  
48  
49  
50  
51  
52  
53

54 Interviews were audio-recorded, and securely managed on University of Sydney research  
55 servers. Verbatim transcripts were checked for accuracy against original recordings and de-  
56 identified by DN before analysis.  
57  
58  
59  
60

### *Data analysis*

Inductive thematic analysis (45) was facilitated by Nvivo12 software (53). DN, CK, AM, NG engaged in steps 1) to 3) as described above, based on three different, randomly selected transcripts that were allocated to each researcher. DN developed a preliminary codebook in consultation with the research team with themes and subthemes (step 4), and coded all transcripts using NVivo (53). CK independently reviewed all transcripts and double coded half of them. Inter-coder variability (54) ranged from  $k = 0.48$  to  $k = 0.99$  depending on the theme, providing the basis for further dialogue, reflexivity, and theme development (step 4 and 5). The codebook was iteratively refined throughout the process (DN, CK), and by triangulation with AM and NG (step 5); detailed descriptions of all codes were developed. For step 6, reporting of results, see below.

## **RESULTS**

From March to September 2021, we interviewed 20 GPs (mean duration of 32 minutes; range 20 - 43 minutes) with diverse experience levels, backgrounds, geographical, and work arrangements (Table 1). The interviews captured participants' conceptualisation of wellbeing; determinants of wellbeing; and strategies for wellbeing. Running through each was a current focus on COVID-19 impacts on GPs' wellbeing. Given the numerous definitions and metrics of wellbeing available we specifically did not provide these to the participants to let them generate their own conceptualisations. When asked GPs mostly equated wellbeing in a fairly concrete fashion with good physical health, mental health, happiness, and social connection, rather than some of the constructs e.g., achievement or engagement, in the literature. We then explored 'What promotes wellbeing for you on a personal, practice and systems level'? For determinants we discerned five themes, each with several subthemes. We charted these (Figure 1), and important interconnections were analysed. Strategies for wellbeing, and the COVID-19 specific influences on GP wellbeing are presented elsewhere.

### *Identity / Self*

Determinants of wellbeing were related to GPs' identity as a person, and their identity as a professional with many seeing themselves as 'wellbeing experts' especially for physical and mental aspects of wellbeing (Table 2a). Personal determinants included exercise, sleep,

1  
2  
3 nutrition, social and community connection, leisure activities, spiritual practice, and a 'sense  
4 of balance' overall (Table 2b) determined by participants beliefs, intentions, and behaviours.  
5 However, several participants stated not (always) heeding the wellbeing advice they gave  
6 their patients.  
7  
8  
9

10 *'...I've come to realise, actually, that what I'm imparting is good advice, but I need to*  
11 *follow it myself as well, because it does make sense, and it does improve my wellbeing*  
12 *as well. So, yeah, I think as GPs, I'm not sure we always do what's right for ourselves,*  
13 *you know, compared to what we impart to our patients.'* (GP15)  
14  
15  
16  
17

18 A strong professional identity—defined by a sense of pride, duty, responsibility, and high  
19 self-expectations —was ubiquitous (Table 2c). GPs also saw themselves as high achieving,  
20 able and resilient (Table 2d).  
21  
22  
23

24 *'From an identity point of view, ... being a doctor sometimes subsumes my identity,*  
25 *and it's an important part of my identity. And therefore, my contentment at work and*  
26 *my recognition as a doctor, and the satisfaction I get at work impact on my identity as*  
27 *a doctor...'* (GP14)  
28  
29  
30  
31

32 Choosing variation in the type of work carried out was another determinant of keeping well,  
33 through avoiding monotony and isolation, deliberately taking on different roles, and by  
34 temporarily relinquishing the burden of patient responsibility (i.e., having academic days,  
35 pursuing teaching and management, or assisting surgeons in theatre) (Table 2e).  
36  
37  
38  
39

40  
41 Aforementioned enablers of professional wellbeing were offset by a sense of being perceived  
42 as 'less than' a specialist by the system, the public, other doctors and often internalised by the  
43 GPs (Table 2f).  
44  
45  
46  
47

### 48 *Organisation*

49 For the organisational (practice) theme, the most important factor determining personal  
50 wellbeing was team and peer support. This included mostly informal debriefs with colleagues  
51 about challenging patients, medical management, staff, or personal issues, and was facilitated  
52 by organisational practices encompassing physical (e.g., having a common tea-room), social  
53 (e.g., protected breaks, and collegial social activities), and work domains (e.g., efficient  
54 practice management, routine workflow, and infrastructure).  
55  
56  
57  
58  
59  
60

1  
2  
3 *'Ahh, having a good bunch of people to work with, people who are working together*  
4 *in an environment that is safe, there is timetabling of patients, that we are able to*  
5 *have a tea break, toilet break, lunch break, and be able to respond to patients' needs*  
6 *as they arise, at the same time. That is important in a clinical setting.'* (GP3)  
7  
8  
9

10  
11 In contrast, GPs perceived working in competitive or negative team climates as highly  
12 detrimental to their wellbeing (Table 2g). This was more often expressed by participants in  
13 metropolitan practices, where practices reportedly skimp on tea-rooms, and doctors routinely  
14 work through lunch breaks due to financial strains related to significantly higher living  
15 expenses than in regional/rural areas (Table 2h). Effective practice leadership was helpful,  
16 whereas a lack of management understanding was detrimental.  
17  
18  
19  
20  
21  
22

23  
24 High workload and the pressure to see patients, sometimes coupled with insufficient staffing  
25 were frequently cited as barriers to wellbeing.  
26

27 *'...I feel that there is a real sausage factory sort of approach to it in Sydney. It's just*  
28 *bang, bang, bang, go, go, go.'* (GP12)  
29  
30  
31

32  
33 Having a mentor or supervisor who modelled how to maintain personal wellbeing was seen  
34 as important to learning how to prioritise personal wellbeing, particularly for GP registrars.  
35

36 *'...I think we need to be modelling. Because I think if people are going through the*  
37 *training and not experiencing any different, we shouldn't be surprised that they then*  
38 *become like 30, 40, 50-year-old GPs who are totally burnt out, and have no sense of*  
39 *what's actually important for their self-care.'* (GP12)  
40  
41  
42  
43

#### 44 *Profession*

45  
46 Determinants of wellbeing also originated from within the GP community, and their  
47 representative bodies.  
48

49 Several GP trainees, and educators described that training organisations, and the college  
50 representing rural practitioners offered tangible support. Examples included providing  
51 vouchers for gym memberships, facilitating discussion rounds on GP trainee days about  
52 keeping well, and the importance of self-care.  
53  
54

55 However, most GPs were either only vaguely aware of college support resources for  
56 wellbeing, or weren't interested.  
57  
58  
59  
60

1  
2  
3                   *'...The college or the PHNs think they're fabulous when they put on a wellbeing*  
4                   *weekend - and there's always a yoga class, you know, always a yoga class. I mean,*  
5                   *what does that mean? That's a token, and the wellbeing industry is – the corporate*  
6                   *life is all about talking about people's wellbeing, rather than providing real support.*  
7                   *Communication, engagement, concern, yeah, the same as we look after our patients.*  
8                   *And we don't get looked after by anyone.'* (GP9)  
9  
10  
11  
12  
13  
14

15 Many interviewees were dissatisfied with their professional college because they felt ill-  
16 represented, or even that the college was actively working against them. Consequently,  
17 several participants withdrew their college membership (Table 2i).  
18  
19  
20  
21

### 22 *System*

23 GPs' views on the Australian health system varied, yet nobody was able to identify support  
24 for wellbeing within the system.  
25  
26

27                   *'I'm not sure that there is anything from the system that supports my wellbeing...I*  
28                   *think it's up to you to look after yourself.'* (GP8)  
29  
30  
31

32 The subtheme most frequently emphasised by GPs during the interviews was a sense of not  
33 being valued, and a lack of appreciation, respect, and support.  
34  
35

36                   *'And I think the government just think we are a disorganised bunch, and who we can*  
37                   *just brush aside, and they will go the extra mile for their patients... Unless GPs get*  
38                   *organised, and more militant, then we're just going to be ground.'* (GP9)  
39  
40  
41

42 Participants expressed, that others' lack understanding of what a GP does on a daily basis,  
43 and the importance GPs play in the provision of population health (Table 2j).  
44  
45

46                   *'I think if more people had a concept of what general practice actually can do, and*  
47                   *what it does, there would be a lot more respect.'* (GP17)  
48  
49  
50

51 This lack of understanding was exemplified by limited GP consultation by the government  
52 concerning the Covid-19 response, and vaccination rollout (Table 2k).  
53  
54  
55

56 The fear of billing audits by Medicare (definition, Supplement 2), formal patient complaints  
57 (Table 2l & 2m), litigation threats, and bad media press compounded the lack of valuation.  
58  
59  
60

1  
2  
3 *'Well, I think the Medicare audits – although I've been lucky enough not to receive an*  
4 *audit letter yet – I think that has sent ... a whole load of fear through a lot of GPs*  
5 *who've tried to do the right thing'. (GP11)*  
6  
7  
8  
9

10 Over-specialisation (Table 2f) and GP shortages, as well as working in silos, rather than hand  
11 in hand (i.e., with other healthcare providers, between federal and state agencies) were  
12 mentioned by a small proportion of GPs.  
13  
14  
15

16  
17 Lastly, GPs frequently encountered unrealistic expectations from patients, including to  
18 receive services for free (Table 2n).  
19

20 *'...You see a number of patients that basically see you as the local Coles*  
21 *[supermarket]. "OK, doctor, I need my prescription, and I need my referral..." And*  
22 *you know, you are just a dispensing machine, an ATM. And it doesn't cost them*  
23 *anything because you are bulk billing.'* (GP14)  
24  
25  
26  
27  
28

### 29 *Finances*

30 Financial aspects were interlinked with all themes, and directly and indirectly determined  
31 wellbeing (Figure 2). Firstly, Medicare rebate structure that determined fee for services  
32 (Supplement 2) was closely tied to a sense of being valued, and personal wellbeing.  
33 Secondly, fee structure drove patient behaviour, which impacted on GPs overall and financial  
34 wellbeing. And thirdly, remuneration influenced GPs' behaviour. In our sample, several GPs  
35 responded to low rebate structure and high patient expectations with increasing patient  
36 throughput and foregoing work breaks, with implications for their wellbeing.  
37  
38  
39  
40  
41  
42  
43

44 Remuneration was perceived as a direct reflection of the value of a profession, a service, and  
45 a proxy for the outright value of a GP individually.  
46

47 *"...To me, so, I'm really sort of fed up [with the Medicare rebate] —disillusioned*  
48 *with—where we're at this stage, you know. And that, doesn't help our wellbeing*  
49 *because we don't—we feel undervalued. And the government has done nothing to*  
50 *really, you know, show any positive change in that respect. So definitely, and I don't*  
51 *really know the way out of that, because, you know, even if they were to increase the*  
52 *rebate a small amount, it still doesn't really reflect, you know, the amount of effort*  
53 *that we put into our patients, and the preventative side of things, I mean the amount of*  
54 *work we're doing to prevent hospitalisations and, all of that sort of thing.'* (GP15)  
55  
56  
57  
58  
59  
60

1  
2  
3  
4  
5 GPs voiced frustration with the cutbacks of billable Medicare items (Supplement 2) crucial to  
6 general practice, and the impact that had on their wellbeing (Table 2o).  
7  
8  
9

10 GPs described two factors that influenced their income: the volume of patients seen; and  
11 how, and what they billed. High patient throughput was sometimes driven by practice  
12 owners, but more often by personal financial pressures. Particularly, when the GP was the  
13 main breadwinner, lived in a metropolitan area, and/or the practice bulk billed only, there was  
14 significant pressure to see as many patients as possible. For example, one participant saw  
15 over one thousand bulk billed patients per month. Some GPs charged patient gap payments  
16 above the Medicare rebate, to reflect the value they attributed to their expertise and services  
17 (Table 2p). Whilst others reported a reluctance to privately bill their patients, or  
18 unwillingness to argue with patients over charging the gap between private and bulk billing  
19 (Table 2q).  
20  
21  
22  
23  
24  
25  
26

27 'Time is money' was a frequently reported concept, which directly impacted on some GPs'  
28 willingness to work less, and spend time on activities that they knew improved wellbeing,  
29 such as taking breaks, engaging in reflective practice, or attending peer review groups.  
30  
31

32 *'Fundamentally, I think the issue is ... the way that we're paid. And because we only*  
33 *generate billings when we're seeing patients it just sort of warps your whole view of,*  
34 *you know, what's worthwhile doing.'* (GP12)  
35  
36  
37  
38

39 According to one participant, GPs were ill-informed about Medicare's billing structure  
40 available to general practice (Table 2r). Indeed, several interviewees stated not being well  
41 versed or interested in financial management, so some deliberately engaged an accountant.  
42  
43  
44  
45

46 For GP registrars the financial pressures were compounded, as they are salaried, and  
47 remuneration is typically lower than for a fully qualified GP. Unpaid maternity leave was a  
48 relevant consideration (Table 2s), however, high autonomy and flexible working  
49 arrangements were specifically stated by women as key benefits of going into general  
50 practice.  
51  
52  
53

54 *'And I think that in general practice we're lucky that we have somewhat well, we do*  
55 *have quite good control of our hours in that in that sense, particularly as a part time*  
56 *worker balancing a family at home.'* (GP19)  
57  
58  
59  
60

1  
2  
3 Overall, what was most striking, was the tension and complex balancing act required between  
4 all determinants, at the centre of which stood the individual GP. We didn't observe a  
5 simplistic 'work-life balance', i.e., predicted on reducing hours and demands at 'work' to  
6 enable more 'life'. In this cohort much of GPs' sense of self—and wellbeing—lay in how  
7 they viewed themselves professionally, including how they designed their working life.  
8  
9  
10  
11  
12  
13  
14

## 15 **DISCUSSION**

### 16 *Summary*

17  
18  
19 Determinants of wellbeing were qualitatively explored in the interviews. We presented five  
20 themes each with subthemes: identity / self, organisation, profession, system, and finances.  
21 They are all are strongly interconnected, and each has several subthemes (see figure 1). GP  
22 wellbeing—or lack thereof—is a complex interplay between different determinants, and  
23 stakeholders. GPs provided examples of both enablers and barriers to their wellbeing. What  
24 clearly emerged is that enablers of wellbeing were mostly attributed to their personal lives,  
25 and for some, their immediate practices. A sense of pride in their abilities, performance, and  
26 resilience were key enablers of wellbeing. The main, underlying barriers—inadequate  
27 professional value and recognition—predominantly emanated from the system, and were  
28 underpinned by remuneration. GPs largely counter-balance barriers to wellbeing as best they  
29 can personally, and crucially, through informal peer support. When these mechanisms are  
30 exhausted or impossible, wellbeing quickly deteriorates. Furthermore, several GPs  
31 compensate low remuneration, inadequate professional recognition, and high patient demand  
32 with means detrimental to their wellbeing (i.e., by working harder, Figure 2).  
33  
34 It is noteworthy, that without guidance or provision of a definition of wellbeing, many GPs  
35 tended to focus on aspects of the system as barriers, rather than enablers of wellbeing. This  
36 was likely due to significant systemic pressures, GPs' perceived lack of agency regarding  
37 systemic and professional issues, and the frustration this causes. It may also be that GPs  
38 expect to look after themselves, or don't see how the system and professional bodies could  
39 bolster their wellbeing for example by co-designing organisational or policy interventions.  
40  
41 Seen through this lens, it becomes clear that resilience and wellbeing seminars designed for  
42 individual practitioners will not suffice, nor be embraced, especially when they are offered by  
43 the very organisations and systems that GPs deem responsible for hindering their wellbeing.  
44  
45  
46  
47  
48  
49  
50  
51  
52  
53  
54  
55  
56  
57  
58  
59  
60



### *Comparison with existing literature*

Although GPs defined wellbeing in fairly limited ways they described components of affective wellbeing (32), psychological wellbeing (36), and flourishing (37) when discussing what promotes wellbeing on a personal and practice level (i.e., social connections at work, autonomy and flexibility of work, sense of pride in their abilities). Interpreting the barriers to wellbeing is more complex. Whilst, for example, remuneration and valuation are determinants of how one might appraise cognitive wellbeing, these seemed viewed as something that could only detracted from wellbeing, i.e. as drivers of burnout? If we conceptualise wellbeing as a distinct construct—albeit related to burnout, then the answer is likely more nuanced than both being directly opposing sides of the same spectrum. Could improving remuneration or valuation actually improve wellbeing? Whilst some may see the answer as obvious (as life satisfaction continues to rise with income, albeit slowly at the income level of doctors (34)) this remains an empirical question.

We compared our findings with qualitative research on wellbeing, and related positive constructs such as satisfaction, and with selected quantitative research directly relevant to the Australian general practice landscape.

A UK group conducted focus groups with 25 GPs to identify factors that contribute to burnout and poor wellbeing, and strategies to improve both. Similar to our results, they identified the importance of team support, taking breaks, variety of, and control over their work, on an internal level; and wider governmental and public support, resources, and funding on an external level (40). British GP trainee focus groups (n=16) discussed the benefits of supportive professional relationships (i.e., supportive trainers), control over workload, and barriers to wellbeing of ‘not being valued’, and work-life imbalance (55). The European General Practice Research Network interviewed 183 GPs across eight countries, and described factors that promote job satisfaction: freedom to organise and choose their practice environment; professional education; and establishing strong patient-doctor relationships (56). Interestingly, patient-doctor relationships and professional education were not mentioned in our cohort. It was more a case of patient expectations being detrimental to wellbeing, and role modelling for registrars being useful. Female rural family doctors in the USA were interviewed regarding practice attributes that promote satisfaction, whereby supportive professional relationships were crucial (57). Our interviewees described the

1  
2  
3 importance of professional peer support, and particularly women appreciated the autonomy  
4 and flexibility to choose when, and where to work.

5  
6 In our interviews, stress of formal patient complaints and audits surfaced repeatedly.

7  
8 Similarly, a patients' complaints culture, and defensive practice were also described as  
9 stressors in focus groups exploring GP resilience and coping (58).

10  
11 A systematic review thematically analysed studies broadly focusing on positive factors  
12 related to general practice. They discerned general medical workforce themes, general  
13 practice specific themes, and professional/personal issues impacting on GP satisfaction in  
14 clinical practice (59). Subthemes included balance between income and workload; flexibility,  
15 variety, and freedom to choose work; responsibility, competency, recognition; positive self-  
16 image, personality, and values; and relationships with community, patients, carers, and other  
17 professionals (59). So overall, previous qualitative research in international contexts  
18 demonstrate alignment with our results, despite vastly different health care systems across  
19 countries.  
20  
21  
22  
23  
24  
25  
26  
27  
28

29 Our data also shows similarities with Australian quantitative data on life and job satisfaction,  
30 particularly regarding remuneration, value, and the strain of maintaining balance. The  
31 'Medicine in Australia – Balancing Employment and Life' (MABEL) surveys, were  
32 conducted from 2008 to 2018 with annual participant numbers of >3000 GPs (12, 60-67),  
33 furthermore the RACGP regularly commissions surveys, and reports (68, 69). GPs are most  
34 satisfied with variety and choosing how to work, least satisfied with remuneration and  
35 recognition, and about half of surveyed GPs report that maintaining work-life balance is a  
36 challenge (66, 68-70). Over several years, >40% of GPs have identified Medicare rebates as a  
37 top priority for policy action (68). Positive associations for job satisfaction in all doctor types  
38 include doctor characteristics (age close to retirement, Australian trained, good health); social  
39 characteristics (living with a partner, social interaction); and job characteristics (part-time  
40 work, opportunities for professional development, support networks, realistic patient  
41 expectations) (62, 63).  
42  
43  
44  
45  
46  
47  
48  
49  
50  
51  
52

### 53 *Strengths and limitations*

54 Strengths include the diversity of participants and their combined wealth of experience  
55 (Table 1), which allowed for a broad exploration and analysis of multiple determinants of GP  
56 wellbeing, and their interconnections. Sample sizes in qualitative research are generally small  
57 (n=20 in this study), however data saturation was reached.  
58  
59  
60

1  
2  
3 Limitations include selection bias often inherent in qualitative research with voluntary  
4 participation. We purposely only included GPs working in Australia for practicability  
5 reasons, and local relevance. These results may not equally apply to GPs working elsewhere,  
6 different factors may be present for GPs in other countries, particularly around funding  
7 structures and policy.  
8  
9

10  
11 There are many definitions and metrics of wellbeing in the literature (31, 71), which adds  
12 complexity to research in this space. For quantitative studies a wellbeing definition and  
13 dedicated measure can and should be selected (31, 41). We did not define wellbeing for our  
14 participants, but rather let them use their own conceptualisation, so as to not bias participants'  
15 answers.  
16  
17

18  
19 Mean interview duration was 32 minutes. Conducting longer interviews with busy GPs  
20 during a global pandemic was impossible. Ethnicity of participants was not recorded.  
21  
22  
23  
24

### 25 *Implications for research and/or practice*

26  
27 To prioritise Australian GPs' wellbeing, we need to understand the full breadth of  
28 determinants (enablers and barriers) of wellbeing, and how they interplay. Moving beyond  
29 individual wellbeing interventions, our data suggests why organisational, professional, and  
30 systemic structures need to be targeted. This will require advocacy, commitment, and  
31 funding. It will take careful planning by professional bodies, organisations and policy makers  
32 in collaboration with practitioners.  
33  
34

35  
36 In terms of research implications, wellbeing must be clearly defined, it must be distinguished  
37 from burnout both when it comes to designing interventions, and selecting metrics to assess  
38 their effectiveness.  
39  
40

41  
42 Strategies to advance wellbeing were discussed in the interviews, and are detailed in our  
43 subsequent publication.  
44  
45  
46  
47

## 48 **CONCLUSION**

49  
50 GPs balance complex and interconnected determinants of wellbeing, whereby value,  
51 remuneration, and peer support are crucial. Organisations, professional bodies, and policy  
52 makers have an untapped opportunity to enable GPs' wellbeing, with benefits to  
53 practitioners, their patients, the sustainability of the general practice workforce, and  
54 population health.  
55  
56  
57  
58  
59

## 60 **ACKNOWLEDGMENTS**

1  
2  
3 *Acknowledgements*  
4

5 First and foremost, we would like to thank all participants for sharing their time and insights.  
6 We would like to acknowledge the support extended by the Central and Eastern Sydney  
7 Primary Health Network, New South Wales; the Murray Primary Health Network, Victoria;  
8 and Healius Pty Ltd, Australia.  
9  
10  
11  
12

13 *Registration*  
14

15 Not applicable.  
16  
17

18 *Ethics approval statement*  
19

20 This study was approved by the University of Sydney Human Research and Ethics  
21 Committee (2020/822).  
22  
23  
24

25 *Funding statement*  
26

27 Dr Diana Naehrig was supported through the Raymond Seidler PhD scholarship. The funding  
28 source had no influence on the study design, collection, analysis or interpretation of data, the  
29 writing of the manuscript nor the decision to submit the article for publication. Award/Grant  
30 number is not applicable.  
31  
32  
33  
34

35  
36 This research was supported (partially or fully) by the Australian Government through the  
37 Australian Research Council's Centre of Excellence for Children and Families over the Life  
38 Course (Project ID CE200100025).  
39

40 The funding source did not have any influence on the design or conduct of this research.  
41  
42  
43  
44

45 *Competing interest statement*  
46

47 Beyond the Raymond Seidler PhD scholarship for DN, and support for NG, AM and CK  
48 through ARC's Centre of Excellence for Children and Families over the Life Course (Project  
49 ID CE200100025) there was no support from any organisation for the submitted work. Ian  
50 Hickie has competing interests to declare. All other authors have no competing interests to  
51 declare.  
52  
53  
54  
55

56  
57 *Contributorship statement*  
58  
59  
60

1  
2  
3 DNA is the guarantor and corresponding author and attests that DN, NG, CK, LA, BG, IH,  
4 AM meet authorship criteria and that no others meeting the criteria have been omitted. All  
5 authors critically revised and approved the final version of the manuscript to be published.  
6 Specifically, DN devised, and contributed to the study conception and design, acquisition of  
7 data, analysis of the data, interpretation of the data, drafted the manuscript, finalised the  
8 manuscript for reporting, and acts as corresponding author.  
9 NG contributed to the study conception and design, acquisition of data, analysis of the data,  
10 interpretation of the data, assisted in drafting the manuscript, and revising the final  
11 manuscript for reporting.  
12 CK contributed to analysis of the data, interpretation of the data, assisted in drafting the  
13 manuscript, and revising the final manuscript for reporting.  
14 LA contributed to the study conception and design, acquisition of data, interpretation of the  
15 data, assisted in drafting the manuscript, and revising the final manuscript for reporting.  
16 BG contributed to the study conception and design, acquisition of data, assisted in drafting  
17 the manuscript, and revising the final manuscript for reporting.  
18 IH contributed to the study conception and design, and revising the final manuscript for  
19 reporting.  
20 AM contributed to the study conception and design, acquisition of data, analysis of the data,  
21 interpretation of the data, assisted in drafting the manuscript, and revising the final  
22 manuscript for reporting.

#### *Transparency declaration*

23 Dr Diana Naehrig (the manuscript's guarantor) affirms that the manuscript is an honest,  
24 accurate, and transparent account of the study being reported.

#### *Data sharing statement*

25 We will consider sharing de-identified data upon reasonable request.

#### *Copyright*

26 Dr Diana Naehrig (corresponding author) has the right to grant on behalf of all authors and  
27 does grant on behalf of all authors, an exclusive licence on a worldwide basis to the BMJ  
28 Publishing Group Ltd to permit this article to be published in BMJ editions and any other  
29  
30  
31  
32  
33  
34  
35  
36  
37  
38  
39  
40  
41  
42  
43  
44  
45  
46  
47  
48  
49  
50  
51  
52  
53  
54  
55  
56  
57  
58  
59  
60

1  
2  
3 BMJPGGL products and sublicences such use and exploit all subsidiary rights, as set out in our  
4 licence.  
5  
6  
7  
8  
9

10 Figure 1. Determinants of wellbeing in General Practitioners and their interaction.  
11  
12

13 Figure 2. Mechanisms of the negative impact of finances on the wellbeing of General  
14 Practitioners.  
15  
16  
17  
18  
19  
20  
21  
22  
23  
24  
25  
26  
27  
28  
29  
30  
31  
32  
33  
34  
35  
36  
37  
38  
39  
40  
41  
42  
43  
44  
45  
46  
47  
48  
49  
50  
51  
52  
53  
54  
55  
56  
57  
58  
59  
60

For peer review only

## REFERENCES

1. Bodenheimer T, Sinsky C. From Triple to Quadruple Aim: Care of the Patient Requires Care of the Provider. *The Annals of Family Medicine*. 2014;12(6):573-6.
2. Spinelli WM. The phantom limb of the triple aim. *Mayo Clin Proc*. 2013;88(12):1356-7.
3. Wallace JE, Lemaire JB, Ghali WA. Physician wellness: a missing quality indicator. *The Lancet*. 2009;374(9702):1714-21.
4. Dunn PM, Arnetz BB, Christensen JF, Homer L. Meeting the imperative to improve physician well-being: Assessment of an innovative program. *J Gen Intern Med*. 2007;22(11):1544-52.
5. Luchterhand C, Rakel D, Haq C, Grant L, Byars-Winston A, Tyska S, et al. Creating a Culture of Mindfulness in Medicine. *Wmj*. 2015;114(3):105-9.
6. National Medical Workforce Strategy - Investing in our medical workforce to meet Australia's health needs. Australian Government. Department of Health.; 2021.
7. National Medical Workforce Strategy - Scoping Framework. Canberra: Australian Government. Department of Health.; 2019.
8. Addicott R, Maguire D, Honeyman M, Jabbal J. Workforce planning NHS Kings Fund. London: The King's Fund; 2015.
9. Nussbaum C, Massou E, Fisher R, Morciano M, Harmer R, Ford J. Inequalities in the distribution of the general practice workforce in England: a practice-level longitudinal analysis. *BJGP Open*. 2021.
10. Abel GA, Gomez-Cano M, Mustafee N, Smart A, Fletcher E, Salisbury C, et al. Workforce predictive risk modelling: development of a model to identify general practices at risk of a supply-demand imbalance. *BMJ Open*. 2020;10(1):e027934.
11. Sandhu D, Blythe A, Nayar V. How can medical schools create the general practice workforce? An international perspective. *MedEdPublish*. 2020;9(1).
12. Scott A. The evolution of the medical workforce. ANZ Health Sector Report: Melbourne Institute: Applied Economic and Social Research, The University of Melbourne; 2021 03/06/2021.
13. Scott A, Witt J, Humphreys J, Joyce C, Kalb G, Jeon SH, et al. Getting doctors into the bush: general practitioners' preferences for rural location. *Soc Sci Med*. 2013;96:33-44.
14. Deloitte. General Practitioner workforce report. Deloitte access economics; 2019.
15. Scott A. The impact of COVID-19 on GPs and non-GP specialists in private practice. The University of Melbourne.: Melbourne Institute of Applied Economic and Social Research.; 2020.
16. RACGP. The Royal Australian College of General Practitioners. Annual report 2019–20. . East Melbourne, Vic: RACGP; 2020.
17. RACGP. GP wellbeing Royal Australian College of General Practitioners Website. 2021 [Available from: <https://www.racgp.org.au/running-a-practice/practice-management/gp-wellbeing>].
18. Harvey SB, Epstein RM, Glozier N, Petrie K, Strudwick J, Gayed A, et al. Mental illness and suicide among physicians. *The Lancet*. 2021;398(10303):920-30.
19. Petrie K, Crawford J, Baker STE, Dean K, Robinson J, Veness BG, et al. Interventions to reduce symptoms of common mental disorders and suicidal ideation in physicians: a systematic review and meta-analysis. *The Lancet Psychiatry*. 2019;6(3):225-34.

- 1
  - 2
  - 3
  - 4
  - 5
  - 6
  - 7
  - 8
  - 9
  - 10
  - 11
  - 12
  - 13
  - 14
  - 15
  - 16
  - 17
  - 18
  - 19
  - 20
  - 21
  - 22
  - 23
  - 24
  - 25
  - 26
  - 27
  - 28
  - 29
  - 30
  - 31
  - 32
  - 33
  - 34
  - 35
  - 36
  - 37
  - 38
  - 39
  - 40
  - 41
  - 42
  - 43
  - 44
  - 45
  - 46
  - 47
  - 48
  - 49
  - 50
  - 51
  - 52
  - 53
  - 54
  - 55
  - 56
  - 57
  - 58
  - 59
  - 60
20. West C, Dyrbye L, Erwin P, Shanafelt T. Interventions to prevent and reduce physician burnout: a systematic review and meta-analysis. *The Lancet*. 2016;388(10057):2272-81.
21. West CP, Dyrbye LN, Shanafelt TD. Physician burnout: contributors, consequences and solutions. *Journal of Internal Medicine*. 2018;283(6):516-29.
22. Panagioti M, Geraghty K, Johnson J. How to prevent burnout in cardiologists? A review of the current evidence, gaps, and future directions. *Trends Cardiovasc Med*. 2018;28(1):1-7.
23. Panagioti M, Geraghty K, Johnson J, Zhou A, Panagopoulou E, Chew-Graham C, et al. Association Between Physician Burnout and Patient Safety, Professionalism, and Patient Satisfaction: A Systematic Review and Meta-analysis. *JAMA Intern Med*. 2018;178(10):1317-30.
24. Panagioti M, Panagopoulou E, Bower P, Lewith G, Kontopantelis E, Chew-Graham C, et al. Controlled interventions to reduce burnout in physicians: a systematic review and meta-analysis. *JAMA internal medicine*. 2017;177(2):195-205.
25. Riley R, Spiers J, Buszewicz M, Taylor AK, Thornton G, Chew-Graham CA. What are the sources of stress and distress for general practitioners working in England? A qualitative study. *BMJ Open*. 2018;8(1):e017361.
26. Kay M, Mitchell G, Clavarino A. What doctors want? A consultation method when the patient is a doctor. *Australian Journal of Primary Health*. 2010;16(1):52-9.
27. Kay M, Mitchell G, Clavarino A, Doust J. Doctors as patients: a systematic review of doctors' health access and the barriers they experience. *Br J Gen Pract*. 2008;58(552):501-8.
28. Kay M, Mitchell G, Clavarino A, Frank E. Developing a framework for understanding doctors' health access: a qualitative study of Australian GPs. *Aust J Prim Health*. 2012;18(2):158-65.
29. Clough B, March S, Leane S, Ireland M. What prevents doctors from seeking help for stress and burnout? A mixed-methods investigation among metropolitan and regional-based Australian doctors. *J Clin Psychol*. 2019;75(3):418-32.
30. Spiers J, Buszewicz M, Chew-Graham CA, Gerada C, Kessler D, Leggett N, et al. Barriers, facilitators, and survival strategies for GPs seeking treatment for distress: a qualitative study. *Br J Gen Pract*. 2017;67(663):e700-e8.
31. Linton MJ, Dieppe P, Medina-Lara A. Review of 99 self-report measures for assessing well-being in adults: exploring dimensions of well-being and developments over time. *BMJ Open*. 2016;6(7):e010641.
32. Diener E. Assessing subjective well-being: Progress and opportunities. *Social indicators research*. 1985;31(2):103-57.
33. Kettlewell N, Morris RW, Ho N, Cobb-Clark DA, Cripps S, Glozier N. The differential impact of major life events on cognitive and affective wellbeing. *SSM Popul Health*. 2020;10:100533.
34. Morris RW, Kettlewell N, Glozier N. The increasing cost of happiness. *SSM Popul Health*. 2021;16:100949.
35. Diener E, Ng W, Harter J, Arora R. Wealth and happiness across the world: material prosperity predicts life evaluation, whereas psychosocial prosperity predicts positive feeling. *J Pers Soc Psychol*. 2010;99(1):52-61.
36. Ryff CD. Happiness is Everything, or is it. Explorations, Meaning of Psychological Well-Being. *Journal of Personality and Social Psychology*. 1989;57(6):1069-81.



- 1
- 2
- 3 37. Seligman M. PERMA and the building blocks of well-being. *The Journal of Positive Psychology*. 2018;13(4):333-5.
- 4
- 5 38. Murray MA, Cardwell C, Donnelly M. GPs' mental wellbeing and psychological
- 6 resources: a cross-sectional survey. *Br J Gen Pract*. 2017;67(661):e547-e54.
- 7
- 8 39. Murray MA, Murray L, Donnelly M. Systematic review of interventions to improve
- 9 the psychological well-being of general practitioners. *BMC Family Practice*. 2016;17(1).
- 10
- 11 40. Hall LH, Johnson J, Heyhoe J, Watt I, Anderson K, O'Connor DB. Strategies to improve
- 12 general practitioner well-being: findings from a focus group study. *Fam Pract*.
- 13 2018;35(4):511-6.
- 14
- 15 41. Naehrig D, Schokman A, Hughes JK, Epstein R, Hickie IB, Glozier N. Effect of
- 16 interventions for the well-being, satisfaction and flourishing of general practitioners-a
- 17 systematic review. *BMJ Open*. 2021;11(8):e046599.
- 18
- 19 42. Braun V, Clarke V. What can "thematic analysis" offer health and wellbeing
- 20 researchers? *Int J Qual Stud Health Well-being*. 2014;9:26152.
- 21
- 22 43. Braun V, Clarke V. Using thematic analysis in psychology. *Qualitative Research in*
- 23 *Psychology*. 2006;3(2):77-101.
- 24
- 25 44. Clarke V, Braun V. Thematic analysis. *The Journal of Positive Psychology*.
- 26 2016;12(3):297-8.
- 27
- 28 45. Braun V, Clarke V. Thematic analysis. *APA handbook of research methods in*
- 29 *psychology, Vol 2: Research designs: Quantitative, qualitative, neuropsychological, and*
- 30 *biological*2012. p. 57-71.
- 31
- 32 46. Archer M, Bhaskar R, Collier A, Lawson T, (eds) NA. *Critical realism: Essential*
- 33 *readings*2013.
- 34
- 35 47. Tong A, Sainsbury P, Craig J. Consolidated criteria for reporting qualitative research
- 36 (COREQ): a 32-item checklist for interviews and focus groups. *International journal for*
- 37 *quality in health care*. 2007;19(6):349-57.
- 38
- 39 48. Barry C, Britten N, Barber N, Bradley C, F. S. Using reflexivity to optimize teamwork in
- 40 qualitative research. *Qual Health Res*. 1999(9):26-44.
- 41
- 42 49. Sandelowski M, Docherty S, Emden C. Focus on qualitative methods. Sample size in
- 43 qualitative research *Research in Nursing & Health*. 1995;18:179-83.
- 44
- 45 50. Rice PL, Ezy D. *Qualitative research methods: A health focus*. Melbourne, Australia.
- 46 1999.
- 47
- 48 51. Fusch PI, Ness LR. Are we there yet? Data saturation in qualitative research. *The*
- 49 *Qualitative Report*. 2015;20(9):1408-16.
- 50
- 51 52. Francis JJ, Johnston M, Robertson C, Glidewell L, Entwistle V, Eccles MP, et al. What
- 52 is an adequate sample size? Operationalising data saturation for theory-based interview
- 53 studies. *Psychology and health*. 2010;25(10):1229-45.
- 54
- 55 53. NVivo 12: QSR International Pty Ltd.; 2020 [Available from:
- 56 <https://www.qsrinternational.com/nvivo-qualitative-data-analysis-software/home>.
- 57
- 58 54. O'Connor C, Joffe H. Intercoder Reliability in Qualitative Research: Debates and
- 59 *Practical Guidelines*. *International Journal of Qualitative Methods*. 2020;19.
- 60
55. Ansell S, Read J, Bryce M. Challenges to well-being for general practice trainee
- doctors: a qualitative study of their experiences and coping strategies. *Postgrad Med J*.
- 2020;96(1136):325-30.
- 56
- 57 56. Le Floch B, Bastiaens H, Le Reste JY, Lingner H, Hoffman R, Czachowski S, et al. Which
- 58 positive factors give general practitioners job satisfaction and make general practice a
- 59
- 60

- 1  
2  
3 rewarding career? A European multicentric qualitative research by the European general  
4 practice research network. *BMC Fam Pract*. 2019;20(1):96.
- 5  
6 57. Hustedde C, Paladine H, Wendling A, Prasad R, Sola O, Bjorkman S, et al. Women in  
7 rural family medicine: a qualitative exploration of practice attributes that promote physician  
8 satisfaction. *Rural Remote Health*. 2018;18(2):4355.
- 9  
10 58. Cheshire A, Ridge D, Hughes J, Peters D, Panagioti M, Simon C, et al. Influences on GP  
11 coping and resilience: a qualitative study in primary care. *Br J Gen Pract*. 2017;67(659):e428-  
12 e36.
- 13  
14 59. Le Floch B, Bastiaens H, Le Reste JY, Lingner H, Hoffman RD, Czachowski S, et al.  
15 Which positive factors determine the GP satisfaction in clinical practice? A systematic  
16 literature review. *BMC Fam Pract*. 2016;17(1):133.
- 17  
18 60. Scott A. The impact of COVID-19 on GPs and non-GP specialists in private practice.  
19 Melbourne Institute: Applied Economic & Social Research, The University of Melbourne;  
20 2020.
- 21  
22 61. Scott A. General Practice Trends. The University of Melbourne, Melbourne.:  
23 Melbourne Institute: Applied Economic and Social Research; 2017.
- 24  
25 62. Joyce C, Wang WC. Job satisfaction among Australian doctors: the use of latent class  
26 analysis. *Journal of Health Services Research and Policy*. 2015;20(4):224-30.
- 27  
28 63. Joyce CM, Schurer S, Scott A, Humphreys J, Kalb G. Australian doctors' satisfaction  
29 with their work: results from the MABEL longitudinal survey of doctors. 2011.
- 30  
31 64. Joyce CM, Scott A, Jeon SH, Humphreys J, Kalb G, Witt J, et al. The "medicine in  
32 Australia: balancing employment and life (MABEL)" longitudinal survey--protocol and  
33 baseline data for a prospective cohort study of Australian doctors' workforce participation.  
34 *BMC Health Serv Res*. 2010;10:50.
- 35  
36 65. Rodwell J, Gulyas A. A taxonomy of primary health care practices: An avenue for  
37 informing management and policy implementation. *Australian Journal of Primary Health*.  
38 2013;19(3):236-43.
- 39  
40 66. Shrestha D, Joyce CM. Aspects of work-life balance of Australian general  
41 practitioners: determinants and possible consequences. *Australian Journal of Primary  
42 Health*. 2011;17(1):40-7.
- 43  
44 67. *Medicine in Australia: Balancing Employment and Life*,  
45 Australia's national longitudinal survey of doctors: Melbourne Institute, University of  
46 Melbourne; 2021 [Available from: <https://melbourneinstitute.unimelb.edu.au/mabel/home>].
- 47  
48 68. RACGP. General Practice: Health of the Nation 2020. East Melbourne, Vic: The Royal  
49 Australian College of General Practitioners. ; 2020.
- 50  
51 69. RACGP GP Survey. Melbourne: EY Sweeney; 2020.
- 52  
53 70. McGrail MR, Humphreys JS, Scott A, Joyce CM, & Kalb G. Professional satisfaction in  
54 general practice: does it vary by size of community? *Medical Journal of Australia*.  
55 2010;193(2):94-8.
- 56  
57 71. Dodge R, Daly A, Huyton J, Sanders L. The challenge of defining wellbeing.  
58 *International Journal of Wellbeing*. 2012;2(3):222-35.
- 59  
60

**Table 1. Demographics of interviewed General Practitioners (GPs)**

| Demographic                | N=20                       | Sub demographic                                                                                                                                                                                                                                                                           |
|----------------------------|----------------------------|-------------------------------------------------------------------------------------------------------------------------------------------------------------------------------------------------------------------------------------------------------------------------------------------|
| Sex                        | 11<br>9                    | Women<br>Men                                                                                                                                                                                                                                                                              |
| Experience                 | 2<br>2<br>4<br>4<br>4<br>4 | GP registrars (trainees)<br>GPs with 1 - 5 years of experience as a fellow<br>GPs with 6 - 10 years of experience as a fellow<br>GPs with 11 - 20 years of experience as a fellow<br>GPs with 21 - 30 years of experience as a fellow<br>GPs with 31 - 40 years of experience as a fellow |
| Current Location           | 15<br>3<br>1<br>1          | NSW (11 metropolitan, 4 regional)<br>VIC (2 metropolitan, 1 rural)<br>QLD (metropolitan)<br>SA (metropolitan)                                                                                                                                                                             |
| Previous location AUS      | 9                          | GPs had previously worked in Australian locations that included regional, rural, and remote settings across different states (NSW, QLD, VIC, SA, WA, NT).                                                                                                                                 |
| Previous location overseas | 10                         | GPs trained and / or worked overseas (including the United Kingdom, New Zealand, the Middle East, the Indian Subcontinent, and Africa).                                                                                                                                                   |
| Special interests          | 18                         | GPs had special interests including one or several of the following: rural medicine, aboriginal health, mental health, women's health, parental care, paediatrics, skin, eye health, sports medicine, veteran's health, prison health.                                                    |
| Other professional roles   | 10                         | GPs held other professional roles, sometimes including several of the following: academic (research & education), GP training, corporate & management, policy, medico legal, RACGP, ACRRM, practice accreditation, Australian defence force.                                              |
| Work arrangement           | 2<br>3<br>15               | GP registrars were salaried.<br>GPs currently were partners / principals in a practice, and several more had been practice-owners at some point during their career.<br>GPs provided clinical work as contractors, or have mixed arrangements depending on their roles.                   |
| Billing                    | 4<br>1<br>4<br>2<br>9      | Practices bulk billed only.<br>Practice billed privately only.<br>Practices had mixed billing.<br>Practices had other mixed means of funding (i.e., government grants)<br>Interviewees did not discuss practice billing structure.                                                        |

**Table 1.** NSW: New South Wales, VIC: Victoria, QLD: Queensland, SA: South Australia, WA: Western Australia, NT: Northern Territory, AUS: Australia, RACGP: Royal Australian College of General Practice, ACRRM: Australian College of Rural and Remote Medicine, bulk billing: Medicare rebates cover practitioner charges (no out of pocket fees for patients).

**Table 2. Determinants of Wellbeing - Verbatim Quotes**

| Quote    | Themes<br>Subthemes                                                                                | Verbatim Data (participant code)                                                                                                                                                                                                                                                                                                                                                                                                                                                                                                                                                                 |
|----------|----------------------------------------------------------------------------------------------------|--------------------------------------------------------------------------------------------------------------------------------------------------------------------------------------------------------------------------------------------------------------------------------------------------------------------------------------------------------------------------------------------------------------------------------------------------------------------------------------------------------------------------------------------------------------------------------------------------|
| <b>a</b> | <b>Identity / Self</b><br><br>Wellbeing beliefs,<br>intentions & behaviour                         | <i>'...I think it's probably a case of the medical profession has lost control of wellbeing and it's now the domain of Instagram influencers. ... I think wellbeing as a principle is what we've been trying to do for years.'</i> (GP9)                                                                                                                                                                                                                                                                                                                                                         |
| <b>b</b> | <b>Identity / Self</b><br><br>Exercise, Nutrition<br><br>Social connection<br><br>Leisure, hobbies | <i>'So that's probably exercise, and eating healthy, and being with friends and family is probably what keeps me well. ... I suppose having your work / life in balance, and still being able to function at work at an optimal level, and still be able to maintain all your responsibilities outside of work, with family and recreation, I suppose. And being happy with both aspects of your life.'</i> (GP18)                                                                                                                                                                               |
| <b>c</b> | <b>Identity / Self</b><br><br>Responsibility,<br>Expectations,<br>Sense of duty                    | <i>'You know, you've just got to be professional. Doesn't matter how you're feeling, doesn't matter what's happening. Work is work. And, if you don't, bad things happen.'</i> (GP5)                                                                                                                                                                                                                                                                                                                                                                                                             |
| <b>d</b> | <b>Identity / Self</b><br><br>Ability, High achiever,<br>Performance, Resilience                   | <i>'I expect myself to be more resilient [than others]. And I expect myself to cope with hardships.'</i> (GP8)                                                                                                                                                                                                                                                                                                                                                                                                                                                                                   |
| <b>e</b> | <b>Identity / Self</b><br><br>Variation of work roles                                              | <i>'If I work five, six, seven days [per week] in a general practice it really starts to affect you mentally. So, mixing it up is a fantastic way of keeping sane.'</i> (GP5)                                                                                                                                                                                                                                                                                                                                                                                                                    |
| <b>f</b> | <b>System</b><br><br>Specialisation                                                                | <i>'The other things around the health system that I find very difficult and concerning, ... is the proliferation of sub-, sub-, super-specialists. ... That puts an incredible strain on you as a GP because now suddenly, like a GP is supposed to know everything. ... You know, you're a sub-doctor in everything, or you're less of a doctor in everything because here these super-specialists telling you about the micro-details of how you should manage this one. But it also creates this huge gap. You're the generalist, and the next step is to this super-specialist.'</i> (GP14) |
| <b>g</b> | <b>Organisation</b><br><br>Team & peer support                                                     | <i>'I think that's one of the most common causes of stress, depression, and mental illnesses in other practices, not having a good relationship with other GPs. ... Belittling the other GP, and telling the patients that the other GP isn't good enough, or things like that. Or going against the medical advice of the other GP, even though that may have been correct, you know, trying to win over the patient, things like that.'</i> (GP13)                                                                                                                                             |

|                                                                                                                                                                                                                                                                                                  |  |                                                                                                                                                                                                                                                                                                                                                                                                                                                                                                                                                                                                                                                                                                                                                                                                                                                                                                                                                                                                                                                                                                                                                                                                                                                                                                                                                                                |
|--------------------------------------------------------------------------------------------------------------------------------------------------------------------------------------------------------------------------------------------------------------------------------------------------|--|--------------------------------------------------------------------------------------------------------------------------------------------------------------------------------------------------------------------------------------------------------------------------------------------------------------------------------------------------------------------------------------------------------------------------------------------------------------------------------------------------------------------------------------------------------------------------------------------------------------------------------------------------------------------------------------------------------------------------------------------------------------------------------------------------------------------------------------------------------------------------------------------------------------------------------------------------------------------------------------------------------------------------------------------------------------------------------------------------------------------------------------------------------------------------------------------------------------------------------------------------------------------------------------------------------------------------------------------------------------------------------|
| <p>1<br/>2<br/>3<br/>4<br/>5<br/>6<br/>7<br/>8<br/>9<br/>10<br/>11<br/>12<br/>13<br/>14<br/>15<br/>16<br/>17<br/>18<br/>19<br/>20<br/>21<br/>22<br/>23<br/>24<br/>25<br/>26<br/>27<br/>28</p> <p><b>h</b></p> <p><b>Organisation</b></p> <p>Local differences</p> <p>Team &amp; peer support</p> |  | <p><i>'And I feel quite strongly that general practice, particularly in [a metro area], is in a really bad state in relation to the lack of collegial relationships that most GPs have. And I really sense that moving from [a regional area], you know I came from – I worked in two separate practices as a registrar, with huge, big tearooms. We'd all sit down for like a one-and-a-half-hour lunch, just chat, connect, all that stuff. And then, I came back to [a metro area], and started going to interviews, and I said to everybody, like, 'Where are your tearooms? Where do you guys have lunch?' And they said, 'Oh, I don't know. Well, we were going to put a tearoom in, but we decided that, you know, we couldn't really afford it. We just had to put another consulting room in'. Or others were like, 'Well, I think the doctors just eat at their own table.' And so, that I found really shocking. And I know that it's, it's just one thing. But I think that that really symbolizes just how much of a commodity that the general practitioner is seen as. You know, in most urban contexts... is you just come in, you sit at your table, you see the patients, and you go home. And I think that there's a huge cost to that. You know that you're, that you're not having those, you know, informal chats over morning or lunch.'</i> (GP12)</p> |
| <p>29<br/>30<br/>31<br/>32<br/>33</p> <p><b>i</b></p> <p><b>Profession</b></p> <p>Advocacy and representation</p>                                                                                                                                                                                |  | <p><i>'And I do find that the college is completely useless at sticking up for GPs. I refuse to join them. I find them very frustrating. They don't, in my opinion, act as a good voice for us. So, mostly I work around them.'</i> (GP6)</p>                                                                                                                                                                                                                                                                                                                                                                                                                                                                                                                                                                                                                                                                                                                                                                                                                                                                                                                                                                                                                                                                                                                                  |
| <p>34<br/>35<br/>36<br/>37<br/>38<br/>39</p> <p><b>j</b></p> <p><b>System</b></p> <p>Value, Understanding, Support</p>                                                                                                                                                                           |  | <p><i>'Maybe people who go into politics of general practice really have forgotten the basics. Yes, I think 'naïve' is the word. I don't think they have a great idea of the day to day.'</i> (GP10)</p>                                                                                                                                                                                                                                                                                                                                                                                                                                                                                                                                                                                                                                                                                                                                                                                                                                                                                                                                                                                                                                                                                                                                                                       |
| <p>40<br/>41<br/>42<br/>43<br/>44<br/>45<br/>46</p> <p><b>k</b></p> <p><b>System</b></p> <p>Value, Understanding, Support</p>                                                                                                                                                                    |  | <p><i>'...With the vaccination programme...we weren't regarded as frontline workers, and we did Covid testing. We treat people with respiratory illness. And so, that was kind of - I think that was a diminishing thing, really, apart from you know, not feeling protected.'</i> (GP16)</p>                                                                                                                                                                                                                                                                                                                                                                                                                                                                                                                                                                                                                                                                                                                                                                                                                                                                                                                                                                                                                                                                                  |
| <p>47<br/>48<br/>49<br/>50<br/>51<br/>52<br/>53<br/>54<br/>55<br/>56<br/>57<br/>58<br/>59<br/>60</p> <p><b>l</b></p> <p><b>System</b></p> <p>Audits, Complaints, Liability</p>                                                                                                                   |  | <p><i>'This complaint, and all the other ones I've had, and other people I've seen...</i></p> <p><i>There should be some sort of triage system [within the HCCC, Health Care Complaints Commission] where the crap is weeded out, to reduce the stress on GPs, and other doctors, and save time. And at the same time not discouraging complainants, but perhaps it could be dealt with at a lower level.</i> (GP20)</p>                                                                                                                                                                                                                                                                                                                                                                                                                                                                                                                                                                                                                                                                                                                                                                                                                                                                                                                                                       |

|   |                                                   |                                                                                                                                                                                                                                                                                                                                                                                                                                                                                                                                                                                                                                                                                                                                                                  |
|---|---------------------------------------------------|------------------------------------------------------------------------------------------------------------------------------------------------------------------------------------------------------------------------------------------------------------------------------------------------------------------------------------------------------------------------------------------------------------------------------------------------------------------------------------------------------------------------------------------------------------------------------------------------------------------------------------------------------------------------------------------------------------------------------------------------------------------|
| m | <b>System</b><br>Audits, Complaints,<br>Liability | <i>'The other thing that can affect you, is probably if you get a few patient complaints to HCCC and AHPRA, or to the board. That actually brings your morale down quite a lot. It's one of the easiest things to complain against a doctor. You know, we're all soft targets.'</i> (GP13).                                                                                                                                                                                                                                                                                                                                                                                                                                                                      |
| n | <b>System</b><br>Patient expectations             | <i>'Patients think that they can come in, and see you, and have a great amount of things dealt with. And if you deal with three of the sixteen things, they walk away feeling unhappy, even though they've booked 15 minutes [consultation].'</i> (GP20)                                                                                                                                                                                                                                                                                                                                                                                                                                                                                                         |
| o | <b>Finances</b><br>System                         | <i>'But the wellbeing that GPs achieve, is by their own measures, and they are to counteract the negative pressures that come from outside this [consult] room. So ... the forces that are negative, are Medicare, and the way GPs are treated. Like the telehealth items are just going to be cut... ECGs [electro-cardiograms], that item was just cut. Joint injections, they were just cut.'</i> (GP9)                                                                                                                                                                                                                                                                                                                                                       |
| p | <b>Finances</b><br>Organisation                   | <i>So, [we are] private billing ... with discretion, so that there will be some patients that, you know, we'll bulk bill. But generally - And, I always have that mindset that I'm not going to undervalue myself. Otherwise, yeah, you know, yeah... And I think my patients have appreciated, that I do that extra bit for them and, you know, and they appreciate what they get. So, but I still will get occasional patients who will try [to get bulk billing].'</i> (GP15)                                                                                                                                                                                                                                                                                 |
| q | <b>Finances</b><br>Organisation                   | <i>'One of the things I like about a bulk billing practice, and it's good, I think, for my wellbeing - I have worked at some practices that charge. I hated the stress at the end of every consult where someone would be saying, "Please, can you just bulk bill me"? or "I just can't pay this week". And honestly, it was a very stressful situation at the end of every consult...'</i> (GP2)                                                                                                                                                                                                                                                                                                                                                                |
| r | <b>Finances</b><br>Personal                       | <i>'Ahm, I think GPs themselves hinder themselves. ... I think doctors' knowledge and understanding of Medicare, or GPs', is often appalling. ... They claim wrongly, they act poorly, they spend the public money poorly, and they're scared of things they shouldn't be scared of, or conversely, they're not scared of things they should be scared of. I think it's GPs themselves, not Medicare. ... It is ridiculous, because if you're a bulk billing GP your entire income is based on understanding that system, how can you possibly derive your income without understanding it? ... There is tons of information, Medicare videos, tutorials, loads of stuff on there, regular webinars. GPs do not educate themselves, it's their fault.'</i> (GP4) |

|   |                                 |                                                                                                                                                                                                                                                                                                                                                                                                                                                                                               |
|---|---------------------------------|-----------------------------------------------------------------------------------------------------------------------------------------------------------------------------------------------------------------------------------------------------------------------------------------------------------------------------------------------------------------------------------------------------------------------------------------------------------------------------------------------|
| s | <b>Finances</b><br><br>Personal | <i>'And obviously, none of us get maternity leave from work. ... So financially, it's a huge source of stress, because - I'm lucky that my wife, who's also a doctor, works in the hospital system. She's put on and off about getting into general practice. Quite frankly, one of the things that puts her off is maternity leave and the thought of being completely unsupported by, you know, national government or any other organisation, if we were to take time off work.'</i> (GP1) |
|---|---------------------------------|-----------------------------------------------------------------------------------------------------------------------------------------------------------------------------------------------------------------------------------------------------------------------------------------------------------------------------------------------------------------------------------------------------------------------------------------------------------------------------------------------|

**Table 2.** This table contains further verbatim quotes (overflow table) in addition to those embedded in the text.

HCCC: Health Care Complaints Commission, Bulk billing: Medicare rebates cover practitioner charges (no out of pocket fees for patients).

PHNs: Primary Care Networks.

For peer review only

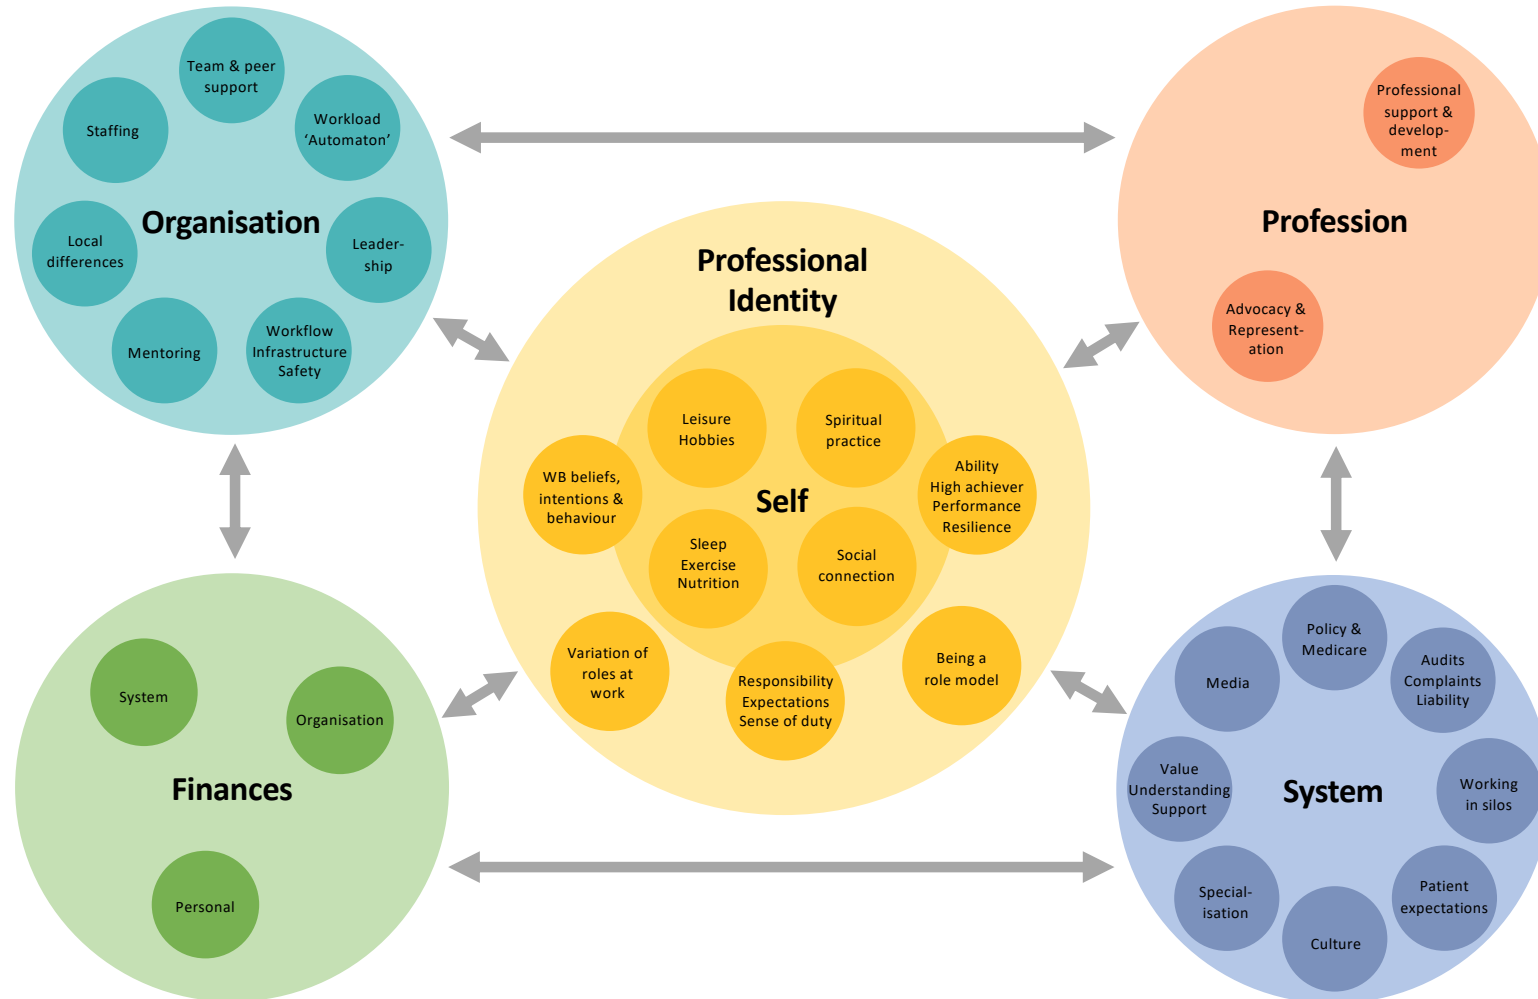

Fig. 1. Determinants of wellbeing in General Practitioners and their inter-connections.





**Remuneration / rebate structure is a proxy for being valued (external driver)**

- ❖ Low remuneration, fees for item of service
- ❖ Exclusion from remuneration for 'specialist' services

This negatively impacts on GPs' perceived value, financial wellbeing and overall wellbeing.

**Fee structure drives patient behaviour (external driver)**

- ❖ Patients' unwillingness for co-payments
- ❖ Patients' expectations & regard for GPs providing free services

This negatively impacts on GPs' overall & financial wellbeing.



**Remuneration drives GP behaviour (internal driver)**

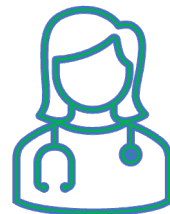

- ❖ High patient throughput
- ❖ Not taking breaks (working as an 'automaton')
- ❖ Working full-time (overall workload)

This creates stress over time, and negatively impacts on GPs' overall wellbeing.

Fig. 2. Mechanisms of the negative impact of finances on the wellbeing of General Practitioners.

©Diana Naehrig 2021 Infographic. PowerPoint Stock Images.

### Supplement 1. Qualitative Interview Guide “Wellbeing of General Practitioners”

Introduction script:

- Hello, and thank you for your willingness to participate in this interview about GP wellbeing.
- This interview will take approximately 30 minutes.
- With your consent, a recording of this interview will be made for transcription and analysis. The video component of the recording is not necessary for transcription or analysis and can be turned off if you prefer. If you do decide to turn the camera off, you will still be able to participate in the interview. **\*\*indicate the video button on the bottom toolbar\*\*** Is that okay? Please note that I will ask you again once the recording starts to confirm that you have consented to recording.
- Then I will start the recording NOW.
- Can I confirm that you have consented to video / audio recording this interview?
- Have you read the Participant Information Statement?
- Do you have any further questions?
- Do you consent to take part in this research project?
- Great thank you. Let’s start.

| Question                                                                                                                                                                                | Prompt                                                                                                                                                                                                                                                                                                                                                                                                          | Rationale                                                                                                                            |
|-----------------------------------------------------------------------------------------------------------------------------------------------------------------------------------------|-----------------------------------------------------------------------------------------------------------------------------------------------------------------------------------------------------------------------------------------------------------------------------------------------------------------------------------------------------------------------------------------------------------------|--------------------------------------------------------------------------------------------------------------------------------------|
| 1. I’ll just start by asking some general information about yourself:<br>a. Where do you work?<br>b. How many years have you worked as a GP?<br>c. Are you employed, contractor, owner? | <ul style="list-style-type: none"> <li>• Where is the GP practice located (metro, rural, remote)?</li> <li>• Have you worked in any other type of practice or location?</li> <li>• Have you specialised or received training in any specific additional areas?</li> </ul>                                                                                                                                       | Understand the different demographic groups of Australian GPs that have volunteered to participate in this study.                    |
| 2. How would you define wellbeing?                                                                                                                                                      | <ul style="list-style-type: none"> <li>• What does the concept ‘wellbeing’ mean to you?</li> <li>• Does wellbeing mean the same thing when you think of your own personal wellbeing compared to the wellbeing of your patients? Do you use the same ‘yardstick’?</li> </ul>                                                                                                                                     | Introduction. Lead into their understanding of the subject of wellbeing.<br><br>Explore their personal meaning of wellbeing.         |
| 3. What promotes wellbeing for you on a personal level?                                                                                                                                 | <ul style="list-style-type: none"> <li>• What do you generally do to keep yourself well?</li> <li>• Are there any resources, people, strategies you use to help maintain your wellbeing?</li> <li>• How important is improving your own wellbeing to you? Why is this so?</li> <li>• Are there any differences in how you maintain your own wellbeing at work, compared to when you are not at work?</li> </ul> | Explore how they stay well, what factors are involved to gain and maintain personal wellbeing.<br><br>How important is this to them. |

|                                                                                                                    |                                                                                                                                                                                                                                                                                                                                                                                                                                                                      |                                                                                                         |
|--------------------------------------------------------------------------------------------------------------------|----------------------------------------------------------------------------------------------------------------------------------------------------------------------------------------------------------------------------------------------------------------------------------------------------------------------------------------------------------------------------------------------------------------------------------------------------------------------|---------------------------------------------------------------------------------------------------------|
| <p>4. What promotes your wellbeing on an organisational (GP practice) level?</p>                                   | <ul style="list-style-type: none"> <li>• How does the environment at work support your wellbeing?</li> <li>• Is there anything in your work environment that hinders or does not support your wellbeing? [If yes] What is that?</li> <li>• What needs to change?</li> <li>• What would need to happen in your immediate work surroundings for your wellbeing to be optimally supported?</li> </ul>                                                                   | <p>Explore what organisational factors need to be in place to gain and maintain personal wellbeing.</p> |
| <p>5. What promotes your wellbeing on a health systems level?</p>                                                  | <ul style="list-style-type: none"> <li>• Looking at the situation from a systemic perspective, what keeps you well?</li> <li>• If you could wave a magic wand, what would need to be in place (ie. how would you change the system for GPs)?</li> <li>• What support could policy makers, RACGP college, PHNs, Medicare, health insurances, etc) provide?</li> </ul>                                                                                                 | <p>Explore what systemic factors need to be in place to gain and maintain personal wellbeing.</p>       |
| <p>6. What is the impact of overall culture in health care on wellbeing?</p>                                       | <ul style="list-style-type: none"> <li>• How does the culture in health care influence the wellbeing of GPs?</li> <li>• How would you change the culture in health care to promote the wellbeing of GPs more generally?</li> </ul>                                                                                                                                                                                                                                   | <p>Explore cultural aspects to wellbeing.</p>                                                           |
| <p>7. Where do you access information and support to assist with your wellbeing?</p>                               | <ul style="list-style-type: none"> <li>• Do you access any information or services to assist in your wellbeing?</li> <li>• If yes, how useful is this?</li> <li>• If no, what would this information or service need to look like to be useful to you?</li> <li>• What sort of interventions (or support) do you think could be implemented to improve GPs wellbeing? <ul style="list-style-type: none"> <li>○ How should these be delivered?</li> </ul> </li> </ul> | <p>Continuing personal and professional development.</p>                                                |
| <p>8. Is there anything else about wellbeing for GPs or your personal experience that you would like to share?</p> | <ul style="list-style-type: none"> <li>• How has COVID-19 impacted GP wellbeing?</li> <li>• Has COVID-19 influenced any support/interventions focused on GP wellbeing being provided?</li> </ul>                                                                                                                                                                                                                                                                     | <p>Final question</p>                                                                                   |

## Supplement 2. Medicare terms explained.

All definitions are direct verbatim quotes from the sources in parenthesis. Accessed online on 16/09/2021.

### Medicare

'Medicare is Australia's universal health insurance scheme. It guarantees all Australians (and some overseas visitors) access to a wide range of health and hospital services at low or no cost.' (Australian Government, Department of Health, <https://www.health.gov.au/health-topics/medicare>)

'Medicare was introduced by the Commonwealth Government in 1984 to provide eligible Australian residents with affordable, accessible and high-quality healthcare. Medicare is based on the understanding that all Australians should contribute to the cost of healthcare according to their ability to pay. It is financed through progressive income taxation and an income-related Medicare levy.' (State Government Victoria, Department of Health, <https://www.racgp.org.au/download/Documents/e-health/Summary-of-new-MBS-item-numbers.pdf>)

### Medicare rebates and item numbers

'The Medicare Benefits Schedule (the MBS) is a list of the medical services for which the Australian Government will pay a Medicare rebate, to provide patients with financial assistance towards the costs of their medical services. Medicare rebates do not, and were never intended to, cover the full cost of medical services. The Government sets a Medicare Schedule Fee to determine the amount of the rebate that patients receive from the Government.' (Australian Medical Association, <https://www.ama.com.au/sites/default/files/documents/Guide%20for%20Patients%20on%20How%20the%20Health%20Care%20System%20Funds%20Medical%20Care.pdf>)

### Bulk billing

'Bulk billing means you don't have to pay for your medical service from a health professional. They [health professionals] bill us [Medicare] instead and they accept the Medicare benefit as full payment for the service. ... Not all health professionals bulk bill.' (Australian Government, Services Australia, <https://www.servicesaustralia.gov.au/individuals/subjects/how-claim-medicare-benefit/bulk-billing>)

## COREQ 32-item checklist

Authors: 1. D. Naehrig, 2. N. Glozier, 3. C. Klinner, 4. L. Acland, 5. B. Goodger, 6. I. Hickie, 7. A. Milton

| Number | Item                                       | Description                                                                                                                                                                                                                                                                                                                                                                                                                                                                                                                                                                                                                                                                               | Page No.                |
|--------|--------------------------------------------|-------------------------------------------------------------------------------------------------------------------------------------------------------------------------------------------------------------------------------------------------------------------------------------------------------------------------------------------------------------------------------------------------------------------------------------------------------------------------------------------------------------------------------------------------------------------------------------------------------------------------------------------------------------------------------------------|-------------------------|
| 1.     | Interviewer                                | Author 1 conducted all interviews.                                                                                                                                                                                                                                                                                                                                                                                                                                                                                                                                                                                                                                                        | Title page, and page 5  |
| 2.     | Researcher credentials                     | Author 1: Dr.med., FMH Radioonkologie, MSc Coach Psych.<br>Author 2: Prof of Psychological Medicine.<br>Author 3: Grad Cert QHR (Qualitative Health Research)<br>Author 4: BA BMed MHM MPH FRACGP.<br>Author 5: Dr<br>Author 6: AM MD FRANZCP FASSA FAHM<br>Author 7: BSc, MAppSc, PhD                                                                                                                                                                                                                                                                                                                                                                                                    | Title page.             |
| 3.     | Occupation                                 | Author 1 is a PhD candidate in psychological medicine, with experience in mixed methods research, as a clinician-researcher, coaching psychology, and as medical communication skills facilitator. Author 3 is a research assistant and experienced qualitative researcher. Author 4 is a general practitioner and head of clinical governance. Author 5 is a general practitioner. Authors 2 and 6 are psychiatrists both with extensive expertise in mixed methods research. Author 7 is a post-doctoral researcher in psychology, with extensive experience in qualitative research design, conduct and analysis.                                                                      | Title page, and page 5. |
| 4.     | Gender                                     | Authors 1, 3, 4 and 7 are female. Authors 2, 5 and 6 are male.                                                                                                                                                                                                                                                                                                                                                                                                                                                                                                                                                                                                                            | Page 5                  |
| 5.     | Experience and training                    | Authors are experienced and active researchers with expertise in qualitative, quantitative, and mixed methods approaches. Authors have researched and published in the broad topic area previously.                                                                                                                                                                                                                                                                                                                                                                                                                                                                                       | Page 5                  |
| 6.     | Relationship established                   | Participants only had direct contact with author 1. GPs interested in participating in the research contacted author 1 via phone, text, or email. Prior to interviews, the participants had the opportunity to review the participant information and consent forms, and discuss any questions, before giving consent. After the interview there was one brief follow-up and thank you email sent out. Author 1's interest in, and perceived importance of the topic of GP wellbeing may have assisted in establishing a relationship built on trust and mutual understanding. Similarly, GPs who are particularly interested in the subject of wellbeing may have chosen to participate. | Page 5                  |
| 7.     | Participants' knowledge of the interviewer | Author 1 who conducted all interviews had no previous professional or personal relationship with any of the participants. Co-authors only reviewed de-identified transcripts thus had no personal relationship with, or knowledge of participants. Participants were informed about who the involved researchers are in the Participant Information Statement (PIS).                                                                                                                                                                                                                                                                                                                      | Page 5                  |
| 8.     | Interviewer characteristics                | The interviewer is a PhD candidate, with a background in medicine and psychology. Author 1 chose to pursue the topic of GP wellbeing, because of perceived importance of the subject matter, and a personal belief that this is crucial in providing sustainable primary care to the population. As such she is aware of potential bias particularly in favour of GPs and their experience.                                                                                                                                                                                                                                                                                               | Page 5                  |
| 9.     | Methodological orientation and theory      | Thematic framework analysis with an inductive, data-driven approach was taken.                                                                                                                                                                                                                                                                                                                                                                                                                                                                                                                                                                                                            | Page 4                  |
| 10.    | Sampling                                   | Maximum variation sampling was applied, as we aimed for a diverse mix of participants across Australia.                                                                                                                                                                                                                                                                                                                                                                                                                                                                                                                                                                                   | Page 5                  |

|     |                                |                                                                                                                                                                                                                                                                                                 |                           |
|-----|--------------------------------|-------------------------------------------------------------------------------------------------------------------------------------------------------------------------------------------------------------------------------------------------------------------------------------------------|---------------------------|
| 11. | Method of approach             | We were supported by several organisations, who sent e-newsletters and communications to their members. Flyers, social media, and snowballing were also utilised.                                                                                                                               | Page 5                    |
| 12. | Sample size                    | N=20                                                                                                                                                                                                                                                                                            | Page 7                    |
| 13. | Non-participation              | Three GPs that were initially interested, subsequently did not partake in the interview. One stated lack of time, the others simply didn't respond to follow-up emails. All interviews that were commenced, were also completed.                                                                | NA                        |
| 14. | Setting of data collection     | Interviews were conducted online one-on-one via a University of Sydney password-protected Zoom meeting room.                                                                                                                                                                                    | Page 5                    |
| 15. | Presence of non-participants   | NA                                                                                                                                                                                                                                                                                              | NA                        |
| 16. | Description of sample          | A diverse group of GPs working clinically in Australia.                                                                                                                                                                                                                                         | Page 5                    |
| 17. | Interview guide                | Interviews were semi-structured, and included questions about GPs' own wellbeing.                                                                                                                                                                                                               | Page 6                    |
| 18. | Repeat interviews              | NA                                                                                                                                                                                                                                                                                              | NA                        |
| 19. | Audio/visual recording         | Interviews were recorded via Zoom, either on audio, or audio and video setting, as per the preference of the GP. Only audio-recordings were saved.                                                                                                                                              | Page 6                    |
| 20. | Field notes                    | Notes were made for analysis and were updated during researcher discussions to inform the writing of the manuscript.                                                                                                                                                                            | N/A                       |
| 21. | Duration                       | Interviews ranged from 20 to 43 minutes (mean 32 minutes duration).                                                                                                                                                                                                                             | Page 7                    |
| 22. | Data saturation                | Interviews were continued until data saturation was achieved. Data saturation was discussed and agreed upon in a team of 2 researchers (author 1 and 3), in consultation with author 7.                                                                                                         | Page 6                    |
| 23. | Transcripts returned           | Transcripts were not returned to participants.                                                                                                                                                                                                                                                  | N/A                       |
| 24. | Number of data coders          | Data was coded by authors 1 and 3.                                                                                                                                                                                                                                                              | Page 6                    |
| 25. | Description of the coding tree | Codes, themes, and subthemes were iteratively refined and developed during regular research team meetings between authors 1 and 3, and were triangulated with authors 2 and 7. Descriptions of the themes, subthemes and codes were developed and captured in a codebook (or coding framework). | Page 6                    |
| 26. | Derivation of themes           | Themes and subthemes were derived from the data.                                                                                                                                                                                                                                                | Page 6, 7                 |
| 27. | Software                       | Microsoft Word and NVivo 12.1.0 were used to manage the data.                                                                                                                                                                                                                                   | Page 6                    |
| 28. | Participant checking           | Participant checking was not applied.                                                                                                                                                                                                                                                           | NA                        |
| 29. | Quotations presented           | Participant quotations were used to exemplify (or illustrate) the finding. Quotations are identified with GP participant numbers, only to maintain anonymity.                                                                                                                                   | Pages 7-14, Table 2.      |
| 30. | Data and findings consistent   | Data and findings are consistent throughout.                                                                                                                                                                                                                                                    | Page 7-19                 |
| 31. | Clarity of major themes        | Themes are clearly described and presented in the manuscript and figure 1.                                                                                                                                                                                                                      | Pages 7,8, and figure 1.  |
| 32. | Clarity of minor themes        | Subthemes are clarified in detail, and their interconnectedness described.                                                                                                                                                                                                                      | Pages 7-14, and figure 1. |

1  
2  
3  
4  
5  
6  
7  
8  
9  
10  
11  
12  
13  
14  
15  
16  
17  
18  
19  
20  
21  
22  
23  
24  
25  
26  
27  
28  
29  
30  
31  
32  
33  
34  
35  
36  
37  
38  
39  
40  
41  
42  
43  
44  
45  
46  
47  
48  
49  
50  
51  
52  
53  
54  
55  
56  
57  
58  
59  
60

For peer review only
